# Supplementary material
Source: Research Square preprint supplement (doi:10.21203/rs.3.rs-8801049/v1)
Supplement: Supplementary file 1 [file 8ca75dea23ff7604ff5b963a.xlsx]

## Sheet: OFE-Infos
Projekttitel:
Systemlösung zur umweltgerechten und bedarfsoptimierten P Düngung auf dem Ackerland
Versuchsplan:
Prüf-	Kurzbezeichnung	Erläuterungen zur P-Düngeplanung bzw. P-Düngung
glieder
1	Kontrolle	ohne P-Düngung
2	Starres (1-ha) Probenahme-Raster (I)	Düngung einheitlich auf Grundlage mittlerer P-Gehalte (nur CAL-P) der Fläche und starrem 1-ha-Probenahme-Raster; Bezug zu mittlerem Ertrag ohne Berücksichtigung von Ertragszonen
3	Komplexes ("intelligentes") Probenahme-Raster (I)	Düngung auf Grundlage der teilflächenspezifischen P-Gehalte (nur CAL-P) der Fläche nach komplexer ("intelligenter") Probenahme; Bezug zu mittlerem Ertrag ohne Berücksichtigung von Ertragszonen
4	Komplexes ("intelligentes") Probenahme-Raster (II)	Düngung auf Grundlage der teilflächenspezifischen P-Gehalte (nur CAL-P) der Fläche nach komplexer ("intelligenter") Probenahme; mit Berücksichtigung von Ertragszonen (3 Ertragszonen)
5	Komplexes ("intelligentes") Probenahme-Raster (III)	Düngung auf Grundlage der teilflächenspezifischen modifizierten P-Gehalte (CAL-P plus P-Freisetzung) der Fläche nach komplexer ("intelligenter") Probenahme und unter Berücksichtigung der P-Nachlieferung; mit Berücksichtigung von Ertragszonen (3 Ertragszonen)
6	Starres (1-ha) Probenahme-Raster (II)	Düngung auf Grundlage der teilflächenspezifischen modifizierten P-Gehalte (CAL-P plus P-Freisetzung) der Fläche nach starrem 1-ha-Probenahme-Raster und unter Berücksichtigung der P-Nachlieferung; mit Berücksichtigung von Ertragszonen (3 Ertragszonen)
Versuchsdurchführungen an 4 Standorten (Praxisbetrieben) in Thüringen
Untersuchung zu alternativen statistischen Verfahren zur Ableitung von Kornerträgen am Beispeil des Standortes RANIS
Daten siehe folgenden Datenblätter
Zur Erläuterung der Datenaufbereitung und Datenzuweisung zu den erstellten Polygonen im GIS siehe PDF-Dateien:
	Großparzellen_Ranis.PDF:	Übersicht zur Versuchsanlage (wie oben, mit NDVI-Darstellung)
	Modellparzellen_Ranis.PDF:	Darstellung zur Rasterung der Versuchsanlage (Polygone in der Größe der Ernteparzellen)
	Reale_Erntespuren.PDF:	Darstellung der realen Erntespuren/ Ernteparzellen; jeweils 3 x 2 Parzellen wurden je Großparzelle mit Pazellenmähdrescher beerntet
		Anmerkung: es gibt geringfügige Lage-Abweichungen (wenige Dezimeter) zwischen den real beernteten Parzellen und den erzeugten Polygonen

## Sheet: Großparzellen & Rasterung
	Übersicht zur Versuchsanlage (wie oben, mit NDVI-Darstellung)
	Darstellung zur Rasterung der Versuchsanlage (Polygone in der Größe der Ernteparzellen)

## Sheet: Ranis_2020_W-Gerste
PG	Block	Position	Ertrag [dt/ha] Feuchtekorrigiert	x_dd	y_dd	05_08_ndvi	05_08_sd	06_09_ndvi	06_09_sd	Typ							NDVI-Werte
1	A	1	102.213	11.5933	50.629	0.861839	0.0187432	0.805905	0.0114388	Ernteparzelle		Position der Ernteparzelle					2020-05-08
1	A	2	94.695	11.5934	50.629	0.867057	0.011625	0.812707	0.00683491	Ernteparzelle							2020-06-09
1	A	3	103.699	11.5935	50.629	0.864785	0.0246167	0.809646	0.00982335	Ernteparzelle
1	A	4	82.4793	11.5933	50.6288	0.832178	0.0221884	0.782051	0.0212601	Ernteparzelle
1	A	5	99.0575	11.5934	50.6288	0.856205	0.0131929	0.804153	0.0122704	Ernteparzelle
1	A	6	94.5603	11.5935	50.6288	0.857238	0.0265125	0.806682	0.0113222	Ernteparzelle
1	B	1	53.2641	11.5959	50.6288	0.567826	0.0705328	0.568161	0.0387523	Ernteparzelle		1	2	3
1	B	2	79.4098	11.596	50.6288	0.654452	0.0787201	0.642236	0.0477814	Ernteparzelle
1	B	3	-	11.5961	50.6288	0.779785	0.0337619	0.752447	0.0255423	Ernteparzelle	kein Ertragswert!
1	B	4	71.5756	11.5959	50.6286	0.796567	0.0411859	0.75576	0.0202683	Ernteparzelle
1	B	5	72.0007	11.596	50.6286	0.783821	0.0278817	0.74977	0.016839	Ernteparzelle
1	B	6	85.5096	11.5961	50.6286	0.831382	0.0374246	0.786565	0.0160996	Ernteparzelle
1	C	1	76.1737	11.5947	50.6301	0.796527	0.0265787	0.757536	0.007543	Ernteparzelle
1	C	2	67.0268	11.5948	50.6301	0.785592	0.0385125	0.770579	0.0139343	Ernteparzelle
1	C	3	86.0046	11.5949	50.6301	0.847536	0.0405918	0.788047	0.0119197	Ernteparzelle
1	C	4	74.6048	11.5947	50.63	0.807613	0.03103	0.766045	0.00989062	Ernteparzelle
1	C	5	65.8824	11.5948	50.63	0.776794	0.0450134	0.758301	0.0154227	Ernteparzelle
1	C	6	86.6298	11.5949	50.63	0.846982	0.0410131	0.784171	0.0140673	Ernteparzelle
1	D	1	74.4117	11.5966	50.6299	0.853271	0.0176615	0.793027	0.0122048	Ernteparzelle
1	D	2	71.5675	11.5967	50.6299	0.784268	0.0432318	0.762214	0.0113211	Ernteparzelle
1	D	3	79.3475	11.5968	50.6299	0.837137	0.0221648	0.793401	0.0147692	Ernteparzelle
1	D	4	86.3429	11.5966	50.6298	0.84303	0.029055	0.792275	0.017446	Ernteparzelle		4	5	6
1	D	5	72.4814	11.5967	50.6298	0.788618	0.0246795	0.760732	0.0070137	Ernteparzelle
1	D	6	79.183	11.5968	50.6298	0.804386	0.0438628	0.772313	0.0148385	Ernteparzelle
2	A	1	68.7139	11.5944	50.6289	0.840536	0.0170559	0.751189	0.0231123	Ernteparzelle
2	A	2	74.1102	11.5945	50.6289	0.848047	0.0139168	0.763136	0.0149075	Ernteparzelle
2	A	3	93.1115	11.5946	50.6289	0.871071	0.0131261	0.797406	0.0118931	Ernteparzelle
2	A	4	84.1628	11.5944	50.6287	0.860051	0.0152714	0.788081	0.00809463	Ernteparzelle
2	A	5	71.5691	11.5945	50.6287	0.867876	0.0124988	0.787145	0.016078	Ernteparzelle
2	A	6	92.0947	11.5946	50.6287	0.870425	0.0265048	0.806451	0.0114033	Ernteparzelle
2	B	1	83.4827	11.597	50.6287	0.842195	0.0247834	0.786337	0.0105895	Ernteparzelle
2	B	2	80.3629	11.5971	50.6287	0.849506	0.0129383	0.797542	0.00896422	Ernteparzelle
2	B	3	96.4746	11.5973	50.6287	0.84704	0.0102784	0.798998	0.00615898	Ernteparzelle
2	B	4	84.4548	11.597	50.6285	0.836595	0.0213885	0.778572	0.00989779	Ernteparzelle
2	B	5	80.0565	11.5971	50.6285	0.829909	0.0159555	0.785175	0.00794714	Ernteparzelle
2	B	6	94.3378	11.5972	50.6285	0.823919	0.0378728	0.782992	0.0143931	Ernteparzelle
2	C	1	73.4126	11.5951	50.6301	0.831703	0.0231489	0.757597	0.0101098	Ernteparzelle
2	C	2	71.7536	11.5952	50.63	0.830079	0.0142156	0.767447	0.0112444	Ernteparzelle
2	C	3	85.4534	11.5953	50.63	0.853671	0.047401	0.79939	0.0191734	Ernteparzelle
2	C	4	79.2206	11.5951	50.63	0.835186	0.0136326	0.76071	0.0105757	Ernteparzelle
2	C	5	78.7067	11.5952	50.63	0.840769	0.0141565	0.782117	0.0060016	Ernteparzelle
2	C	6	95.6097	11.5953	50.6299	0.864716	0.0289749	0.805541	0.00962487	Ernteparzelle
2	D	1	68.1389	11.5973	50.6299	0.829688	0.0364374	0.76941	0.0126104	Ernteparzelle
2	D	2	66.9074	11.5974	50.6298	0.816135	0.0217712	0.757525	0.0117186	Ernteparzelle
2	D	3	70.4376	11.5976	50.6298	0.822531	0.0717009	0.778435	0.0276054	Ernteparzelle
2	D	4	86.5748	11.5973	50.6298	0.833842	0.0327604	0.783651	0.00952038	Ernteparzelle
2	D	5	73.7776	11.5974	50.6298	0.841429	0.014655	0.778938	0.00897547	Ernteparzelle
2	D	6	74.1524	11.5976	50.6298	0.839773	0.0373033	0.784924	0.0175236	Ernteparzelle
3	A	1	62.6491	11.594	50.6289	0.840372	0.0115	0.755835	0.0124617	Ernteparzelle
3	A	2	69.0942	11.5941	50.6289	0.8353	0.0210289	0.767726	0.00969806	Ernteparzelle
3	A	3	90.5145	11.5942	50.6289	0.835782	0.0224916	0.764224	0.0217374	Ernteparzelle
3	A	4	76.3445	11.594	50.6287	0.828866	0.0180425	0.751981	0.00944931	Ernteparzelle
3	A	5	72.6325	11.5941	50.6287	0.841311	0.0251082	0.777732	0.0112111	Ernteparzelle
3	A	6	93.9933	11.5942	50.6287	0.860656	0.0396002	0.801031	0.0104832	Ernteparzelle
3	B	1	71.6718	11.5955	50.6288	0.816414	0.0364047	0.746974	0.0232133	Ernteparzelle
3	B	2	52.0797	11.5956	50.6288	0.719551	0.0439452	0.718437	0.0275728	Ernteparzelle
3	B	3	-	11.5957	50.6288	0.75747	0.0434335	0.710769	0.0319322	Ernteparzelle	kein Ertragswert!
3	B	4	80.8403	11.5955	50.6286	0.870191	0.0121147	0.791958	0.00791012	Ernteparzelle
3	B	5	65.4721	11.5956	50.6286	0.750193	0.0794283	0.769095	0.0269303	Ernteparzelle
3	B	6	90.6865	11.5957	50.6286	0.836188	0.0668663	0.795953	0.0140292	Ernteparzelle
3	C	1	82.8035	11.5936	50.6302	0.827059	0.0242656	0.781652	0.0168191	Ernteparzelle
3	C	2	78.5144	11.5937	50.6302	0.830863	0.0133214	0.775964	0.00903717	Ernteparzelle
3	C	3	74.8351	11.5938	50.6302	0.852785	0.0342975	0.796897	0.015105	Ernteparzelle
3	C	4	89.661	11.5936	50.6301	0.851121	0.0177623	0.797055	0.00741576	Ernteparzelle
3	C	5	87.571	11.5937	50.6301	0.853681	0.00664623	0.792308	0.00469989	Ernteparzelle
3	C	6	79.3542	11.5938	50.6301	0.84791	0.0402787	0.793809	0.0126688	Ernteparzelle
3	D	1	74.6171	11.5958	50.63	0.814899	0.0212745	0.745894	0.0140321	Ernteparzelle
3	D	2	70.8236	11.596	50.63	0.799522	0.0246767	0.763962	0.0150041	Ernteparzelle
3	D	3	87.3313	11.5961	50.63	0.862915	0.0247368	0.812449	0.00986083	Ernteparzelle
3	D	4	74.215	11.5958	50.6299	0.829527	0.0116649	0.764399	0.00987668	Ernteparzelle
3	D	5	71.6673	11.5959	50.6299	0.774954	0.0218618	0.744833	0.0118241	Ernteparzelle
3	D	6	88.2224	11.5961	50.6299	0.854768	0.0405141	0.810225	0.0168834	Ernteparzelle
4	A	1	105.424	11.5936	50.629	0.87472	0.00916152	0.804099	0.00905504	Ernteparzelle
4	A	2	89.4382	11.5938	50.629	0.871419	0.0107819	0.792403	0.0111831	Ernteparzelle
4	A	3	94.7776	11.5939	50.6289	0.86532	0.0147226	0.790339	0.0108969	Ernteparzelle
4	A	4	85.5122	11.5936	50.6288	0.841517	0.0124572	0.78266	0.0146092	Ernteparzelle
4	A	5	86.6354	11.5937	50.6287	0.839072	0.0183134	0.774898	0.0131875	Ernteparzelle
4	A	6	84.8002	11.5939	50.6287	0.846775	0.0431387	0.79244	0.0193548	Ernteparzelle
4	B	1	80.0155	11.5967	50.6287	0.864457	0.0119872	0.801277	0.0195869	Ernteparzelle
4	B	2	90.1586	11.5968	50.6287	0.753526	0.0489268	0.740398	0.0173829	Ernteparzelle
4	B	3	-	11.5969	50.6287	0.829572	0.0603489	0.798051	0.0165608	Ernteparzelle	kein Ertragswert!
4	B	4	103.484	11.5966	50.6285	0.843951	0.0138757	0.782107	0.0102921	Ernteparzelle
4	B	5	78.0827	11.5967	50.6285	0.833114	0.0076118	0.77524	0.00801369	Ernteparzelle
4	B	6	97.6676	11.5969	50.6285	0.843854	0.022255	0.7994	0.0205723	Ernteparzelle
4	C	1	82.2889	11.5943	50.6301	0.864947	0.0118337	0.77945	0.0161251	Ernteparzelle
4	C	2	81.5938	11.5944	50.6301	0.860471	0.00904007	0.777556	0.00624758	Ernteparzelle
4	C	3	82.7905	11.5946	50.6301	0.84867	0.0366995	0.792933	0.0158183	Ernteparzelle
4	C	4	82.1532	11.5943	50.63	0.840756	0.0219897	0.757556	0.0113182	Ernteparzelle
4	C	5	84.9748	11.5944	50.63	0.860829	0.00952508	0.782628	0.0127064	Ernteparzelle
4	C	6	82.1039	11.5946	50.63	0.838613	0.0626753	0.790782	0.0181115	Ernteparzelle
4	D	1	78.2264	11.5955	50.63	0.855396	0.0257284	0.78849	0.0107759	Ernteparzelle
4	D	2	77.7852	11.5956	50.63	0.803596	0.0359952	0.766335	0.0139401	Ernteparzelle
4	D	3	75.3415	11.5957	50.63	0.84368	0.0413902	0.790065	0.0114439	Ernteparzelle
4	D	4	84.0534	11.5955	50.6299	0.847123	0.0297028	0.779699	0.0168584	Ernteparzelle
4	D	5	77.0814	11.5956	50.6299	0.80387	0.0384383	0.776367	0.0141411	Ernteparzelle
4	D	6	88.4685	11.5957	50.6299	0.836335	0.0488242	0.785722	0.0142143	Ernteparzelle
5	A	1	95.8082	11.5951	50.6289	0.863218	0.0180005	0.800925	0.00801481	Ernteparzelle
5	A	2	96.0844	11.5953	50.6288	0.870638	0.00826513	0.797088	0.00932932	Ernteparzelle
5	A	3	96.9751	11.5954	50.6288	0.867433	0.00986548	0.795392	0.0118941	Ernteparzelle
5	A	4	62.3467	11.5951	50.6286	0.867587	0.00979298	0.796802	0.00644615	Ernteparzelle
5	A	5	58.9668	11.5952	50.6286	0.86105	0.0207849	0.788928	0.017676	Ernteparzelle
5	A	6	84.6433	11.5954	50.6286	0.866295	0.0429937	0.808442	0.0247563	Ernteparzelle
5	B	1	93.2679	11.5974	50.6287	0.819293	0.025172	0.766188	0.0116861	Ernteparzelle
5	B	2	88.5323	11.5975	50.6287	0.823621	0.0105578	0.775561	0.0154884	Ernteparzelle
5	B	3	94.8822	11.5976	50.6287	0.837442	0.0176147	0.796666	0.011192	Ernteparzelle
5	B	4	79.4707	11.5974	50.6285	0.81145	0.0171568	0.758822	0.0139236	Ernteparzelle
5	B	5	76.7918	11.5975	50.6285	0.822375	0.0129762	0.760899	0.0117224	Ernteparzelle
5	B	6	79.8128	11.5976	50.6285	0.840858	0.0190363	0.791415	0.0162717	Ernteparzelle
5	C	1	93.6768	11.5932	50.6302	0.860278	0.0132199	0.800215	0.00701677	Ernteparzelle
5	C	2	85.9869	11.5933	50.6302	0.850637	0.0138624	0.800119	0.00744349	Ernteparzelle
5	C	3	86.7414	11.5934	50.6302	0.825777	0.0504102	0.78882	0.0141669	Ernteparzelle
5	C	4	93.0077	11.5932	50.6301	0.861666	0.00917651	0.807121	0.00604444	Ernteparzelle
5	C	5	90.5748	11.5933	50.6301	0.838184	0.0202443	0.797502	0.00732763	Ernteparzelle
5	C	6	87.6262	11.5934	50.6301	0.836406	0.040163	0.796178	0.00805412	Ernteparzelle
5	D	1	69.8076	11.5962	50.63	0.852736	0.0200521	0.800179	0.00863485	Ernteparzelle
5	D	2	45.565	11.5963	50.63	0.87253	0.00788679	0.81208	0.00662435	Ernteparzelle
5	D	3	86.911	11.5964	50.6299	0.876754	0.0321545	0.819934	0.0111751	Ernteparzelle
5	D	4	84.8096	11.5962	50.6299	0.844613	0.0238445	0.796135	0.0106175	Ernteparzelle
5	D	5	75.7693	11.5963	50.6299	0.855578	0.0129607	0.810204	0.00690969	Ernteparzelle
5	D	6	88.3142	11.5964	50.6299	0.873035	0.0546118	0.823891	0.00865994	Ernteparzelle
6	A	1	89.0783	11.5948	50.6289	0.858838	0.0339308	0.776328	0.00987704	Ernteparzelle
6	A	2	88.2043	11.5949	50.6289	0.872454	0.00835124	0.796941	0.00582063	Ernteparzelle
6	A	3	96.3414	11.595	50.6289	0.864466	0.0137078	0.7987	0.0120845	Ernteparzelle
6	A	4	77.6984	11.5948	50.6287	0.863475	0.0146734	0.786038	0.0151223	Ernteparzelle
6	A	5	71.73	11.5949	50.6287	0.858075	0.0128038	0.793135	0.00723735	Ernteparzelle
6	A	6	90.3856	11.595	50.6287	0.86065	0.0304958	0.799191	0.0158756	Ernteparzelle
6	B	1	89.2551	11.5963	50.6288	0.811913	0.0240223	0.751094	0.0171408	Ernteparzelle
6	B	2	91.8323	11.5964	50.6288	0.838147	0.0164095	0.785905	0.00907538	Ernteparzelle
6	B	3	-	11.5965	50.6288	0.870956	0.021034	0.821924	0.0108445	Ernteparzelle	kein Ertragswert!
6	B	4	84.2194	11.5963	50.6286	0.841222	0.0412295	0.785455	0.0150271	Ernteparzelle
6	B	5	87.0101	11.5964	50.6286	0.861001	0.00864972	0.799565	0.00697405	Ernteparzelle
6	B	6	96.482	11.5965	50.6286	0.844519	0.0683562	0.800466	0.0148166	Ernteparzelle
6	C	1	71.5674	11.594	50.6302	0.818713	0.0194939	0.755058	0.01328	Ernteparzelle
6	C	2	79.2154	11.5941	50.6302	0.839263	0.0173373	0.782771	0.0100238	Ernteparzelle
6	C	3	86.436	11.5942	50.6301	0.857122	0.029578	0.791314	0.0112148	Ernteparzelle
6	C	4	80.0092	11.594	50.6301	0.817909	0.0202637	0.753865	0.0209749	Ernteparzelle
6	C	5	80.1056	11.5941	50.6301	0.84766	0.0133212	0.788855	0.0104577	Ernteparzelle
6	C	6	93.3331	11.5942	50.6301	0.860067	0.0235202	0.788257	0.00848119	Ernteparzelle
6	D	1	69.94	11.597	50.6299	0.821586	0.0246344	0.758001	0.0140077	Ernteparzelle
6	D	2	72.6872	11.5971	50.6299	0.810599	0.034012	0.766246	0.0136335	Ernteparzelle
6	D	3	76.27	11.5972	50.6299	0.836681	0.0323053	0.781872	0.0180954	Ernteparzelle
6	D	4	80.0749	11.597	50.6298	0.820632	0.0306403	0.768934	0.018514	Ernteparzelle
6	D	5	73.8634	11.5971	50.6298	0.818177	0.0272652	0.776969	0.0103892	Ernteparzelle
6	D	6	77.7399	11.5972	50.6298	0.84732	0.0223131	0.793003	0.0101823	Ernteparzelle
5	B			11.5974	50.6277	0.827213	0.00856891	0.815066	0.00694577	Modellparzelle
5	B			11.5973	50.6277	0.800848	0.0138385	0.792735	0.00615505	Modellparzelle
5	B			11.5972	50.6277	0.811427	0.0114302	0.797408	0.0108275	Modellparzelle
5	B			11.5974	50.6277	0.823412	0.00996768	0.811114	0.00880397	Modellparzelle
5	B			11.5973	50.6277	0.78554	0.018807	0.785371	0.0094194	Modellparzelle
5	B			11.5972	50.6277	0.803802	0.0134303	0.791574	0.0147775	Modellparzelle
5	B			11.5974	50.6277	0.819553	0.0112266	0.808453	0.00774535	Modellparzelle
5	B			11.5973	50.6277	0.777593	0.0209531	0.780178	0.0132378	Modellparzelle
5	B			11.5972	50.6277	0.791971	0.0204605	0.781296	0.00997499	Modellparzelle
5	B			11.5974	50.6277	0.811227	0.0139053	0.804466	0.0105398	Modellparzelle
5	B			11.5973	50.6277	0.774248	0.0256671	0.776094	0.0125686	Modellparzelle
5	B			11.5972	50.6277	0.786821	0.0335429	0.780032	0.0120222	Modellparzelle
5	B			11.5974	50.6276	0.804827	0.0123504	0.799991	0.00991037	Modellparzelle
5	B			11.5973	50.6276	0.768541	0.0264707	0.768462	0.0143898	Modellparzelle
5	B			11.5972	50.6277	0.783754	0.0343337	0.780642	0.00840526	Modellparzelle
5	B			11.5974	50.6276	0.799353	0.0114075	0.796271	0.00934002	Modellparzelle
5	B			11.5973	50.6276	0.767579	0.0222427	0.764987	0.0111513	Modellparzelle
5	B			11.5972	50.6276	0.773503	0.030798	0.76712	0.0126314	Modellparzelle
5	B			11.5974	50.6276	0.803657	0.0103905	0.798017	0.00749254	Modellparzelle
5	B			11.5973	50.6276	0.767557	0.0196573	0.76431	0.00989714	Modellparzelle
5	B			11.5972	50.6276	0.757764	0.0382656	0.756051	0.0116767	Modellparzelle
5	B			11.5974	50.6276	0.801478	0.0123439	0.796399	0.00652854	Modellparzelle
5	B			11.5973	50.6276	0.765653	0.0193791	0.760808	0.0129301	Modellparzelle
5	B			11.5972	50.6276	0.761828	0.0509849	0.763893	0.0145751	Modellparzelle
5	B			11.5974	50.6276	0.801485	0.0101162	0.793975	0.00677233	Modellparzelle
5	B			11.5973	50.6276	0.749891	0.0306689	0.754447	0.019454	Modellparzelle
5	B			11.5972	50.6276	0.758322	0.0551493	0.765724	0.018806	Modellparzelle
5	B			11.5974	50.6276	0.791209	0.0150567	0.785919	0.00829417	Modellparzelle
5	B			11.5973	50.6276	0.737534	0.0317307	0.749074	0.0203801	Modellparzelle
5	B			11.5972	50.6276	0.742761	0.0543229	0.747918	0.0266673	Modellparzelle
5	B			11.5974	50.6276	0.783873	0.0218612	0.780084	0.0116358	Modellparzelle
5	B			11.5973	50.6276	0.705962	0.0332972	0.722058	0.0184764	Modellparzelle
5	B			11.5972	50.6276	0.736697	0.0514625	0.742201	0.0266417	Modellparzelle
5	B			11.5972	50.6277	0.815851	0.0119273	0.797592	0.00737345	Modellparzelle
5	B			11.5973	50.6277	0.802626	0.0151658	0.790916	0.00895741	Modellparzelle
5	B			11.5974	50.6277	0.824607	0.00829826	0.811735	0.00381112	Modellparzelle
5	B			11.5972	50.6277	0.817227	0.0109743	0.791722	0.00783799	Modellparzelle
5	B			11.5973	50.6277	0.802577	0.017039	0.78606	0.00788083	Modellparzelle
5	B			11.5974	50.6277	0.816828	0.00901857	0.803274	0.00556584	Modellparzelle
5	B			11.5972	50.6277	0.819503	0.00996165	0.790692	0.00955466	Modellparzelle
5	B			11.5973	50.6277	0.801146	0.0154951	0.786269	0.0114805	Modellparzelle
5	B			11.5974	50.6277	0.818756	0.00744987	0.801773	0.00579315	Modellparzelle
5	B			11.5972	50.6278	0.824467	0.00924712	0.797533	0.00801231	Modellparzelle
5	B			11.5973	50.6278	0.80548	0.0107542	0.787037	0.012013	Modellparzelle
5	B			11.5974	50.6277	0.819493	0.00724615	0.80047	0.00477503	Modellparzelle
5	B			11.5972	50.6278	0.822712	0.00928819	0.7984	0.00916578	Modellparzelle
5	B			11.5973	50.6278	0.810224	0.0102984	0.790053	0.0075117	Modellparzelle
5	B			11.5974	50.6278	0.823316	0.00924819	0.804254	0.00415449	Modellparzelle
5	B			11.5972	50.6278	0.819318	0.00927386	0.794887	0.00997426	Modellparzelle
5	B			11.5973	50.6278	0.812666	0.0101057	0.789782	0.00520723	Modellparzelle
5	B			11.5974	50.6278	0.814444	0.0114139	0.798423	0.00740241	Modellparzelle
5	B			11.5972	50.6278	0.806833	0.0121176	0.780233	0.00936227	Modellparzelle
5	B			11.5973	50.6278	0.812199	0.0115979	0.78752	0.00790265	Modellparzelle
5	B			11.5974	50.6278	0.811145	0.0098463	0.794114	0.00762067	Modellparzelle
5	B			11.5972	50.6278	0.792555	0.0119193	0.756075	0.0125058	Modellparzelle
5	B			11.5974	50.6278	0.812376	0.00827875	0.785403	0.00905435	Modellparzelle
5	B			11.5975	50.6278	0.815096	0.0101286	0.794846	0.010118	Modellparzelle
5	B			11.5973	50.6278	0.786867	0.0121679	0.741175	0.0108238	Modellparzelle
5	B			11.5974	50.6278	0.813406	0.00940285	0.786869	0.012307	Modellparzelle
5	B			11.5975	50.6278	0.819349	0.0114375	0.801431	0.0121967	Modellparzelle
5	B			11.5973	50.6278	0.793926	0.0180157	0.747407	0.0176195	Modellparzelle
5	B			11.5974	50.6278	0.809931	0.0109756	0.783231	0.0120958	Modellparzelle
5	B			11.5975	50.6278	0.818276	0.0122767	0.799566	0.0111188	Modellparzelle
5	B			11.5973	50.6279	0.80828	0.0160277	0.771299	0.0172885	Modellparzelle
5	B			11.5974	50.6278	0.800026	0.0165545	0.774948	0.0152628	Modellparzelle
5	B			11.5975	50.6278	0.820847	0.00993886	0.802778	0.00977365	Modellparzelle
5	B			11.5973	50.6279	0.807665	0.0134411	0.768413	0.0111978	Modellparzelle
5	B			11.5974	50.6279	0.794725	0.0170088	0.767366	0.0197639	Modellparzelle
5	B			11.5975	50.6278	0.820008	0.00962472	0.804547	0.00679422	Modellparzelle
5	B			11.5973	50.6279	0.808713	0.0135016	0.769521	0.0107607	Modellparzelle
5	B			11.5974	50.6279	0.809359	0.011776	0.781395	0.0142369	Modellparzelle
5	B			11.5975	50.6279	0.817253	0.0105332	0.803412	0.00476483	Modellparzelle
5	B			11.5973	50.6279	0.812609	0.011564	0.774534	0.00799388	Modellparzelle
5	B			11.5974	50.6279	0.817015	0.0115982	0.792756	0.012297	Modellparzelle
5	B			11.5975	50.6279	0.814586	0.0204566	0.80424	0.012823	Modellparzelle
5	B			11.5973	50.6279	0.820458	0.00743479	0.785785	0.00734493	Modellparzelle
5	B			11.5974	50.6279	0.821205	0.00945167	0.794714	0.0141945	Modellparzelle
5	B			11.5975	50.6279	0.820411	0.0231983	0.80237	0.0150958	Modellparzelle
5	B			11.5973	50.6279	0.820763	0.0080438	0.790065	0.00807364	Modellparzelle
5	B			11.5974	50.6279	0.823897	0.00967945	0.798547	0.00931369	Modellparzelle
5	B			11.5975	50.6279	0.830514	0.0157128	0.806848	0.00923631	Modellparzelle
5	B			11.5973	50.6279	0.820304	0.0098485	0.794136	0.0102007	Modellparzelle
5	B			11.5974	50.6279	0.824531	0.0118977	0.799396	0.00878352	Modellparzelle
5	B			11.5975	50.6279	0.836292	0.0157122	0.812988	0.00833383	Modellparzelle
5	B			11.5973	50.6279	0.821373	0.00978063	0.797917	0.00625438	Modellparzelle
5	B			11.5974	50.6279	0.830277	0.0111857	0.803633	0.00852455	Modellparzelle
5	B			11.5975	50.6279	0.840312	0.013902	0.81736	0.00845032	Modellparzelle
5	B			11.5973	50.628	0.829519	0.0099246	0.801101	0.00417063	Modellparzelle
5	B			11.5974	50.628	0.833059	0.00841293	0.805862	0.00610059	Modellparzelle
5	B			11.5975	50.6279	0.836365	0.0103825	0.813536	0.00870093	Modellparzelle
5	B			11.5973	50.628	0.830035	0.012073	0.800996	0.00407934	Modellparzelle
5	B			11.5974	50.628	0.826846	0.0113945	0.803508	0.00479797	Modellparzelle
5	B			11.5975	50.628	0.833531	0.0084973	0.809858	0.00526775	Modellparzelle
5	B			11.5973	50.628	0.831324	0.0105562	0.800359	0.00486295	Modellparzelle
5	B			11.5974	50.628	0.822501	0.0148483	0.801051	0.00612263	Modellparzelle
5	B			11.5975	50.628	0.827972	0.0134781	0.804239	0.00611346	Modellparzelle
5	B			11.5973	50.628	0.830403	0.0081889	0.801066	0.00690814	Modellparzelle
5	B			11.5974	50.628	0.817046	0.0165783	0.798661	0.00647992	Modellparzelle
5	B			11.5975	50.628	0.819533	0.0127689	0.79379	0.00707923	Modellparzelle
5	B			11.5973	50.628	0.834033	0.0069841	0.805938	0.00685466	Modellparzelle
5	B			11.5974	50.628	0.813755	0.0184352	0.795216	0.00903531	Modellparzelle
5	B			11.5975	50.628	0.81679	0.0108382	0.788213	0.00629777	Modellparzelle
5	B			11.5973	50.628	0.837555	0.0075767	0.810493	0.00474717	Modellparzelle
5	B			11.5974	50.628	0.813647	0.0217888	0.789917	0.0141235	Modellparzelle
5	B			11.5975	50.628	0.817157	0.0150437	0.789277	0.00744482	Modellparzelle
5	B			11.5973	50.628	0.834508	0.00875554	0.806016	0.00553486	Modellparzelle
5	B			11.5974	50.628	0.820573	0.0189032	0.794158	0.0130883	Modellparzelle
5	B			11.5975	50.628	0.826046	0.0109081	0.796632	0.00656128	Modellparzelle
5	B			11.5973	50.6281	0.833494	0.00919051	0.805743	0.00709959	Modellparzelle
5	B			11.5974	50.628	0.824463	0.0107671	0.793702	0.00888793	Modellparzelle
5	B			11.5975	50.628	0.829184	0.0138438	0.800636	0.00593168	Modellparzelle
5	B			11.5973	50.6281	0.834642	0.00961646	0.808468	0.00722741	Modellparzelle
5	B			11.5974	50.6281	0.826753	0.0134276	0.794214	0.0114005	Modellparzelle
5	B			11.5975	50.628	0.834191	0.0159835	0.80199	0.00712435	Modellparzelle
5	B			11.5973	50.6281	0.837594	0.00957449	0.808269	0.00874555	Modellparzelle
5	B			11.5974	50.6281	0.819484	0.0148166	0.785872	0.0115269	Modellparzelle
5	B			11.5975	50.6281	0.836963	0.013784	0.806713	0.00669038	Modellparzelle
5	B			11.5973	50.6281	0.837968	0.00915669	0.805791	0.00787584	Modellparzelle
5	B			11.5974	50.6281	0.821331	0.0159247	0.785308	0.0144376	Modellparzelle
5	B			11.5975	50.6281	0.839412	0.0142969	0.811624	0.00830067	Modellparzelle
5	B			11.5973	50.6281	0.836782	0.0111084	0.804135	0.00530257	Modellparzelle
5	B			11.5974	50.6281	0.827832	0.00968481	0.789799	0.0133207	Modellparzelle
5	B			11.5975	50.6281	0.847678	0.0110879	0.818097	0.00837866	Modellparzelle
5	B			11.5973	50.6281	0.831179	0.0164513	0.798702	0.00862437	Modellparzelle
5	B			11.5974	50.6281	0.832848	0.00737367	0.79808	0.0109193	Modellparzelle
5	B			11.5975	50.6281	0.84781	0.0074917	0.818801	0.0063693	Modellparzelle
5	B			11.5973	50.6281	0.832139	0.00990174	0.798033	0.0063232	Modellparzelle
5	B			11.5974	50.6281	0.833165	0.00684194	0.797805	0.00830321	Modellparzelle
5	B			11.5975	50.6281	0.844393	0.00881972	0.816868	0.00409851	Modellparzelle
5	B			11.5973	50.6281	0.833532	0.0153737	0.802418	0.0071286	Modellparzelle
5	B			11.5974	50.6281	0.833161	0.00945616	0.796362	0.0087173	Modellparzelle
5	B			11.5975	50.6281	0.841671	0.0114933	0.811762	0.00501622	Modellparzelle
5	B			11.5973	50.6282	0.833579	0.0177715	0.800929	0.00758526	Modellparzelle
5	B			11.5974	50.6282	0.835997	0.0110391	0.797946	0.0105257	Modellparzelle
5	B			11.5975	50.6281	0.839893	0.0134145	0.810579	0.00518883	Modellparzelle
5	B			11.5973	50.6282	0.835885	0.0106985	0.798203	0.00588958	Modellparzelle
5	B			11.5974	50.6282	0.831682	0.0149139	0.789633	0.0146706	Modellparzelle
5	B			11.5976	50.6282	0.836321	0.0150057	0.808775	0.00996409	Modellparzelle
5	B			11.5973	50.6282	0.830089	0.0126514	0.789851	0.00669553	Modellparzelle
5	B			11.5975	50.6282	0.82895	0.0133382	0.783682	0.0136571	Modellparzelle
5	B			11.5976	50.6282	0.837066	0.0141958	0.810309	0.00814382	Modellparzelle
5	B			11.5973	50.6282	0.820317	0.0217597	0.780131	0.0080198	Modellparzelle
5	B			11.5975	50.6282	0.820005	0.016176	0.773301	0.0162645	Modellparzelle
5	B			11.5976	50.6282	0.840423	0.0184272	0.810157	0.0124266	Modellparzelle
5	B			11.5974	50.6282	0.816931	0.0274915	0.775804	0.0130203	Modellparzelle
5	B			11.5975	50.6282	0.819773	0.0137156	0.77144	0.0139938	Modellparzelle
5	B			11.5976	50.6282	0.848323	0.0155418	0.813848	0.0103827	Modellparzelle
5	B			11.5974	50.6282	0.806035	0.0371862	0.762645	0.017382	Modellparzelle
5	B			11.5975	50.6282	0.815173	0.0161464	0.767919	0.01391	Modellparzelle
5	B			11.5976	50.6282	0.851079	0.0132631	0.811561	0.00902956	Modellparzelle
5	B			11.5974	50.6282	0.799936	0.0392292	0.75194	0.0196366	Modellparzelle
5	B			11.5975	50.6282	0.821606	0.0128248	0.769076	0.0124789	Modellparzelle
5	B			11.5976	50.6282	0.851026	0.010101	0.809499	0.00691898	Modellparzelle
5	B			11.5974	50.6283	0.808035	0.0297327	0.759251	0.0174485	Modellparzelle
5	B			11.5975	50.6282	0.830771	0.0103968	0.78238	0.00972551	Modellparzelle
5	B			11.5976	50.6282	0.847954	0.00797632	0.805622	0.00650799	Modellparzelle
5	B			11.5974	50.6283	0.815409	0.0192995	0.769355	0.0118797	Modellparzelle
5	B			11.5975	50.6283	0.832966	0.00800928	0.786744	0.00690679	Modellparzelle
5	B			11.5976	50.6282	0.849842	0.00753564	0.804648	0.00866967	Modellparzelle
5	B			11.5974	50.6283	0.820932	0.0186924	0.778331	0.00915116	Modellparzelle
5	B			11.5975	50.6283	0.826407	0.0104508	0.777243	0.00905679	Modellparzelle
5	B			11.5976	50.6283	0.851201	0.00849679	0.808617	0.0079618	Modellparzelle
5	B			11.5974	50.6283	0.821836	0.0291092	0.780113	0.0107694	Modellparzelle
5	B			11.5975	50.6283	0.825884	0.00886963	0.777251	0.0103624	Modellparzelle
5	B			11.5976	50.6283	0.853767	0.00809893	0.810813	0.00656835	Modellparzelle
5	B			11.5974	50.6283	0.824305	0.0235614	0.778146	0.0133935	Modellparzelle
5	B			11.5975	50.6283	0.817986	0.0129634	0.768838	0.011517	Modellparzelle
5	B			11.5976	50.6283	0.852834	0.00949943	0.809383	0.00722634	Modellparzelle
5	B			11.5974	50.6283	0.81696	0.0211464	0.770583	0.011462	Modellparzelle
5	B			11.5975	50.6283	0.808107	0.0164642	0.759418	0.0130047	Modellparzelle
5	B			11.5976	50.6283	0.8538	0.00853092	0.812718	0.0073183	Modellparzelle
5	B			11.5974	50.6283	0.81229	0.0191214	0.764287	0.0102164	Modellparzelle
5	B			11.5975	50.6283	0.810552	0.0175691	0.762523	0.0126439	Modellparzelle
5	B			11.5976	50.6283	0.854963	0.00890503	0.813619	0.00704371	Modellparzelle
5	B			11.5974	50.6283	0.813845	0.0184859	0.765932	0.0111858	Modellparzelle
5	B			11.5975	50.6283	0.820305	0.0109809	0.773499	0.00831858	Modellparzelle
5	B			11.5976	50.6283	0.853055	0.00994317	0.812518	0.00805409	Modellparzelle
5	B			11.5974	50.6284	0.808649	0.0256957	0.762507	0.0156128	Modellparzelle
5	B			11.5975	50.6284	0.823755	0.0127821	0.779141	0.00831995	Modellparzelle
5	B			11.5976	50.6283	0.854521	0.00751713	0.812849	0.00688129	Modellparzelle
5	B			11.5974	50.6284	0.818244	0.0193727	0.772791	0.0110636	Modellparzelle
5	B			11.5975	50.6284	0.820242	0.0186456	0.776956	0.0125243	Modellparzelle
5	B			11.5976	50.6284	0.855614	0.00685966	0.813814	0.00481711	Modellparzelle
5	B			11.5974	50.6284	0.812765	0.0152964	0.766915	0.0144674	Modellparzelle
5	B			11.5975	50.6284	0.816125	0.0157667	0.775717	0.0106285	Modellparzelle
5	B			11.5976	50.6284	0.856178	0.00748124	0.81162	0.00660073	Modellparzelle
5	B			11.5974	50.6284	0.804906	0.0236048	0.758694	0.0157691	Modellparzelle
5	B			11.5975	50.6284	0.816094	0.0156612	0.776121	0.00867996	Modellparzelle
5	B			11.5976	50.6284	0.853243	0.00839776	0.810442	0.00703707	Modellparzelle
5	B			11.5974	50.6284	0.809592	0.0208592	0.762201	0.0116294	Modellparzelle
5	B			11.5975	50.6284	0.814427	0.0169223	0.772502	0.00852827	Modellparzelle
5	B			11.5976	50.6284	0.849125	0.00991053	0.808666	0.00816957	Modellparzelle
5	B			11.5974	50.6284	0.813254	0.0229459	0.765847	0.00959968	Modellparzelle
5	B			11.5975	50.6284	0.814754	0.0187818	0.768112	0.00925388	Modellparzelle
5	B			11.5976	50.6284	0.850706	0.00821338	0.809733	0.00693625	Modellparzelle
5	B			11.5974	50.6284	0.808867	0.025752	0.756579	0.0127138	Modellparzelle
5	B			11.5975	50.6284	0.820378	0.0165149	0.768906	0.00927023	Modellparzelle
5	B			11.5976	50.6284	0.85062	0.00903043	0.80767	0.00866462	Modellparzelle
5	B			11.5974	50.6285	0.809316	0.0296718	0.756226	0.0122185	Modellparzelle
5	B			11.5975	50.6284	0.82432	0.0119089	0.769764	0.00839249	Modellparzelle
5	B			11.5976	50.6284	0.850635	0.0106499	0.808584	0.00832057	Modellparzelle
5	B			11.5974	50.6285	0.813548	0.0243962	0.757548	0.0136125	Modellparzelle
5	B			11.5975	50.6285	0.825514	0.0135295	0.76972	0.00856357	Modellparzelle
5	B			11.5976	50.6284	0.847664	0.00962265	0.801803	0.00760591	Modellparzelle
5	B			11.5974	50.6285	0.81331	0.0155659	0.754772	0.0110991	Modellparzelle
5	B			11.5975	50.6285	0.823668	0.0130538	0.763899	0.0105728	Modellparzelle
5	B			11.5976	50.6285	0.845788	0.00915208	0.796439	0.0083488	Modellparzelle
5	B			11.5974	50.6285	0.812403	0.0104054	0.74894	0.0122316	Modellparzelle
5	B			11.5975	50.6285	0.820783	0.0137461	0.76109	0.0112726	Modellparzelle
5	B			11.5976	50.6285	0.845638	0.00921495	0.796967	0.00929562	Modellparzelle
5	B			11.5974	50.6285	0.809498	0.0123843	0.746276	0.0121828	Modellparzelle
5	B			11.5975	50.6285	0.821261	0.0117822	0.765463	0.0134792	Modellparzelle
5	B			11.5976	50.6285	0.848826	0.00827903	0.799355	0.00860241	Modellparzelle
5	B			11.5974	50.6285	0.811449	0.0128967	0.74841	0.0103175	Modellparzelle
5	B			11.5975	50.6285	0.817979	0.0123172	0.762536	0.0114193	Modellparzelle
5	B			11.5976	50.6285	0.853063	0.00711821	0.804514	0.00662662	Modellparzelle
5	B			11.5974	50.6285	0.810442	0.0144047	0.749786	0.012001	Modellparzelle
5	B			11.5975	50.6285	0.809333	0.0145219	0.755092	0.0162096	Modellparzelle
5	B			11.5976	50.6285	0.849436	0.00940883	0.798545	0.00955231	Modellparzelle
5	B			11.5974	50.6285	0.803849	0.0179259	0.747604	0.0138784	Modellparzelle
5	B			11.5975	50.6285	0.806928	0.0133522	0.752665	0.0185008	Modellparzelle
5	B			11.5976	50.6285	0.843997	0.0121076	0.792497	0.0121119	Modellparzelle
5	B			11.5974	50.6286	0.810334	0.0148106	0.752267	0.0126495	Modellparzelle
5	B			11.5975	50.6286	0.80794	0.0166809	0.754376	0.0161982	Modellparzelle
5	B			11.5976	50.6285	0.845887	0.0102037	0.796272	0.0114766	Modellparzelle
5	B			11.5974	50.6286	0.805811	0.0165071	0.744541	0.0179465	Modellparzelle
5	B			11.5975	50.6286	0.802451	0.0122648	0.745965	0.0140076	Modellparzelle
5	B			11.5976	50.6286	0.839823	0.0103306	0.78951	0.00909384	Modellparzelle
5	B			11.5974	50.6286	0.811641	0.0137445	0.742204	0.0161125	Modellparzelle
5	B			11.5975	50.6286	0.800525	0.0176675	0.744884	0.0195808	Modellparzelle
5	B			11.5976	50.6286	0.8296	0.0118452	0.779862	0.00928157	Modellparzelle
5	B			11.5974	50.6286	0.819226	0.013838	0.751109	0.0195353	Modellparzelle
5	B			11.5975	50.6286	0.807767	0.01326	0.750588	0.0171261	Modellparzelle
5	B			11.5976	50.6286	0.832054	0.0124059	0.780893	0.0130459	Modellparzelle
5	B			11.5974	50.6286	0.821938	0.0138342	0.760594	0.0208222	Modellparzelle
5	B			11.5975	50.6286	0.811544	0.0137458	0.754653	0.0178521	Modellparzelle
5	B			11.5976	50.6286	0.834176	0.013962	0.783309	0.0159518	Modellparzelle
5	B			11.5974	50.6286	0.82454	0.0153633	0.765971	0.0210579	Modellparzelle
5	B			11.5975	50.6286	0.810397	0.0126041	0.754336	0.0170146	Modellparzelle
5	B			11.5976	50.6286	0.834702	0.0174001	0.786161	0.0161974	Modellparzelle
5	B			11.5974	50.6286	0.82332	0.016035	0.764616	0.0223087	Modellparzelle
5	B			11.5975	50.6286	0.809537	0.0146549	0.756976	0.018977	Modellparzelle
5	B			11.5976	50.6286	0.8338	0.0153504	0.788664	0.0137032	Modellparzelle
5	B			11.5974	50.6287	0.826888	0.0115418	0.766579	0.0173455	Modellparzelle
5	B			11.5975	50.6286	0.818574	0.0120243	0.76363	0.0155626	Modellparzelle
5	B			11.5976	50.6286	0.834426	0.0137968	0.795789	0.00917016	Modellparzelle
5	B			11.5974	50.6287	0.827822	0.00784989	0.767698	0.0103367	Modellparzelle
5	B			11.5975	50.6287	0.820611	0.0139023	0.768833	0.0198243	Modellparzelle
5	B			11.5976	50.6287	0.833518	0.0155644	0.7958	0.00899973	Modellparzelle
5	B			11.5974	50.6287	0.821984	0.00860214	0.761401	0.0109612	Modellparzelle
5	B			11.5975	50.6287	0.827054	0.0139374	0.779578	0.0184768	Modellparzelle
5	B			11.5976	50.6287	0.83805	0.010884	0.795481	0.00867688	Modellparzelle
5	B			11.5974	50.6287	0.823801	0.0111049	0.765625	0.0095666	Modellparzelle
5	B			11.5975	50.6287	0.824244	0.0106562	0.778899	0.0139995	Modellparzelle
5	B			11.5976	50.6287	0.838109	0.0109765	0.7965	0.00615379	Modellparzelle
5	B			11.5974	50.6287	0.81594	0.0143397	0.758114	0.0160439	Modellparzelle
5	B			11.5975	50.6287	0.822948	0.0110055	0.773018	0.01146	Modellparzelle
5	B			11.5976	50.6287	0.839577	0.0096535	0.794209	0.00571253	Modellparzelle
5	B			11.5974	50.6287	0.817463	0.0166262	0.760387	0.0220978	Modellparzelle
5	B			11.5975	50.6287	0.826194	0.0104685	0.775806	0.0140283	Modellparzelle
5	B			11.5976	50.6287	0.844953	0.00714205	0.79948	0.00659408	Modellparzelle
5	B			11.5974	50.6287	0.820569	0.0145421	0.763038	0.0195627	Modellparzelle
5	B			11.5975	50.6287	0.825535	0.0125907	0.771931	0.01321	Modellparzelle
5	B			11.5976	50.6287	0.84761	0.00972446	0.803584	0.00704381	Modellparzelle
5	B			11.5974	50.6288	0.820835	0.012064	0.761414	0.0127445	Modellparzelle
5	B			11.5975	50.6287	0.823851	0.0112515	0.771377	0.0133107	Modellparzelle
5	B			11.5976	50.6287	0.843759	0.0124067	0.798831	0.0081901	Modellparzelle
5	B			11.5974	50.6288	0.817265	0.013342	0.755136	0.0160056	Modellparzelle
5	B			11.5975	50.6288	0.819615	0.0120091	0.771176	0.0141845	Modellparzelle
5	B			11.5976	50.6287	0.841063	0.0129225	0.795383	0.00862996	Modellparzelle
5	B			11.5974	50.6288	0.82668	0.0122725	0.767414	0.0136347	Modellparzelle
5	B			11.5975	50.6288	0.812891	0.0147325	0.767487	0.0114385	Modellparzelle
5	B			11.5976	50.6288	0.83986	0.00949841	0.793957	0.00681913	Modellparzelle
5	B			11.5974	50.6288	0.826368	0.00873993	0.767606	0.0120064	Modellparzelle
5	B			11.5975	50.6288	0.805154	0.0162979	0.757274	0.0126804	Modellparzelle
5	B			11.5976	50.6288	0.845277	0.008414	0.798458	0.00709255	Modellparzelle
5	B			11.5974	50.6288	0.82741	0.0120481	0.768141	0.00810087	Modellparzelle
5	B			11.5975	50.6288	0.806682	0.0206605	0.759547	0.0104455	Modellparzelle
5	B			11.5976	50.6288	0.848276	0.0111666	0.802221	0.0105728	Modellparzelle
5	B			11.5974	50.6288	0.830305	0.0100499	0.767905	0.00808683	Modellparzelle
5	B			11.5975	50.6288	0.802112	0.0251729	0.755622	0.00941222	Modellparzelle
5	B			11.5976	50.6288	0.842948	0.0182548	0.795799	0.0113885	Modellparzelle
5	B			11.5974	50.6288	0.83558	0.00756015	0.772202	0.00770921	Modellparzelle
5	B			11.5975	50.6288	0.804562	0.0305196	0.759487	0.0114015	Modellparzelle
5	B			11.5976	50.6288	0.838575	0.0212508	0.790777	0.0134988	Modellparzelle
5	B			11.5974	50.6288	0.835612	0.00867318	0.772417	0.0055298	Modellparzelle
5	B			11.5975	50.6288	0.805189	0.0260214	0.75698	0.00938662	Modellparzelle
5	B			11.5976	50.6288	0.836069	0.0264112	0.792918	0.0138095	Modellparzelle
5	B			11.5974	50.6289	0.832257	0.00910098	0.767248	0.00822861	Modellparzelle
5	B			11.5975	50.6289	0.809164	0.0240799	0.7596	0.00816339	Modellparzelle
5	B			11.5976	50.6288	0.835802	0.0271287	0.792309	0.0136404	Modellparzelle
5	B			11.5974	50.6289	0.827064	0.0096	0.760351	0.0100604	Modellparzelle
5	B			11.5975	50.6289	0.810211	0.0234626	0.761178	0.0101098	Modellparzelle
5	B			11.5976	50.6289	0.834462	0.0272911	0.790571	0.0129911	Modellparzelle
5	B			11.5974	50.6289	0.828817	0.0115494	0.763467	0.00990482	Modellparzelle
5	B			11.5975	50.6289	0.806335	0.0246329	0.755888	0.00831739	Modellparzelle
5	B			11.5976	50.6289	0.832313	0.0282659	0.790747	0.0152447	Modellparzelle
5	B			11.5974	50.6289	0.83674	0.00998162	0.770271	0.0137796	Modellparzelle
5	B			11.5975	50.6289	0.81157	0.0163564	0.756996	0.00999095	Modellparzelle
5	B			11.5976	50.6289	0.838098	0.0191316	0.793235	0.0120681	Modellparzelle
5	B			11.5974	50.6289	0.835489	0.0117224	0.768928	0.0164524	Modellparzelle
5	B			11.5975	50.6289	0.814421	0.0163205	0.758604	0.0120976	Modellparzelle
5	B			11.5976	50.6289	0.84201	0.0142777	0.796929	0.00950987	Modellparzelle
5	B			11.5974	50.6289	0.823651	0.015871	0.757472	0.0198968	Modellparzelle
5	B			11.5975	50.6289	0.810517	0.0124568	0.753031	0.0139537	Modellparzelle
5	B			11.5976	50.6289	0.837248	0.0133733	0.792214	0.00787998	Modellparzelle
5	B			11.5974	50.6289	0.818067	0.0124219	0.752434	0.0160512	Modellparzelle
5	B			11.5975	50.6289	0.815676	0.0118165	0.755851	0.0192915	Modellparzelle
5	B			11.5976	50.6289	0.840521	0.016397	0.791562	0.00964182	Modellparzelle
5	B			11.5974	50.629	0.811043	0.0131467	0.747629	0.0116731	Modellparzelle
5	B			11.5975	50.6289	0.816943	0.0118366	0.754344	0.0194003	Modellparzelle
5	B			11.5976	50.6289	0.842766	0.0174122	0.793123	0.0111461	Modellparzelle
5	B			11.5974	50.629	0.810474	0.0138484	0.747906	0.0105478	Modellparzelle
5	B			11.5975	50.629	0.814781	0.010085	0.755753	0.012656	Modellparzelle
5	B			11.5976	50.629	0.842508	0.0189342	0.794118	0.013115	Modellparzelle
5	B			11.5974	50.629	0.815137	0.0156306	0.756214	0.00868522	Modellparzelle
5	B			11.5975	50.629	0.811201	0.0149045	0.754299	0.0118964	Modellparzelle
5	B			11.5976	50.629	0.838219	0.0186815	0.79153	0.0103088	Modellparzelle
5	B			11.5974	50.629	0.815304	0.0153542	0.758465	0.00706931	Modellparzelle
5	B			11.5975	50.629	0.80517	0.0170466	0.754125	0.00880461	Modellparzelle
5	B			11.5976	50.629	0.829371	0.0247812	0.782685	0.0106835	Modellparzelle
5	B			11.5974	50.629	0.809573	0.0121937	0.753359	0.0136992	Modellparzelle
5	B			11.5975	50.629	0.799828	0.019814	0.747145	0.0119772	Modellparzelle
5	B			11.5976	50.629	0.826514	0.0316248	0.782297	0.0148515	Modellparzelle
5	B			11.5974	50.629	0.803322	0.0144646	0.745692	0.0169198	Modellparzelle
5	B			11.5975	50.629	0.800277	0.0225758	0.741177	0.0121321	Modellparzelle
5	B			11.5976	50.629	0.823365	0.0327864	0.779411	0.0200885	Modellparzelle
5	B			11.5974	50.629	0.797668	0.0162964	0.736426	0.0176704	Modellparzelle
5	B			11.5975	50.629	0.799039	0.0252254	0.739754	0.0109189	Modellparzelle
5	B			11.5976	50.629	0.823982	0.0329502	0.779649	0.0244743	Modellparzelle
5	B			11.5974	50.6291	0.793129	0.0174512	0.729543	0.0195235	Modellparzelle
5	B			11.5975	50.629	0.794065	0.0362482	0.73815	0.0172109	Modellparzelle
5	B			11.5976	50.629	0.822568	0.0348926	0.778823	0.0230701	Modellparzelle
2	B			11.5972	50.6291	0.837192	0.0130936	0.780013	0.00984426	Modellparzelle
2	B			11.5971	50.6291	0.834179	0.0191478	0.787599	0.00682674	Modellparzelle
2	B			11.597	50.6291	0.823212	0.0868606	0.775308	0.0096547	Modellparzelle
2	B			11.5972	50.6291	0.835567	0.0153777	0.777816	0.011344	Modellparzelle
2	B			11.5971	50.6291	0.837672	0.0241996	0.79014	0.0109367	Modellparzelle
2	B			11.597	50.6291	0.828617	0.0776249	0.783117	0.00879168	Modellparzelle
2	B			11.5972	50.629	0.835054	0.0180925	0.779165	0.0131891	Modellparzelle
2	B			11.5971	50.629	0.836341	0.0278928	0.789405	0.0133337	Modellparzelle
2	B			11.597	50.6291	0.821289	0.0726455	0.775863	0.00952484	Modellparzelle
2	B			11.5972	50.629	0.833214	0.0179978	0.778959	0.0132153	Modellparzelle
2	B			11.5971	50.629	0.836478	0.0235072	0.787003	0.0103845	Modellparzelle
2	B			11.597	50.629	0.814864	0.0718951	0.765146	0.0116845	Modellparzelle
2	B			11.5972	50.629	0.836263	0.0140874	0.778932	0.0117995	Modellparzelle
2	B			11.5971	50.629	0.834561	0.023454	0.785614	0.0120323	Modellparzelle
2	B			11.597	50.629	0.807567	0.0765132	0.759717	0.0130194	Modellparzelle
2	B			11.5972	50.629	0.830357	0.0182424	0.771254	0.0137302	Modellparzelle
2	B			11.5971	50.629	0.830579	0.0302889	0.781918	0.0164623	Modellparzelle
2	B			11.597	50.629	0.807334	0.073857	0.761579	0.0169689	Modellparzelle
2	B			11.5972	50.629	0.830368	0.0212097	0.770633	0.0135503	Modellparzelle
2	B			11.5971	50.629	0.82936	0.0338631	0.77985	0.0184408	Modellparzelle
2	B			11.597	50.629	0.814459	0.0773438	0.769933	0.0168171	Modellparzelle
2	B			11.5972	50.629	0.827052	0.0187312	0.770134	0.0135222	Modellparzelle
2	B			11.5971	50.629	0.826401	0.0385428	0.775952	0.0207697	Modellparzelle
2	B			11.597	50.629	0.816052	0.0766724	0.771851	0.0129482	Modellparzelle
2	B			11.5972	50.629	0.833444	0.016748	0.773081	0.0117371	Modellparzelle
2	B			11.5971	50.629	0.82563	0.031548	0.77361	0.0169433	Modellparzelle
2	B			11.597	50.629	0.81761	0.0736779	0.771	0.0168677	Modellparzelle
2	B			11.5972	50.6289	0.836754	0.013027	0.777266	0.00978473	Modellparzelle
2	B			11.5971	50.629	0.827495	0.0289001	0.775123	0.0162159	Modellparzelle
2	B			11.597	50.629	0.81552	0.0790012	0.769334	0.012853	Modellparzelle
2	B			11.5972	50.6289	0.84529	0.0130683	0.787866	0.0123433	Modellparzelle
2	B			11.5971	50.6289	0.831656	0.0228145	0.778865	0.0113882	Modellparzelle
2	B			11.597	50.6289	0.820099	0.0666758	0.776095	0.0111879	Modellparzelle
2	B			11.5972	50.6289	0.838404	0.0205398	0.783271	0.0137466	Modellparzelle
2	B			11.5971	50.6289	0.834978	0.0232731	0.78219	0.0127459	Modellparzelle
2	B			11.597	50.6289	0.81895	0.0810821	0.779687	0.0134915	Modellparzelle
2	B			11.5972	50.6289	0.839526	0.0134446	0.783569	0.00976608	Modellparzelle
2	B			11.5971	50.6289	0.830003	0.0249471	0.77981	0.0134623	Modellparzelle
2	B			11.597	50.6289	0.816683	0.0785215	0.772993	0.0119402	Modellparzelle
2	B			11.5972	50.6289	0.845692	0.0114498	0.791131	0.00755683	Modellparzelle
2	B			11.5971	50.6289	0.829911	0.0297319	0.782158	0.0185233	Modellparzelle
2	B			11.597	50.6289	0.814656	0.0883866	0.773649	0.0157323	Modellparzelle
2	B			11.5972	50.6289	0.853289	0.0141492	0.797391	0.0102067	Modellparzelle
2	B			11.5971	50.6289	0.838406	0.0216972	0.785417	0.012717	Modellparzelle
2	B			11.597	50.6289	0.81485	0.0876143	0.771168	0.0180217	Modellparzelle
2	B			11.5972	50.6289	0.851287	0.0132806	0.79364	0.0116897	Modellparzelle
2	B			11.5971	50.6289	0.83721	0.0215277	0.781191	0.0117194	Modellparzelle
2	B			11.597	50.6289	0.814549	0.0983891	0.777587	0.0220425	Modellparzelle
2	B			11.5972	50.6288	0.847587	0.0147724	0.791138	0.011678	Modellparzelle
2	B			11.5971	50.6289	0.83524	0.0211251	0.78204	0.0117463	Modellparzelle
2	B			11.597	50.6289	0.81794	0.0923098	0.779097	0.0163587	Modellparzelle
2	B			11.5972	50.6288	0.847058	0.0113608	0.792944	0.00784973	Modellparzelle
2	B			11.5971	50.6288	0.841295	0.0185036	0.787812	0.0119721	Modellparzelle
2	B			11.597	50.6289	0.813978	0.102794	0.775168	0.0236886	Modellparzelle
2	B			11.5972	50.6288	0.851285	0.0111249	0.796771	0.00538467	Modellparzelle
2	B			11.5971	50.6288	0.843444	0.0183977	0.790458	0.012755	Modellparzelle
2	B			11.597	50.6288	0.815074	0.0872359	0.770492	0.0153162	Modellparzelle
2	B			11.5972	50.6288	0.854472	0.00818358	0.800888	0.00687621	Modellparzelle
2	B			11.5971	50.6288	0.847774	0.0151779	0.792256	0.00819229	Modellparzelle
2	B			11.597	50.6288	0.816109	0.0880279	0.775241	0.0118193	Modellparzelle
2	B			11.5972	50.6288	0.854448	0.0111473	0.798817	0.00966309	Modellparzelle
2	B			11.5971	50.6288	0.845594	0.0143046	0.792851	0.00701478	Modellparzelle
2	B			11.597	50.6288	0.817095	0.0887757	0.777531	0.00888288	Modellparzelle
2	B			11.5972	50.6288	0.853149	0.00996912	0.796551	0.00919435	Modellparzelle
2	B			11.5971	50.6288	0.844847	0.0147889	0.792272	0.00858014	Modellparzelle
2	B			11.597	50.6288	0.824837	0.0821404	0.785516	0.00775132	Modellparzelle
2	B			11.5972	50.6288	0.856413	0.00756881	0.798982	0.00871769	Modellparzelle
2	B			11.5971	50.6288	0.849563	0.013923	0.797443	0.00830374	Modellparzelle
2	B			11.597	50.6288	0.824195	0.0865068	0.787272	0.00770702	Modellparzelle
2	B			11.5972	50.6288	0.857531	0.00687802	0.801535	0.00738245	Modellparzelle
2	B			11.5971	50.6288	0.854042	0.0116438	0.802976	0.00844271	Modellparzelle
2	B			11.597	50.6288	0.821518	0.0858121	0.785156	0.00937579	Modellparzelle
2	B			11.5972	50.6287	0.856624	0.0075011	0.802769	0.00923087	Modellparzelle
2	B			11.5971	50.6287	0.854335	0.00636047	0.798893	0.00516583	Modellparzelle
2	B			11.597	50.6288	0.822116	0.0815663	0.781718	0.00844545	Modellparzelle
2	B			11.5972	50.6287	0.854588	0.00761426	0.800468	0.00962074	Modellparzelle
2	B			11.5971	50.6287	0.854658	0.00799867	0.801903	0.00487982	Modellparzelle
2	B			11.597	50.6287	0.819143	0.0908488	0.782198	0.00999109	Modellparzelle
2	B			11.5972	50.6287	0.850213	0.00735751	0.798201	0.00700299	Modellparzelle
2	B			11.5971	50.6287	0.854009	0.0107181	0.802724	0.00696139	Modellparzelle
2	B			11.597	50.6287	0.819474	0.0945494	0.785733	0.0100478	Modellparzelle
2	B			11.5972	50.6287	0.848537	0.00521456	0.800658	0.00599366	Modellparzelle
2	B			11.5971	50.6287	0.849131	0.0138202	0.797658	0.00943537	Modellparzelle
2	B			11.597	50.6287	0.819509	0.0915007	0.784632	0.0113305	Modellparzelle
2	B			11.5972	50.6287	0.851037	0.00545444	0.804868	0.00543206	Modellparzelle
2	B			11.5971	50.6287	0.848638	0.0140981	0.798333	0.00733827	Modellparzelle
2	B			11.597	50.6287	0.813518	0.0962722	0.778	0.0125366	Modellparzelle
2	B			11.5972	50.6287	0.851781	0.00561547	0.80602	0.00609234	Modellparzelle
2	B			11.5971	50.6287	0.84933	0.0135848	0.798858	0.00620234	Modellparzelle
2	B			11.597	50.6287	0.817101	0.0896505	0.780401	0.00943363	Modellparzelle
2	B			11.5972	50.6287	0.849077	0.00829236	0.804216	0.00739647	Modellparzelle
2	B			11.5971	50.6287	0.84832	0.0153168	0.795391	0.00855069	Modellparzelle
2	B			11.597	50.6287	0.829799	0.0758414	0.792806	0.00880358	Modellparzelle
2	B			11.5972	50.6286	0.846246	0.00757559	0.800539	0.00771364	Modellparzelle
2	B			11.5971	50.6287	0.847456	0.0184816	0.795965	0.0125512	Modellparzelle
2	B			11.597	50.6287	0.82896	0.0874885	0.794296	0.0142544	Modellparzelle
2	B			11.5972	50.6286	0.841639	0.0100551	0.794625	0.0107017	Modellparzelle
2	B			11.5971	50.6286	0.850489	0.0142528	0.801882	0.0123879	Modellparzelle
2	B			11.597	50.6287	0.828688	0.0847546	0.792201	0.0131523	Modellparzelle
2	B			11.5972	50.6286	0.837011	0.0159451	0.791785	0.0144367	Modellparzelle
2	B			11.5971	50.6286	0.853972	0.0102982	0.804507	0.00972258	Modellparzelle
2	B			11.597	50.6286	0.830369	0.0786359	0.794035	0.01324	Modellparzelle
2	B			11.5972	50.6286	0.842516	0.01348	0.799446	0.0107817	Modellparzelle
2	B			11.5971	50.6286	0.853243	0.00906492	0.804744	0.00692122	Modellparzelle
2	B			11.597	50.6286	0.829562	0.0742359	0.791615	0.0130566	Modellparzelle
2	B			11.5972	50.6286	0.83962	0.0116343	0.797321	0.0110999	Modellparzelle
2	B			11.5971	50.6286	0.851713	0.0105153	0.801488	0.00760511	Modellparzelle
2	B			11.597	50.6286	0.824142	0.0848722	0.789612	0.0121836	Modellparzelle
2	B			11.5972	50.6286	0.834088	0.0152297	0.790688	0.0160277	Modellparzelle
2	B			11.5971	50.6286	0.849734	0.00889494	0.796478	0.00667928	Modellparzelle
2	B			11.597	50.6286	0.823183	0.0810738	0.784615	0.0137328	Modellparzelle
2	B			11.5972	50.6286	0.829232	0.0200997	0.784065	0.0183405	Modellparzelle
2	B			11.5971	50.6286	0.847412	0.00868752	0.796489	0.00674242	Modellparzelle
2	B			11.597	50.6286	0.823191	0.0794433	0.787428	0.0156224	Modellparzelle
2	B			11.5972	50.6286	0.827977	0.0156234	0.782425	0.0121318	Modellparzelle
2	B			11.5971	50.6286	0.844971	0.0119384	0.794686	0.00833362	Modellparzelle
2	B			11.597	50.6286	0.821931	0.0823775	0.783315	0.0224024	Modellparzelle
2	B			11.5972	50.6285	0.831333	0.0109287	0.789032	0.0071679	Modellparzelle
2	B			11.5971	50.6285	0.837468	0.0106961	0.78809	0.00788988	Modellparzelle
2	B			11.597	50.6286	0.81728	0.0748247	0.773909	0.012703	Modellparzelle
2	B			11.5972	50.6285	0.830386	0.0117019	0.784499	0.00947685	Modellparzelle
2	B			11.5971	50.6285	0.83495	0.0127047	0.782414	0.00699086	Modellparzelle
2	B			11.597	50.6285	0.82314	0.0724864	0.783502	0.0134048	Modellparzelle
2	B			11.5972	50.6285	0.828109	0.0138661	0.780708	0.00789764	Modellparzelle
2	B			11.5971	50.6285	0.829905	0.0137641	0.782823	0.00937591	Modellparzelle
2	B			11.597	50.6285	0.817774	0.0831786	0.776582	0.024238	Modellparzelle
2	B			11.5972	50.6285	0.828574	0.0171258	0.783645	0.010472	Modellparzelle
2	B			11.5971	50.6285	0.830069	0.0156472	0.786798	0.00745529	Modellparzelle
2	B			11.597	50.6285	0.816143	0.0793858	0.771533	0.0162302	Modellparzelle
2	B			11.5972	50.6285	0.830036	0.0188471	0.787776	0.0143318	Modellparzelle
2	B			11.5971	50.6285	0.83055	0.0163934	0.785962	0.00894365	Modellparzelle
2	B			11.597	50.6285	0.818652	0.081468	0.777414	0.0170707	Modellparzelle
2	B			11.5972	50.6285	0.833938	0.0156086	0.786412	0.013978	Modellparzelle
2	B			11.5971	50.6285	0.835402	0.0177286	0.788764	0.00908943	Modellparzelle
2	B			11.597	50.6285	0.821268	0.0759362	0.783058	0.0156783	Modellparzelle
2	B			11.5972	50.6285	0.835484	0.0108126	0.788079	0.00881047	Modellparzelle
2	B			11.5971	50.6285	0.837675	0.0245744	0.797397	0.0120252	Modellparzelle
2	B			11.597	50.6285	0.813949	0.0796164	0.770058	0.0205568	Modellparzelle
2	B			11.5972	50.6284	0.838442	0.00887468	0.794954	0.00906328	Modellparzelle
2	B			11.5971	50.6285	0.841454	0.0234918	0.801927	0.0139138	Modellparzelle
2	B			11.597	50.6285	0.809557	0.0706329	0.766916	0.0197232	Modellparzelle
2	B			11.5972	50.6284	0.842306	0.00839168	0.800411	0.00728094	Modellparzelle
2	B			11.5971	50.6284	0.842368	0.0160997	0.796678	0.00702095	Modellparzelle
2	B			11.597	50.6284	0.817192	0.0745629	0.781836	0.0152368	Modellparzelle
2	B			11.5972	50.6284	0.835595	0.0092921	0.791833	0.0105688	Modellparzelle
2	B			11.5971	50.6284	0.843801	0.0139021	0.799595	0.0071881	Modellparzelle
2	B			11.597	50.6284	0.826824	0.0761319	0.794571	0.0167639	Modellparzelle
2	B			11.5972	50.6284	0.834057	0.0088796	0.792284	0.00930154	Modellparzelle
2	B			11.5971	50.6284	0.85046	0.0142561	0.80708	0.0135956	Modellparzelle
2	B			11.597	50.6284	0.829555	0.0695338	0.793195	0.0167361	Modellparzelle
2	B			11.5972	50.6284	0.836927	0.00897964	0.794684	0.00812957	Modellparzelle
2	B			11.5971	50.6284	0.852492	0.0150548	0.808054	0.0110689	Modellparzelle
2	B			11.597	50.6284	0.829047	0.0700725	0.792682	0.0146713	Modellparzelle
2	B			11.5972	50.6284	0.839473	0.0109348	0.796767	0.0104382	Modellparzelle
2	B			11.5971	50.6284	0.855353	0.0133468	0.809126	0.0127952	Modellparzelle
2	B			11.597	50.6284	0.830025	0.0753213	0.790894	0.0245779	Modellparzelle
2	B			11.5972	50.6284	0.844596	0.00861975	0.799859	0.00936898	Modellparzelle
2	B			11.5971	50.6284	0.853613	0.0114875	0.810222	0.00812275	Modellparzelle
2	B			11.597	50.6284	0.832063	0.0793055	0.79307	0.0217503	Modellparzelle
2	B			11.5972	50.6283	0.840699	0.00863284	0.796562	0.0107276	Modellparzelle
2	B			11.5971	50.6284	0.851851	0.00986556	0.806292	0.0062307	Modellparzelle
2	B			11.597	50.6284	0.84125	0.0632688	0.800966	0.0132148	Modellparzelle
2	B			11.5972	50.6283	0.841937	0.00967485	0.801624	0.0132312	Modellparzelle
2	B			11.5971	50.6283	0.851755	0.0130867	0.805452	0.00815202	Modellparzelle
2	B			11.597	50.6284	0.845507	0.0627201	0.806644	0.0114148	Modellparzelle
2	B			11.5972	50.6283	0.844814	0.0115683	0.803553	0.0178288	Modellparzelle
2	B			11.5971	50.6283	0.859139	0.0133425	0.811892	0.0105293	Modellparzelle
2	B			11.597	50.6283	0.84587	0.0693816	0.808591	0.0140762	Modellparzelle
2	B			11.5972	50.6283	0.849403	0.0132028	0.805659	0.01667	Modellparzelle
2	B			11.5971	50.6283	0.861638	0.0112168	0.812375	0.0107402	Modellparzelle
2	B			11.597	50.6283	0.846527	0.0585354	0.808023	0.0109394	Modellparzelle
2	B			11.5972	50.6283	0.849259	0.0162506	0.802812	0.0249193	Modellparzelle
2	B			11.5971	50.6283	0.858161	0.0142559	0.806934	0.0190416	Modellparzelle
2	B			11.597	50.6283	0.842213	0.0610528	0.803851	0.00982772	Modellparzelle
2	B			11.5972	50.6283	0.847486	0.0156647	0.80197	0.0251224	Modellparzelle
2	B			11.5971	50.6283	0.856621	0.0152536	0.802693	0.0179024	Modellparzelle
2	B			11.597	50.6283	0.841983	0.063561	0.807085	0.00972791	Modellparzelle
2	B			11.5972	50.6283	0.849295	0.010078	0.809605	0.0130057	Modellparzelle
2	B			11.5971	50.6283	0.860016	0.0128623	0.808692	0.0127003	Modellparzelle
2	B			11.597	50.6283	0.843291	0.064187	0.810841	0.00980076	Modellparzelle
2	B			11.5972	50.6283	0.853236	0.00673402	0.815391	0.00859661	Modellparzelle
2	B			11.5971	50.6283	0.86372	0.00904886	0.816057	0.00724193	Modellparzelle
2	B			11.597	50.6283	0.834574	0.064553	0.800825	0.0124054	Modellparzelle
2	B			11.5972	50.6282	0.859649	0.00599677	0.821674	0.00568329	Modellparzelle
2	B			11.5971	50.6283	0.862645	0.00886971	0.816575	0.00754532	Modellparzelle
2	B			11.597	50.6283	0.830698	0.070033	0.799336	0.0158597	Modellparzelle
2	B			11.5972	50.6282	0.861463	0.00667444	0.82174	0.00476355	Modellparzelle
2	B			11.5971	50.6282	0.854998	0.00746782	0.811002	0.00556516	Modellparzelle
2	B			11.597	50.6282	0.823046	0.0824594	0.794828	0.0163545	Modellparzelle
2	B			11.5972	50.6282	0.859566	0.00899899	0.821005	0.00674464	Modellparzelle
2	B			11.5971	50.6282	0.851241	0.0100675	0.809409	0.00796481	Modellparzelle
2	B			11.597	50.6282	0.818428	0.0816636	0.786638	0.0171118	Modellparzelle
2	B			11.5972	50.6282	0.853844	0.0147173	0.815634	0.0136422	Modellparzelle
2	B			11.5971	50.6282	0.846737	0.0133137	0.803142	0.0108796	Modellparzelle
2	B			11.597	50.6282	0.815198	0.079727	0.784169	0.0143781	Modellparzelle
2	B			11.5972	50.6282	0.848385	0.0170007	0.80929	0.0147822	Modellparzelle
2	B			11.5971	50.6282	0.843395	0.0140797	0.801625	0.0116998	Modellparzelle
2	B			11.597	50.6282	0.811692	0.081174	0.781391	0.0163754	Modellparzelle
2	B			11.5972	50.6282	0.84321	0.0242405	0.803658	0.0208569	Modellparzelle
2	B			11.5971	50.6282	0.840888	0.0141822	0.801001	0.0139276	Modellparzelle
2	B			11.597	50.6282	0.811159	0.0797086	0.781381	0.0170198	Modellparzelle
2	B			11.5972	50.6282	0.845997	0.0209926	0.805874	0.0177608	Modellparzelle
2	B			11.5971	50.6282	0.839451	0.0152189	0.80128	0.0147968	Modellparzelle
2	B			11.5969	50.6282	0.812239	0.0894679	0.78048	0.0165808	Modellparzelle
2	B			11.5972	50.6281	0.840232	0.0239664	0.801553	0.0212256	Modellparzelle
2	B			11.5971	50.6282	0.835106	0.0206838	0.795271	0.0178619	Modellparzelle
2	B			11.5969	50.6282	0.811329	0.0917121	0.782141	0.0188341	Modellparzelle
2	B			11.5972	50.6281	0.837697	0.0213502	0.802612	0.0184667	Modellparzelle
2	B			11.597	50.6281	0.83705	0.023035	0.792119	0.0189099	Modellparzelle
2	B			11.5969	50.6282	0.819727	0.0902005	0.793276	0.0179201	Modellparzelle
2	B			11.5972	50.6281	0.833573	0.0176992	0.798144	0.0148676	Modellparzelle
2	B			11.597	50.6281	0.83737	0.0185211	0.797443	0.0145011	Modellparzelle
2	B			11.5969	50.6281	0.820721	0.0875578	0.795396	0.0132584	Modellparzelle
2	B			11.5972	50.6281	0.836962	0.0117326	0.798243	0.0110198	Modellparzelle
2	B			11.597	50.6281	0.846019	0.0114446	0.805442	0.0112998	Modellparzelle
2	B			11.5969	50.6281	0.822367	0.082703	0.793532	0.0134982	Modellparzelle
2	B			11.5971	50.6281	0.844144	0.00674257	0.80699	0.00732719	Modellparzelle
2	B			11.597	50.6281	0.8509	0.00908045	0.808935	0.00696763	Modellparzelle
2	B			11.5969	50.6281	0.818261	0.0830888	0.789628	0.0181267	Modellparzelle
2	B			11.5971	50.6281	0.848634	0.006344	0.812782	0.00636045	Modellparzelle
2	B			11.597	50.6281	0.851195	0.00946056	0.808691	0.00583215	Modellparzelle
2	B			11.5969	50.6281	0.820069	0.074555	0.786871	0.0211714	Modellparzelle
2	B			11.5971	50.6281	0.851501	0.00694391	0.816931	0.00828658	Modellparzelle
2	B			11.597	50.6281	0.84721	0.00786312	0.799731	0.00730056	Modellparzelle
2	B			11.5969	50.6281	0.808318	0.0666538	0.767958	0.0195668	Modellparzelle
2	B			11.5971	50.6281	0.847647	0.00752002	0.81192	0.00892447	Modellparzelle
2	B			11.597	50.6281	0.841248	0.00821943	0.79435	0.0136069	Modellparzelle
2	B			11.5969	50.6281	0.798017	0.0477859	0.754937	0.0174902	Modellparzelle
2	B			11.5971	50.628	0.842012	0.00864338	0.808792	0.00594019	Modellparzelle
2	B			11.597	50.6281	0.846231	0.00956828	0.800953	0.00968076	Modellparzelle
2	B			11.5969	50.6281	0.805851	0.0439699	0.765729	0.0138276	Modellparzelle
2	B			11.5971	50.628	0.837452	0.016013	0.80861	0.00776802	Modellparzelle
2	B			11.597	50.628	0.845317	0.00871202	0.803053	0.00842465	Modellparzelle
2	B			11.5969	50.628	0.817482	0.0326541	0.772262	0.0129544	Modellparzelle
2	B			11.5971	50.628	0.842359	0.0156156	0.815933	0.00928926	Modellparzelle
2	B			11.597	50.628	0.847661	0.00875753	0.809066	0.00486182	Modellparzelle
2	B			11.5969	50.628	0.82724	0.0337521	0.781794	0.0152317	Modellparzelle
2	B			11.5971	50.628	0.83999	0.0115614	0.812876	0.0134668	Modellparzelle
2	B			11.597	50.628	0.848848	0.00930776	0.80934	0.00591094	Modellparzelle
2	B			11.5969	50.628	0.829448	0.0326962	0.782514	0.0125331	Modellparzelle
2	B			11.5971	50.628	0.836482	0.0102627	0.807527	0.0111792	Modellparzelle
2	B			11.597	50.628	0.845483	0.0104686	0.802833	0.0115686	Modellparzelle
2	B			11.5969	50.628	0.826588	0.0313362	0.779984	0.0121461	Modellparzelle
2	B			11.5971	50.628	0.835126	0.00726057	0.806717	0.00812533	Modellparzelle
2	B			11.597	50.628	0.837429	0.0123198	0.799232	0.00666062	Modellparzelle
2	B			11.5969	50.628	0.823313	0.0250126	0.779332	0.017113	Modellparzelle
2	B			11.5971	50.628	0.837875	0.00815611	0.808038	0.00622744	Modellparzelle
2	B			11.597	50.628	0.824893	0.0170224	0.784878	0.0109229	Modellparzelle
2	B			11.5969	50.628	0.826128	0.022913	0.785158	0.0234849	Modellparzelle
2	B			11.5971	50.6279	0.8346	0.00662444	0.805037	0.00549439	Modellparzelle
2	B			11.597	50.628	0.820719	0.0200742	0.786407	0.00978142	Modellparzelle
2	B			11.5969	50.628	0.822944	0.0186064	0.78073	0.0211001	Modellparzelle
2	B			11.5971	50.6279	0.835012	0.00944292	0.804859	0.00644121	Modellparzelle
2	B			11.597	50.6279	0.825745	0.0158044	0.794091	0.00779312	Modellparzelle
2	B			11.5969	50.628	0.820598	0.0210249	0.775286	0.0186097	Modellparzelle
2	B			11.5971	50.6279	0.830576	0.00929431	0.802489	0.00465872	Modellparzelle
2	B			11.597	50.6279	0.834366	0.0111017	0.803685	0.00593891	Modellparzelle
2	B			11.5969	50.6279	0.82282	0.0192007	0.780003	0.0152614	Modellparzelle
2	B			11.5971	50.6279	0.825418	0.00835237	0.801723	0.00639937	Modellparzelle
2	B			11.597	50.6279	0.837648	0.0119211	0.80632	0.00812771	Modellparzelle
2	B			11.5969	50.6279	0.829292	0.0186338	0.787767	0.0139388	Modellparzelle
2	B			11.5971	50.6279	0.824064	0.0109522	0.80198	0.0103945	Modellparzelle
2	B			11.597	50.6279	0.841682	0.00945984	0.809517	0.00537885	Modellparzelle
2	B			11.5969	50.6279	0.830547	0.0174626	0.792147	0.01252	Modellparzelle
2	B			11.5971	50.6279	0.826581	0.0107145	0.801285	0.00803396	Modellparzelle
2	B			11.597	50.6279	0.843483	0.00702857	0.810362	0.00358637	Modellparzelle
2	B			11.5969	50.6279	0.82406	0.0184024	0.790308	0.0108576	Modellparzelle
2	B			11.5971	50.6279	0.831297	0.00949881	0.803437	0.00574913	Modellparzelle
2	B			11.597	50.6279	0.842906	0.00646331	0.812202	0.00439921	Modellparzelle
2	B			11.5969	50.6279	0.816747	0.0195969	0.783678	0.0118575	Modellparzelle
2	B			11.5971	50.6279	0.833343	0.00998691	0.805754	0.00583936	Modellparzelle
2	B			11.597	50.6279	0.842237	0.00747634	0.810413	0.00687554	Modellparzelle
2	B			11.5969	50.6279	0.817635	0.0193735	0.783384	0.0173401	Modellparzelle
2	B			11.5971	50.6278	0.840131	0.00890728	0.813608	0.0055448	Modellparzelle
2	B			11.597	50.6279	0.839737	0.00810401	0.807328	0.00539047	Modellparzelle
2	B			11.5969	50.6279	0.829012	0.014077	0.794569	0.0121397	Modellparzelle
2	B			11.5971	50.6278	0.841808	0.00795418	0.813441	0.00710702	Modellparzelle
2	B			11.597	50.6278	0.837005	0.0093736	0.806322	0.00590747	Modellparzelle
2	B			11.5969	50.6278	0.834009	0.0128897	0.800356	0.00553884	Modellparzelle
2	B			11.5971	50.6278	0.837306	0.0087597	0.813536	0.00538385	Modellparzelle
2	B			11.597	50.6278	0.833513	0.00837977	0.803168	0.00475348	Modellparzelle
2	B			11.5969	50.6278	0.835697	0.0129271	0.803556	0.00744029	Modellparzelle
2	B			11.5971	50.6278	0.838218	0.00843979	0.814015	0.00640967	Modellparzelle
2	B			11.597	50.6278	0.831523	0.010059	0.80302	0.00620537	Modellparzelle
2	B			11.5969	50.6278	0.828613	0.0137299	0.799615	0.00780651	Modellparzelle
2	B			11.5971	50.6278	0.839903	0.00923308	0.816628	0.00519887	Modellparzelle
2	B			11.597	50.6278	0.82943	0.00755637	0.807131	0.00912136	Modellparzelle
2	B			11.5968	50.6278	0.818394	0.0137666	0.79431	0.0101649	Modellparzelle
2	B			11.5971	50.6278	0.83745	0.00845372	0.814626	0.00530172	Modellparzelle
2	B			11.5969	50.6278	0.82444	0.0106084	0.805078	0.0118326	Modellparzelle
2	B			11.5968	50.6278	0.809981	0.0175213	0.78781	0.00768061	Modellparzelle
2	B			11.5971	50.6278	0.835465	0.00858129	0.814279	0.0050805	Modellparzelle
2	B			11.5969	50.6278	0.824879	0.00956182	0.804699	0.00801508	Modellparzelle
2	B			11.5968	50.6278	0.808451	0.0232911	0.7864	0.00874068	Modellparzelle
2	B			11.597	50.6277	0.836118	0.00945957	0.813945	0.00680382	Modellparzelle
2	B			11.5969	50.6278	0.817669	0.0125045	0.798341	0.00864465	Modellparzelle
2	B			11.5968	50.6278	0.810069	0.0241534	0.787096	0.00973319	Modellparzelle
2	B			11.597	50.6277	0.836028	0.0102617	0.817896	0.00687843	Modellparzelle
2	B			11.5969	50.6277	0.819428	0.012855	0.805865	0.00862146	Modellparzelle
2	B			11.5968	50.6278	0.811017	0.0159036	0.788846	0.010822	Modellparzelle
2	B			11.597	50.6277	0.83507	0.00951799	0.816161	0.00694536	Modellparzelle
2	B			11.5969	50.6277	0.822261	0.00966344	0.808943	0.00778671	Modellparzelle
2	B			11.5968	50.6277	0.810627	0.0158117	0.792876	0.00971907	Modellparzelle
2	B			11.597	50.6277	0.829415	0.00788173	0.815276	0.00594646	Modellparzelle
2	B			11.5969	50.6277	0.817412	0.0110721	0.803442	0.00602102	Modellparzelle
2	B			11.5968	50.6277	0.811564	0.0150175	0.794477	0.00781125	Modellparzelle
2	B			11.597	50.6277	0.828538	0.0085159	0.813501	0.00581011	Modellparzelle
2	B			11.5969	50.6277	0.820091	0.0128313	0.797646	0.0108981	Modellparzelle
2	B			11.5968	50.6277	0.815238	0.0137361	0.797092	0.00972128	Modellparzelle
2	B			11.597	50.6277	0.832499	0.0110688	0.818402	0.00754453	Modellparzelle
2	B			11.5969	50.6277	0.823513	0.0117166	0.806299	0.0105987	Modellparzelle
2	B			11.5968	50.6277	0.81911	0.0152286	0.801801	0.00490775	Modellparzelle
2	B			11.597	50.6277	0.8351	0.0137039	0.82229	0.00863623	Modellparzelle
2	B			11.5969	50.6277	0.827942	0.0140971	0.81369	0.0106166	Modellparzelle
2	B			11.5968	50.6277	0.819004	0.0133351	0.80413	0.00536512	Modellparzelle
2	B			11.597	50.6277	0.833641	0.0132572	0.819042	0.00790073	Modellparzelle
2	B			11.5969	50.6277	0.828146	0.0135602	0.815438	0.00874176	Modellparzelle
2	B			11.5968	50.6277	0.818707	0.0108117	0.80278	0.00885688	Modellparzelle
2	B			11.597	50.6276	0.835662	0.0121993	0.821459	0.00559559	Modellparzelle
2	B			11.5969	50.6277	0.819308	0.0130867	0.811947	0.0100342	Modellparzelle
2	B			11.5968	50.6277	0.818725	0.00965887	0.801163	0.00917793	Modellparzelle
2	B			11.597	50.6276	0.830263	0.015132	0.820482	0.00806249	Modellparzelle
2	B			11.5969	50.6276	0.80952	0.0166669	0.805259	0.0127376	Modellparzelle
2	B			11.5968	50.6276	0.8151	0.00988954	0.79499	0.00681331	Modellparzelle
2	B			11.597	50.6276	0.823821	0.0172084	0.818211	0.00542806	Modellparzelle
2	B			11.5969	50.6276	0.797422	0.0251165	0.796978	0.0121601	Modellparzelle
2	B			11.5968	50.6276	0.812937	0.010727	0.792493	0.00738039	Modellparzelle
2	B			11.597	50.6276	0.817979	0.0157422	0.819437	0.00569703	Modellparzelle
2	B			11.5969	50.6276	0.789202	0.0226024	0.78856	0.0127568	Modellparzelle
2	B			11.5968	50.6276	0.813214	0.0128188	0.790714	0.0131857	Modellparzelle
2	B			11.597	50.6276	0.811697	0.0163311	0.81549	0.00892186	Modellparzelle
2	B			11.5969	50.6276	0.779206	0.0171665	0.779468	0.0111509	Modellparzelle
2	B			11.5968	50.6276	0.805035	0.0145694	0.784714	0.0125854	Modellparzelle
4	B			11.5967	50.6279	0.849555	0.00957974	0.823556	0.00454764	Modellparzelle
4	B			11.5966	50.6279	0.839782	0.00710598	0.810414	0.00532695	Modellparzelle
4	B			11.5965	50.628	0.842653	0.00777732	0.813053	0.0064922	Modellparzelle
4	B			11.5967	50.6279	0.854745	0.0104422	0.827306	0.00448793	Modellparzelle
4	B			11.5966	50.6279	0.840442	0.00779725	0.811393	0.00647675	Modellparzelle
4	B			11.5965	50.6279	0.847306	0.00746135	0.816403	0.00494816	Modellparzelle
4	B			11.5967	50.6279	0.85593	0.0100552	0.826508	0.00439355	Modellparzelle
4	B			11.5966	50.6279	0.844295	0.00785186	0.81646	0.00516775	Modellparzelle
4	B			11.5965	50.6279	0.848791	0.00884513	0.813917	0.00665729	Modellparzelle
4	B			11.5967	50.6279	0.855311	0.00954013	0.829835	0.00360565	Modellparzelle
4	B			11.5966	50.6279	0.844496	0.00723575	0.818391	0.00439058	Modellparzelle
4	B			11.5965	50.6279	0.843095	0.0102432	0.807612	0.00728732	Modellparzelle
4	B			11.5967	50.6279	0.85635	0.01068	0.830693	0.00365007	Modellparzelle
4	B			11.5966	50.6279	0.841076	0.00836963	0.81522	0.00662024	Modellparzelle
4	B			11.5965	50.6279	0.834749	0.0136606	0.802106	0.0105314	Modellparzelle
4	B			11.5967	50.6279	0.853614	0.0113532	0.829007	0.00434935	Modellparzelle
4	B			11.5966	50.6279	0.833025	0.0125454	0.806969	0.00750723	Modellparzelle
4	B			11.5965	50.6279	0.828408	0.015237	0.79344	0.0135157	Modellparzelle
4	B			11.5967	50.6279	0.846718	0.0107003	0.820854	0.00544714	Modellparzelle
4	B			11.5966	50.6279	0.827987	0.0103364	0.804587	0.00692746	Modellparzelle
4	B			11.5965	50.6279	0.823464	0.0106474	0.791877	0.0079602	Modellparzelle
4	B			11.5967	50.6278	0.839744	0.0141181	0.815284	0.00783506	Modellparzelle
4	B			11.5966	50.6279	0.821838	0.0160448	0.801148	0.0088844	Modellparzelle
4	B			11.5965	50.6279	0.820664	0.0131706	0.793519	0.0117898	Modellparzelle
4	B			11.5967	50.6278	0.832845	0.0128742	0.814632	0.00670383	Modellparzelle
4	B			11.5966	50.6278	0.817813	0.0158951	0.802539	0.0074184	Modellparzelle
4	B			11.5965	50.6279	0.822418	0.0126435	0.795987	0.0122192	Modellparzelle
4	B			11.5967	50.6278	0.829558	0.0133736	0.817492	0.0046808	Modellparzelle
4	B			11.5966	50.6278	0.81592	0.0148688	0.802837	0.00551072	Modellparzelle
4	B			11.5965	50.6278	0.822838	0.00929552	0.799414	0.00680177	Modellparzelle
4	B			11.5967	50.6278	0.833441	0.014583	0.820664	0.00593873	Modellparzelle
4	B			11.5966	50.6278	0.811774	0.0117818	0.798581	0.0055967	Modellparzelle
4	B			11.5965	50.6278	0.821997	0.00742272	0.800007	0.00556405	Modellparzelle
4	B			11.5967	50.6278	0.837356	0.0145546	0.818655	0.00618095	Modellparzelle
4	B			11.5966	50.6278	0.805611	0.0121843	0.793767	0.0066075	Modellparzelle
4	B			11.5965	50.6278	0.815493	0.00903106	0.791424	0.0077044	Modellparzelle
4	B			11.5967	50.6278	0.833038	0.0158295	0.81762	0.00675644	Modellparzelle
4	B			11.5966	50.6278	0.801053	0.0171586	0.792921	0.008751	Modellparzelle
4	B			11.5965	50.6278	0.815055	0.00952339	0.789234	0.00727378	Modellparzelle
4	B			11.5967	50.6278	0.82926	0.0171146	0.815545	0.00652949	Modellparzelle
4	B			11.5966	50.6278	0.814548	0.0155921	0.805054	0.00703225	Modellparzelle
4	B			11.5965	50.6278	0.820884	0.00992117	0.798094	0.00716646	Modellparzelle
4	B			11.5967	50.6278	0.824587	0.0140432	0.813404	0.00582388	Modellparzelle
4	B			11.5966	50.6278	0.815363	0.0147869	0.804184	0.00587132	Modellparzelle
4	B			11.5965	50.6278	0.816371	0.0165331	0.796502	0.00803452	Modellparzelle
4	B			11.5967	50.6277	0.821768	0.0133113	0.809503	0.00768269	Modellparzelle
4	B			11.5966	50.6278	0.814189	0.0154012	0.800226	0.00715643	Modellparzelle
4	B			11.5965	50.6278	0.814238	0.0181051	0.797877	0.00673114	Modellparzelle
4	B			11.5967	50.6277	0.823275	0.0111131	0.80934	0.00810355	Modellparzelle
4	B			11.5966	50.6277	0.815152	0.0171856	0.803417	0.00745237	Modellparzelle
4	B			11.5964	50.6277	0.807864	0.0226285	0.7954	0.0115594	Modellparzelle
4	B			11.5967	50.6277	0.837194	0.0111028	0.822469	0.0071442	Modellparzelle
4	B			11.5966	50.6277	0.814963	0.0139731	0.806142	0.00531793	Modellparzelle
4	B			11.5964	50.6277	0.808898	0.0171784	0.791865	0.0101297	Modellparzelle
4	B			11.5967	50.6277	0.839499	0.0127048	0.822869	0.00713022	Modellparzelle
4	B			11.5965	50.6277	0.809189	0.0145697	0.800835	0.00540276	Modellparzelle
4	B			11.5964	50.6277	0.815672	0.00970425	0.796788	0.0068022	Modellparzelle
4	B			11.5966	50.6277	0.835445	0.015158	0.822694	0.00736141	Modellparzelle
4	B			11.5965	50.6277	0.802416	0.0223162	0.800311	0.00750133	Modellparzelle
4	B			11.5964	50.6277	0.815448	0.0161341	0.799761	0.00758694	Modellparzelle
4	B			11.5966	50.6277	0.828996	0.0141199	0.819447	0.00767254	Modellparzelle
4	B			11.5965	50.6277	0.793265	0.0232294	0.794701	0.00791735	Modellparzelle
4	B			11.5964	50.6277	0.813791	0.0126225	0.796714	0.00820184	Modellparzelle
4	B			11.5966	50.6277	0.824711	0.0137945	0.812568	0.00650421	Modellparzelle
4	B			11.5965	50.6277	0.785633	0.0177399	0.785493	0.00927847	Modellparzelle
4	B			11.5964	50.6277	0.801868	0.0129496	0.786963	0.00848125	Modellparzelle
4	B			11.5966	50.6276	0.822544	0.0166834	0.810237	0.00870633	Modellparzelle
4	B			11.5965	50.6277	0.762182	0.0236753	0.775404	0.00894462	Modellparzelle
4	B			11.5964	50.6277	0.797872	0.0107749	0.785549	0.00869092	Modellparzelle
4	B			11.5966	50.6276	0.823983	0.0183341	0.813333	0.00816091	Modellparzelle
4	B			11.5965	50.6276	0.751577	0.0271585	0.775014	0.0116189	Modellparzelle
4	B			11.5964	50.6277	0.800175	0.0152134	0.790354	0.00858081	Modellparzelle
4	B			11.5966	50.6276	0.821944	0.0202543	0.812367	0.00973912	Modellparzelle
4	B			11.5965	50.6276	0.761408	0.0266851	0.780277	0.0106595	Modellparzelle
4	B			11.5964	50.6276	0.807846	0.0109351	0.792347	0.00619283	Modellparzelle
4	B			11.5965	50.628	0.828257	0.0239173	0.800981	0.00750163	Modellparzelle
4	B			11.5966	50.628	0.83405	0.00762845	0.807909	0.00471441	Modellparzelle
4	B			11.5967	50.628	0.843256	0.00779309	0.817629	0.0067268	Modellparzelle
4	B			11.5965	50.628	0.820739	0.0242415	0.794194	0.00737651	Modellparzelle
4	B			11.5966	50.628	0.829735	0.00662105	0.804666	0.00458489	Modellparzelle
4	B			11.5967	50.628	0.828578	0.0198682	0.810494	0.00803869	Modellparzelle
4	B			11.5965	50.628	0.821143	0.0188659	0.795252	0.0052304	Modellparzelle
4	B			11.5966	50.628	0.823495	0.0114738	0.796107	0.00916057	Modellparzelle
4	B			11.5967	50.628	0.836121	0.0160826	0.810099	0.00920144	Modellparzelle
4	B			11.5965	50.628	0.815243	0.0226106	0.789463	0.007562	Modellparzelle
4	B			11.5966	50.628	0.815776	0.0158602	0.782649	0.011984	Modellparzelle
4	B			11.5967	50.628	0.846472	0.0118091	0.812631	0.0122	Modellparzelle
4	B			11.5965	50.628	0.811786	0.0282231	0.788593	0.00666644	Modellparzelle
4	B			11.5966	50.628	0.816992	0.0147854	0.781009	0.00993934	Modellparzelle
4	B			11.5967	50.628	0.84589	0.0203492	0.814611	0.0124632	Modellparzelle
4	B			11.5965	50.628	0.807588	0.0318331	0.781871	0.00878085	Modellparzelle
4	B			11.5966	50.628	0.8199	0.0129547	0.781158	0.0101216	Modellparzelle
4	B			11.5968	50.628	0.836196	0.0441498	0.81581	0.00685714	Modellparzelle
4	B			11.5965	50.6281	0.800805	0.0344278	0.775997	0.0100048	Modellparzelle
4	B			11.5966	50.628	0.827317	0.0139007	0.786826	0.0123387	Modellparzelle
4	B			11.5968	50.628	0.844464	0.0250328	0.813374	0.00544149	Modellparzelle
4	B			11.5965	50.6281	0.809219	0.0287101	0.77859	0.00886588	Modellparzelle
4	B			11.5967	50.6281	0.8253	0.0147068	0.789755	0.0110331	Modellparzelle
4	B			11.5968	50.628	0.842023	0.00984964	0.808723	0.00557776	Modellparzelle
4	B			11.5966	50.6281	0.819111	0.0207924	0.788784	0.00556379	Modellparzelle
4	B			11.5967	50.6281	0.809926	0.0148569	0.781187	0.0113727	Modellparzelle
4	B			11.5968	50.6281	0.831645	0.0243477	0.804176	0.00571283	Modellparzelle
4	B			11.5966	50.6281	0.823199	0.0218065	0.79336	0.00658539	Modellparzelle
4	B			11.5967	50.6281	0.796714	0.0187302	0.773369	0.0139168	Modellparzelle
4	B			11.5968	50.6281	0.838363	0.0089167	0.803904	0.00537326	Modellparzelle
4	B			11.5966	50.6281	0.819137	0.0160385	0.791934	0.00787083	Modellparzelle
4	B			11.5967	50.6281	0.789375	0.0245678	0.768484	0.0146937	Modellparzelle
4	B			11.5968	50.6281	0.839378	0.0141869	0.805472	0.0126764	Modellparzelle
4	B			11.5966	50.6281	0.802057	0.0427606	0.789826	0.0113476	Modellparzelle
4	B			11.5967	50.6281	0.783313	0.031054	0.765049	0.0173962	Modellparzelle
4	B			11.5968	50.6281	0.839259	0.0147309	0.809295	0.0124901	Modellparzelle
4	B			11.5966	50.6281	0.790796	0.0734534	0.788649	0.0148036	Modellparzelle
4	B			11.5967	50.6281	0.785988	0.0306864	0.769805	0.015663	Modellparzelle
4	B			11.5968	50.6281	0.835055	0.0134687	0.802717	0.0100852	Modellparzelle
4	B			11.5966	50.6281	0.799748	0.0669341	0.7879	0.0128663	Modellparzelle
4	B			11.5967	50.6281	0.798561	0.0267372	0.783786	0.0126813	Modellparzelle
4	B			11.5968	50.6281	0.829911	0.0157612	0.797102	0.0116117	Modellparzelle
4	B			11.5966	50.6282	0.826873	0.0116446	0.792784	0.00719569	Modellparzelle
4	B			11.5967	50.6281	0.788903	0.0360492	0.775716	0.0209313	Modellparzelle
4	B			11.5968	50.6281	0.830968	0.0198301	0.799404	0.01661	Modellparzelle
4	B			11.5966	50.6282	0.830055	0.0102977	0.792486	0.00651297	Modellparzelle
4	B			11.5967	50.6282	0.808852	0.0322836	0.782043	0.0190569	Modellparzelle
4	B			11.5968	50.6282	0.840157	0.0154267	0.807741	0.0138924	Modellparzelle
4	B			11.5966	50.6282	0.826979	0.0309514	0.794458	0.00917663	Modellparzelle
4	B			11.5967	50.6282	0.815702	0.0336598	0.787778	0.0185845	Modellparzelle
4	B			11.5968	50.6282	0.842506	0.014269	0.809074	0.0102244	Modellparzelle
4	B			11.5966	50.6282	0.823744	0.046621	0.802633	0.0092388	Modellparzelle
4	B			11.5967	50.6282	0.8175	0.0328862	0.788707	0.0222446	Modellparzelle
4	B			11.5968	50.6282	0.843146	0.0140007	0.810492	0.00946743	Modellparzelle
4	B			11.5966	50.6282	0.838005	0.0175497	0.799147	0.0113537	Modellparzelle
4	B			11.5967	50.6282	0.814258	0.0327026	0.782861	0.020982	Modellparzelle
4	B			11.5968	50.6282	0.845868	0.0140605	0.812104	0.0100853	Modellparzelle
4	B			11.5966	50.6282	0.841619	0.00655917	0.795424	0.00852633	Modellparzelle
4	B			11.5967	50.6282	0.825336	0.0195847	0.790825	0.0122611	Modellparzelle
4	B			11.5968	50.6282	0.845169	0.00990859	0.809452	0.0086296	Modellparzelle
4	B			11.5966	50.6282	0.845547	0.00661314	0.801151	0.00696352	Modellparzelle
4	B			11.5967	50.6282	0.834482	0.0161409	0.797726	0.00914368	Modellparzelle
4	B			11.5968	50.6282	0.845784	0.00933261	0.807422	0.00762861	Modellparzelle
4	B			11.5966	50.6283	0.840351	0.00921847	0.797733	0.00906489	Modellparzelle
4	B			11.5967	50.6282	0.837909	0.0131635	0.802276	0.0105008	Modellparzelle
4	B			11.5968	50.6282	0.847247	0.00791169	0.807335	0.00651201	Modellparzelle
4	B			11.5966	50.6283	0.835332	0.00909403	0.792223	0.0108141	Modellparzelle
4	B			11.5967	50.6283	0.834824	0.0112546	0.793772	0.00787133	Modellparzelle
4	B			11.5968	50.6282	0.852453	0.00880227	0.813111	0.00710781	Modellparzelle
4	B			11.5966	50.6283	0.834119	0.0111907	0.787747	0.0083953	Modellparzelle
4	B			11.5967	50.6283	0.832479	0.010948	0.786868	0.00724775	Modellparzelle
4	B			11.5968	50.6283	0.853444	0.0112571	0.818242	0.00764522	Modellparzelle
4	B			11.5966	50.6283	0.832674	0.0137575	0.783536	0.00909911	Modellparzelle
4	B			11.5967	50.6283	0.835484	0.0101315	0.79424	0.00589165	Modellparzelle
4	B			11.5968	50.6283	0.853475	0.0114445	0.818596	0.00570088	Modellparzelle
4	B			11.5966	50.6283	0.825869	0.0130938	0.779734	0.00990826	Modellparzelle
4	B			11.5967	50.6283	0.832394	0.0100347	0.793282	0.00616324	Modellparzelle
4	B			11.5968	50.6283	0.8531	0.00914057	0.814403	0.00594488	Modellparzelle
4	B			11.5966	50.6283	0.831731	0.00931668	0.786179	0.0076092	Modellparzelle
4	B			11.5967	50.6283	0.825917	0.0122167	0.78632	0.008621	Modellparzelle
4	B			11.5968	50.6283	0.854251	0.00901126	0.813388	0.00846636	Modellparzelle
4	B			11.5966	50.6283	0.834751	0.00758254	0.790836	0.00743873	Modellparzelle
4	B			11.5967	50.6283	0.821796	0.0103205	0.781317	0.00888069	Modellparzelle
4	B			11.5968	50.6283	0.856662	0.0105048	0.814422	0.00956141	Modellparzelle
4	B			11.5966	50.6283	0.836725	0.00860702	0.791306	0.00957313	Modellparzelle
4	B			11.5967	50.6283	0.819049	0.00934246	0.779293	0.00976598	Modellparzelle
4	B			11.5968	50.6283	0.857584	0.00994023	0.817696	0.00818332	Modellparzelle
4	B			11.5966	50.6284	0.834843	0.00937214	0.785834	0.010164	Modellparzelle
4	B			11.5967	50.6283	0.820617	0.00803736	0.780712	0.00810786	Modellparzelle
4	B			11.5968	50.6283	0.858573	0.0074321	0.81797	0.00504441	Modellparzelle
4	B			11.5966	50.6284	0.829397	0.00757917	0.781456	0.00693212	Modellparzelle
4	B			11.5967	50.6284	0.823775	0.00878202	0.785124	0.00593179	Modellparzelle
4	B			11.5968	50.6284	0.859991	0.0116984	0.815437	0.0103553	Modellparzelle
4	B			11.5966	50.6284	0.828294	0.00887435	0.77959	0.00814421	Modellparzelle
4	B			11.5967	50.6284	0.825775	0.0108085	0.784041	0.00676921	Modellparzelle
4	B			11.5968	50.6284	0.86153	0.010768	0.818914	0.0122467	Modellparzelle
4	B			11.5966	50.6284	0.821848	0.0121739	0.772554	0.0142784	Modellparzelle
4	B			11.5967	50.6284	0.828848	0.0077058	0.784921	0.0088203	Modellparzelle
4	B			11.5968	50.6284	0.861288	0.00925428	0.821397	0.00895607	Modellparzelle
4	B			11.5966	50.6284	0.818706	0.0102289	0.765917	0.0118471	Modellparzelle
4	B			11.5967	50.6284	0.830126	0.00846446	0.789317	0.00768055	Modellparzelle
4	B			11.5968	50.6284	0.86466	0.0104917	0.822859	0.00886798	Modellparzelle
4	B			11.5966	50.6284	0.825578	0.0121845	0.772576	0.0111988	Modellparzelle
4	B			11.5967	50.6284	0.830657	0.0101036	0.791003	0.00860985	Modellparzelle
4	B			11.5968	50.6284	0.858449	0.00974669	0.818278	0.00792183	Modellparzelle
4	B			11.5966	50.6284	0.830026	0.010661	0.780889	0.00857397	Modellparzelle
4	B			11.5967	50.6284	0.83229	0.0116461	0.789775	0.00696011	Modellparzelle
4	B			11.5968	50.6284	0.84981	0.00959998	0.803685	0.0116424	Modellparzelle
4	B			11.5966	50.6285	0.830723	0.00978682	0.77864	0.00944864	Modellparzelle
4	B			11.5967	50.6284	0.825266	0.0107916	0.776462	0.00950953	Modellparzelle
4	B			11.5968	50.6284	0.849345	0.0103934	0.804595	0.0135874	Modellparzelle
4	B			11.5966	50.6285	0.830588	0.0095483	0.774887	0.0132762	Modellparzelle
4	B			11.5967	50.6285	0.824582	0.0109148	0.773258	0.0110773	Modellparzelle
4	B			11.5968	50.6284	0.853886	0.0107093	0.812199	0.0118199	Modellparzelle
4	B			11.5966	50.6285	0.821419	0.0121717	0.76301	0.0160591	Modellparzelle
4	B			11.5967	50.6285	0.836655	0.0109628	0.787493	0.0117251	Modellparzelle
4	B			11.5968	50.6285	0.855983	0.00729416	0.810642	0.00749407	Modellparzelle
4	B			11.5966	50.6285	0.816956	0.016094	0.760698	0.0153829	Modellparzelle
4	B			11.5967	50.6285	0.84519	0.0090655	0.798523	0.00952249	Modellparzelle
4	B			11.5968	50.6285	0.858846	0.00647766	0.812713	0.00853656	Modellparzelle
4	B			11.5966	50.6285	0.809712	0.0669697	0.774909	0.014939	Modellparzelle
4	B			11.5967	50.6285	0.842804	0.0110797	0.792157	0.0113596	Modellparzelle
4	B			11.5968	50.6285	0.85959	0.00635949	0.813856	0.00790046	Modellparzelle
4	B			11.5966	50.6285	0.825933	0.0392744	0.774859	0.0175073	Modellparzelle
4	B			11.5967	50.6285	0.837044	0.0105562	0.783559	0.0150791	Modellparzelle
4	B			11.5968	50.6285	0.850648	0.0130321	0.806281	0.0125355	Modellparzelle
4	B			11.5966	50.6285	0.839263	0.0121229	0.775159	0.0171205	Modellparzelle
4	B			11.5967	50.6285	0.83209	0.00800784	0.776235	0.00704927	Modellparzelle
4	B			11.5969	50.6285	0.843225	0.017834	0.795923	0.0227036	Modellparzelle
4	B			11.5966	50.6285	0.844401	0.00926483	0.781125	0.0101795	Modellparzelle
4	B			11.5967	50.6285	0.835571	0.00810503	0.778954	0.00900995	Modellparzelle
4	B			11.5969	50.6285	0.848612	0.0115577	0.801012	0.0149646	Modellparzelle
4	B			11.5966	50.6286	0.83929	0.00837028	0.775036	0.00902669	Modellparzelle
4	B			11.5967	50.6286	0.840325	0.0102863	0.786504	0.0103477	Modellparzelle
4	B			11.5969	50.6285	0.846359	0.00837056	0.79404	0.011689	Modellparzelle
4	B			11.5966	50.6286	0.8375	0.00865801	0.772456	0.00684249	Modellparzelle
4	B			11.5968	50.6286	0.840395	0.0078612	0.782318	0.00720362	Modellparzelle
4	B			11.5969	50.6286	0.838317	0.00694287	0.78148	0.00818265	Modellparzelle
4	B			11.5966	50.6286	0.838154	0.00947946	0.771469	0.00889778	Modellparzelle
4	B			11.5968	50.6286	0.836951	0.0101208	0.775362	0.0112805	Modellparzelle
4	B			11.5969	50.6286	0.843299	0.00893626	0.789739	0.00881902	Modellparzelle
4	B			11.5966	50.6286	0.841736	0.0111111	0.774037	0.015412	Modellparzelle
4	B			11.5968	50.6286	0.828571	0.0104971	0.762555	0.015458	Modellparzelle
4	B			11.5969	50.6286	0.848746	0.00707442	0.798107	0.00725949	Modellparzelle
4	B			11.5966	50.6286	0.844894	0.0107087	0.776308	0.0135849	Modellparzelle
4	B			11.5968	50.6286	0.824067	0.0133312	0.760246	0.0187665	Modellparzelle
4	B			11.5969	50.6286	0.850795	0.00611019	0.799056	0.00501454	Modellparzelle
4	B			11.5966	50.6286	0.849713	0.00804684	0.782229	0.0106697	Modellparzelle
4	B			11.5968	50.6286	0.819657	0.0133063	0.75777	0.011333	Modellparzelle
4	B			11.5969	50.6286	0.853714	0.00899069	0.799492	0.0107678	Modellparzelle
4	B			11.5967	50.6286	0.850324	0.0108601	0.781095	0.0135395	Modellparzelle
4	B			11.5968	50.6286	0.815243	0.023049	0.758544	0.0139813	Modellparzelle
4	B			11.5969	50.6286	0.857002	0.0118351	0.802557	0.0149135	Modellparzelle
4	B			11.5967	50.6287	0.853761	0.00864805	0.787175	0.0123174	Modellparzelle
4	B			11.5968	50.6286	0.804029	0.0293026	0.752642	0.0191846	Modellparzelle
4	B			11.5969	50.6286	0.859515	0.0102337	0.806672	0.00953033	Modellparzelle
4	B			11.5967	50.6287	0.85841	0.0101665	0.792984	0.0115419	Modellparzelle
4	B			11.5968	50.6287	0.810605	0.0231931	0.761147	0.0163006	Modellparzelle
4	B			11.5969	50.6286	0.860467	0.00943625	0.805391	0.00853916	Modellparzelle
4	B			11.5967	50.6287	0.867141	0.0107565	0.802981	0.0152199	Modellparzelle
4	B			11.5968	50.6287	0.800053	0.0302632	0.756245	0.0196136	Modellparzelle
4	B			11.5969	50.6287	0.859961	0.0104954	0.803054	0.00914375	Modellparzelle
4	B			11.5967	50.6287	0.869521	0.00888385	0.808309	0.0143812	Modellparzelle
4	B			11.5968	50.6287	0.792937	0.0365563	0.75125	0.0247723	Modellparzelle
4	B			11.5969	50.6287	0.858273	0.0125867	0.803931	0.00993715	Modellparzelle
4	B			11.5967	50.6287	0.867231	0.00809969	0.805868	0.0105754	Modellparzelle
4	B			11.5968	50.6287	0.786028	0.0381247	0.750788	0.0192003	Modellparzelle
4	B			11.5969	50.6287	0.853837	0.0185063	0.80348	0.0104917	Modellparzelle
4	B			11.5967	50.6287	0.86508	0.00981048	0.801455	0.0121714	Modellparzelle
4	B			11.5968	50.6287	0.76645	0.0466303	0.739546	0.0166823	Modellparzelle
4	B			11.5969	50.6287	0.851128	0.0271808	0.803704	0.0164413	Modellparzelle
4	B			11.5967	50.6287	0.863987	0.0105597	0.800297	0.0158985	Modellparzelle
4	B			11.5968	50.6287	0.766698	0.0497732	0.741176	0.0184544	Modellparzelle
4	B			11.5969	50.6287	0.845344	0.0328535	0.801513	0.0186004	Modellparzelle
4	B			11.5967	50.6287	0.86609	0.0112408	0.802554	0.0183236	Modellparzelle
4	B			11.5968	50.6287	0.761457	0.0527641	0.743673	0.0188391	Modellparzelle
4	B			11.5969	50.6287	0.844038	0.0233498	0.801159	0.0126806	Modellparzelle
4	B			11.5967	50.6288	0.866021	0.00773638	0.805094	0.0131068	Modellparzelle
4	B			11.5968	50.6288	0.766995	0.0482417	0.745967	0.0207938	Modellparzelle
4	B			11.5969	50.6287	0.839159	0.021403	0.793764	0.0110222	Modellparzelle
4	B			11.5967	50.6288	0.863158	0.00770926	0.803439	0.0102185	Modellparzelle
4	B			11.5968	50.6288	0.769736	0.0478927	0.744484	0.0264468	Modellparzelle
4	B			11.5969	50.6288	0.842237	0.0169586	0.793217	0.00919855	Modellparzelle
4	B			11.5967	50.6288	0.859767	0.00836028	0.798966	0.00891281	Modellparzelle
4	B			11.5968	50.6288	0.779819	0.0407161	0.753261	0.0187459	Modellparzelle
4	B			11.5969	50.6288	0.84065	0.0180629	0.792316	0.0118892	Modellparzelle
4	B			11.5967	50.6288	0.860745	0.00861953	0.798897	0.0105423	Modellparzelle
4	B			11.5968	50.6288	0.789898	0.0382126	0.75339	0.0168595	Modellparzelle
4	B			11.5969	50.6288	0.83898	0.0188542	0.788712	0.0140613	Modellparzelle
4	B			11.5967	50.6288	0.865363	0.00648176	0.802339	0.00734056	Modellparzelle
4	B			11.5968	50.6288	0.808935	0.0346402	0.761078	0.019479	Modellparzelle
4	B			11.5969	50.6288	0.847905	0.0107129	0.791361	0.0103507	Modellparzelle
4	B			11.5967	50.6288	0.868461	0.00635605	0.806009	0.0065305	Modellparzelle
4	B			11.5968	50.6288	0.818871	0.0299477	0.769588	0.0157938	Modellparzelle
4	B			11.5969	50.6288	0.851546	0.010605	0.797912	0.00906733	Modellparzelle
4	B			11.5967	50.6288	0.868378	0.00706253	0.806864	0.00673103	Modellparzelle
4	B			11.5968	50.6288	0.818907	0.0324658	0.774887	0.0164096	Modellparzelle
4	B			11.5969	50.6288	0.852411	0.00892023	0.802034	0.00760639	Modellparzelle
4	B			11.5967	50.6289	0.867204	0.00703868	0.80617	0.00686951	Modellparzelle
4	B			11.5968	50.6288	0.811405	0.0394995	0.769135	0.0212684	Modellparzelle
4	B			11.5969	50.6288	0.850196	0.0110694	0.797607	0.010272	Modellparzelle
4	B			11.5967	50.6289	0.866821	0.00625247	0.802879	0.00850706	Modellparzelle
4	B			11.5968	50.6289	0.816723	0.0329566	0.763583	0.0192057	Modellparzelle
4	B			11.5969	50.6289	0.850704	0.0127102	0.798431	0.0136118	Modellparzelle
4	B			11.5967	50.6289	0.864914	0.00757887	0.794568	0.0176246	Modellparzelle
4	B			11.5968	50.6289	0.816673	0.0267631	0.754198	0.0139191	Modellparzelle
4	B			11.5969	50.6289	0.851519	0.0102892	0.796946	0.0127783	Modellparzelle
4	B			11.5967	50.6289	0.867186	0.00527658	0.797986	0.00808574	Modellparzelle
4	B			11.5968	50.6289	0.816982	0.0283145	0.753418	0.0184944	Modellparzelle
4	B			11.5969	50.6289	0.849631	0.0120004	0.798999	0.0126722	Modellparzelle
4	B			11.5967	50.6289	0.867572	0.00671915	0.797253	0.00803327	Modellparzelle
4	B			11.5968	50.6289	0.825191	0.0253413	0.763852	0.0183424	Modellparzelle
4	B			11.5969	50.6289	0.848707	0.0122371	0.79586	0.0144214	Modellparzelle
4	B			11.5967	50.6289	0.864978	0.00786371	0.793543	0.00978719	Modellparzelle
4	B			11.5968	50.6289	0.817336	0.0339625	0.761927	0.021887	Modellparzelle
4	B			11.5969	50.6289	0.850464	0.013822	0.795369	0.0172685	Modellparzelle
4	B			11.5967	50.6289	0.862994	0.00797627	0.791795	0.00765811	Modellparzelle
4	B			11.5968	50.6289	0.820677	0.0325714	0.76324	0.0205144	Modellparzelle
4	B			11.5969	50.6289	0.854103	0.0117875	0.798443	0.0144392	Modellparzelle
4	B			11.5967	50.629	0.86584	0.00776464	0.795713	0.00850349	Modellparzelle
4	B			11.5968	50.6289	0.831026	0.0255759	0.767414	0.0150127	Modellparzelle
4	B			11.5969	50.6289	0.850414	0.0146042	0.792375	0.0182297	Modellparzelle
4	B			11.5967	50.629	0.871229	0.00525499	0.800173	0.00684122	Modellparzelle
4	B			11.5968	50.629	0.83888	0.0263297	0.773624	0.0176948	Modellparzelle
4	B			11.5969	50.6289	0.842986	0.0143162	0.786278	0.0159096	Modellparzelle
4	B			11.5967	50.629	0.873147	0.00676768	0.800197	0.0112124	Modellparzelle
4	B			11.5968	50.629	0.841226	0.0276453	0.776457	0.0188836	Modellparzelle
4	B			11.5969	50.629	0.843837	0.0145049	0.790191	0.0124191	Modellparzelle
4	B			11.5967	50.629	0.875487	0.0057455	0.805685	0.00845198	Modellparzelle
4	B			11.5968	50.629	0.837056	0.0274604	0.777411	0.0170304	Modellparzelle
4	B			11.5969	50.629	0.847254	0.0159298	0.796397	0.0146133	Modellparzelle
4	B			11.5967	50.629	0.872772	0.00802901	0.806177	0.00957498	Modellparzelle
4	B			11.5968	50.629	0.830369	0.0233159	0.77386	0.012767	Modellparzelle
4	B			11.5969	50.629	0.848063	0.0143272	0.796897	0.0127871	Modellparzelle
4	B			11.5967	50.629	0.86249	0.0124941	0.795885	0.0177923	Modellparzelle
4	B			11.5968	50.629	0.827914	0.0128146	0.770855	0.0063471	Modellparzelle
4	B			11.5969	50.629	0.846654	0.0137345	0.79516	0.0117704	Modellparzelle
4	B			11.5967	50.629	0.854382	0.0141804	0.787918	0.0182175	Modellparzelle
4	B			11.5968	50.629	0.821869	0.0130834	0.768021	0.00725215	Modellparzelle
4	B			11.5969	50.629	0.841371	0.0193826	0.78976	0.0158401	Modellparzelle
4	B			11.5967	50.629	0.84997	0.0103994	0.787105	0.0151291	Modellparzelle
4	B			11.5968	50.629	0.820506	0.0170605	0.769262	0.00975197	Modellparzelle
4	B			11.5969	50.629	0.840904	0.0171255	0.789689	0.0167065	Modellparzelle
4	B			11.5967	50.6291	0.849001	0.00982513	0.791802	0.0121515	Modellparzelle
4	B			11.5968	50.6291	0.824772	0.0155076	0.777141	0.0085548	Modellparzelle
4	B			11.5969	50.629	0.849111	0.0126381	0.800791	0.0111389	Modellparzelle
4	B			11.5967	50.6291	0.848889	0.00768979	0.793085	0.00644345	Modellparzelle
4	B			11.5968	50.6291	0.834415	0.0151115	0.787386	0.0088313	Modellparzelle
4	B			11.5969	50.6291	0.850409	0.0138971	0.800223	0.0102278	Modellparzelle
4	B			11.5967	50.6291	0.844498	0.0116818	0.787733	0.00691429	Modellparzelle
4	B			11.5968	50.6291	0.834291	0.0142241	0.782053	0.00833419	Modellparzelle
4	B			11.5969	50.6291	0.85339	0.0124722	0.800622	0.00968705	Modellparzelle
4	B			11.5967	50.6291	0.834821	0.0188927	0.779261	0.00681634	Modellparzelle
4	B			11.5968	50.6291	0.832151	0.011892	0.777432	0.00706553	Modellparzelle
4	B			11.5969	50.6291	0.854574	0.0103271	0.798535	0.0100425	Modellparzelle
4	B			11.5967	50.6291	0.835993	0.017675	0.778835	0.00540724	Modellparzelle
4	B			11.5968	50.6291	0.839171	0.00924633	0.7826	0.00610738	Modellparzelle
4	B			11.5969	50.6291	0.854992	0.00949522	0.802437	0.00773333	Modellparzelle
6	B			11.5963	50.6279	0.850239	0.0134774	0.8193	0.0110161	Modellparzelle
6	B			11.5962	50.628	0.820905	0.0192471	0.794714	0.00574556	Modellparzelle
6	B			11.5961	50.628	0.803376	0.0199991	0.763732	0.0180362	Modellparzelle
6	B			11.5963	50.6279	0.845267	0.0125099	0.815454	0.0111041	Modellparzelle
6	B			11.5962	50.6279	0.820962	0.0146805	0.790906	0.00801228	Modellparzelle
6	B			11.5961	50.628	0.805517	0.0141389	0.766694	0.00953998	Modellparzelle
6	B			11.5963	50.6279	0.842191	0.0109182	0.811885	0.0118498	Modellparzelle
6	B			11.5962	50.6279	0.824993	0.0114877	0.7936	0.00504165	Modellparzelle
6	B			11.5961	50.6279	0.820747	0.0119972	0.780701	0.00757373	Modellparzelle
6	B			11.5963	50.6279	0.84234	0.00955898	0.811587	0.0100068	Modellparzelle
6	B			11.5962	50.6279	0.828936	0.00871534	0.795682	0.00645914	Modellparzelle
6	B			11.5961	50.6279	0.827258	0.0103917	0.788545	0.00727743	Modellparzelle
6	B			11.5963	50.6279	0.837472	0.0117608	0.807703	0.0125565	Modellparzelle
6	B			11.5962	50.6279	0.829343	0.0128398	0.797711	0.0075769	Modellparzelle
6	B			11.5961	50.6279	0.836412	0.00693627	0.798442	0.00500232	Modellparzelle
6	B			11.5963	50.6279	0.838144	0.0135559	0.810919	0.0118797	Modellparzelle
6	B			11.5962	50.6279	0.826471	0.0154924	0.800031	0.00783999	Modellparzelle
6	B			11.5961	50.6279	0.838858	0.00634786	0.801842	0.00509405	Modellparzelle
6	B			11.5963	50.6279	0.839965	0.0107703	0.814706	0.00938825	Modellparzelle
6	B			11.5962	50.6279	0.820503	0.0149192	0.796827	0.00791641	Modellparzelle
6	B			11.5961	50.6279	0.839568	0.00774766	0.804259	0.00644956	Modellparzelle
6	B			11.5963	50.6279	0.83738	0.0145701	0.813183	0.0159158	Modellparzelle
6	B			11.5962	50.6279	0.825392	0.0102683	0.800733	0.00445991	Modellparzelle
6	B			11.5961	50.6279	0.837597	0.00802281	0.800061	0.00879331	Modellparzelle
6	B			11.5963	50.6278	0.840183	0.0138592	0.817899	0.012073	Modellparzelle
6	B			11.5962	50.6278	0.83162	0.0100816	0.805668	0.00481829	Modellparzelle
6	B			11.5961	50.6279	0.830306	0.0121597	0.79396	0.00956638	Modellparzelle
6	B			11.5963	50.6278	0.83998	0.00932683	0.816108	0.00763316	Modellparzelle
6	B			11.5962	50.6278	0.838141	0.00750312	0.812726	0.0052342	Modellparzelle
6	B			11.5961	50.6278	0.81838	0.0149698	0.783761	0.0121865	Modellparzelle
6	B			11.5963	50.6278	0.840436	0.00715554	0.818372	0.00646508	Modellparzelle
6	B			11.5962	50.6278	0.838059	0.00854313	0.812792	0.00831246	Modellparzelle
6	B			11.5961	50.6278	0.819792	0.0134489	0.78506	0.0115693	Modellparzelle
6	B			11.5963	50.6278	0.835349	0.0079375	0.811462	0.00629117	Modellparzelle
6	B			11.5962	50.6278	0.838405	0.00746718	0.810476	0.00522345	Modellparzelle
6	B			11.5961	50.6278	0.821337	0.0110043	0.790847	0.0086537	Modellparzelle
6	B			11.5963	50.6278	0.831285	0.00847938	0.809022	0.00597999	Modellparzelle
6	B			11.5962	50.6278	0.835405	0.00776216	0.810005	0.00587523	Modellparzelle
6	B			11.5961	50.6278	0.83128	0.0098679	0.797054	0.00588285	Modellparzelle
6	B			11.5963	50.6278	0.832201	0.00849153	0.812854	0.0041272	Modellparzelle
6	B			11.5962	50.6278	0.832341	0.00901655	0.808462	0.00993617	Modellparzelle
6	B			11.5961	50.6278	0.83457	0.00873001	0.798263	0.00664776	Modellparzelle
6	B			11.5963	50.6278	0.837214	0.00798223	0.813905	0.00384815	Modellparzelle
6	B			11.5962	50.6278	0.826281	0.00740761	0.803471	0.00701862	Modellparzelle
6	B			11.5961	50.6278	0.830937	0.0113303	0.793415	0.0116659	Modellparzelle
6	B			11.5963	50.6277	0.839704	0.008828	0.817174	0.00502404	Modellparzelle
6	B			11.5962	50.6278	0.825206	0.00773654	0.801586	0.00704373	Modellparzelle
6	B			11.5961	50.6278	0.82438	0.0122873	0.786356	0.0106599	Modellparzelle
6	B			11.5963	50.6277	0.839104	0.0101346	0.816776	0.00656313	Modellparzelle
6	B			11.5962	50.6277	0.819228	0.0111503	0.794451	0.00984767	Modellparzelle
6	B			11.5961	50.6278	0.819234	0.00934798	0.785489	0.00624668	Modellparzelle
6	B			11.5963	50.6277	0.834232	0.0117007	0.814339	0.00989978	Modellparzelle
6	B			11.5962	50.6277	0.815672	0.0134081	0.794369	0.00887025	Modellparzelle
6	B			11.5961	50.6277	0.815346	0.00988134	0.786255	0.00900547	Modellparzelle
6	B			11.5963	50.6277	0.832619	0.0178964	0.809392	0.0134348	Modellparzelle
6	B			11.5962	50.6277	0.822318	0.0149796	0.798826	0.012377	Modellparzelle
6	B			11.5961	50.6277	0.806077	0.0117053	0.778193	0.00840173	Modellparzelle
6	B			11.5963	50.6277	0.830776	0.0249633	0.809236	0.0125069	Modellparzelle
6	B			11.5962	50.6277	0.822718	0.0105119	0.802336	0.00871232	Modellparzelle
6	B			11.596	50.6277	0.806066	0.0109641	0.773501	0.00890639	Modellparzelle
6	B			11.5963	50.6277	0.831902	0.0284672	0.812041	0.0145596	Modellparzelle
6	B			11.5962	50.6277	0.81673	0.0109366	0.798661	0.0100079	Modellparzelle
6	B			11.596	50.6277	0.805845	0.0155073	0.776237	0.0110159	Modellparzelle
6	B			11.5963	50.6277	0.832159	0.0282441	0.812728	0.0160732	Modellparzelle
6	B			11.5961	50.6277	0.821122	0.0120036	0.800314	0.0117306	Modellparzelle
6	B			11.596	50.6277	0.808535	0.0113444	0.777202	0.0105956	Modellparzelle
6	B			11.5963	50.6277	0.829287	0.0265952	0.808001	0.0190086	Modellparzelle
6	B			11.5961	50.6277	0.826725	0.0105813	0.804796	0.00756255	Modellparzelle
6	B			11.596	50.6277	0.804302	0.0126543	0.780156	0.0108294	Modellparzelle
6	B			11.5961	50.628	0.822017	0.0113327	0.784556	0.00798779	Modellparzelle
6	B			11.5962	50.628	0.819857	0.0219455	0.795361	0.00768042	Modellparzelle
6	B			11.5963	50.628	0.852971	0.0115859	0.820762	0.00906862	Modellparzelle
6	B			11.5961	50.628	0.82936	0.00797222	0.792694	0.00624503	Modellparzelle
6	B			11.5962	50.628	0.821037	0.0210183	0.79891	0.00851888	Modellparzelle
6	B			11.5964	50.628	0.850823	0.0127004	0.818156	0.0103311	Modellparzelle
6	B			11.5961	50.628	0.827604	0.00780287	0.795098	0.00658108	Modellparzelle
6	B			11.5963	50.628	0.821214	0.027372	0.795994	0.0100526	Modellparzelle
6	B			11.5964	50.628	0.851215	0.0101742	0.818461	0.00949763	Modellparzelle
6	B			11.5962	50.628	0.825109	0.00979337	0.791142	0.00605517	Modellparzelle
6	B			11.5963	50.628	0.825906	0.0195451	0.799637	0.0105485	Modellparzelle
6	B			11.5964	50.628	0.850498	0.0076525	0.819058	0.00637577	Modellparzelle
6	B			11.5962	50.628	0.824015	0.0151164	0.79426	0.00878537	Modellparzelle
6	B			11.5963	50.628	0.824447	0.0188751	0.79901	0.00836937	Modellparzelle
6	B			11.5964	50.628	0.845673	0.00743024	0.812578	0.00681216	Modellparzelle
6	B			11.5962	50.628	0.815908	0.0155225	0.795152	0.0117417	Modellparzelle
6	B			11.5963	50.628	0.815537	0.02577	0.793714	0.0116331	Modellparzelle
6	B			11.5964	50.628	0.84204	0.00944525	0.810933	0.00796568	Modellparzelle
6	B			11.5962	50.6281	0.822947	0.0103812	0.8007	0.0088508	Modellparzelle
6	B			11.5963	50.628	0.814246	0.0259226	0.79204	0.0130114	Modellparzelle
6	B			11.5964	50.628	0.840728	0.00831997	0.810473	0.00525505	Modellparzelle
6	B			11.5962	50.6281	0.827833	0.0108719	0.801222	0.00758066	Modellparzelle
6	B			11.5963	50.6281	0.820378	0.0193356	0.797519	0.0122447	Modellparzelle
6	B			11.5964	50.6281	0.838188	0.00868611	0.809763	0.00773749	Modellparzelle
6	B			11.5962	50.6281	0.836861	0.0117388	0.803612	0.00598329	Modellparzelle
6	B			11.5963	50.6281	0.816601	0.0238912	0.795588	0.00954516	Modellparzelle
6	B			11.5964	50.6281	0.835829	0.00800922	0.808813	0.00616626	Modellparzelle
6	B			11.5962	50.6281	0.846447	0.013938	0.80335	0.00735585	Modellparzelle
6	B			11.5963	50.6281	0.826186	0.0230401	0.801415	0.0070731	Modellparzelle
6	B			11.5964	50.6281	0.836541	0.00726422	0.808833	0.00480272	Modellparzelle
6	B			11.5962	50.6281	0.83873	0.0130573	0.805881	0.00887494	Modellparzelle
6	B			11.5963	50.6281	0.832349	0.0128752	0.808272	0.00490491	Modellparzelle
6	B			11.5964	50.6281	0.833632	0.0121045	0.804273	0.0100976	Modellparzelle
6	B			11.5962	50.6281	0.834882	0.0125339	0.805965	0.0104709	Modellparzelle
6	B			11.5963	50.6281	0.834433	0.0103417	0.81056	0.00588291	Modellparzelle
6	B			11.5964	50.6281	0.83826	0.0140461	0.805697	0.0121737	Modellparzelle
6	B			11.5962	50.6281	0.833306	0.0173655	0.807605	0.00872573	Modellparzelle
6	B			11.5963	50.6281	0.834511	0.0136834	0.808103	0.00874733	Modellparzelle
6	B			11.5964	50.6281	0.850157	0.00924589	0.818444	0.0105011	Modellparzelle
6	B			11.5962	50.6282	0.834851	0.0142725	0.808079	0.00681481	Modellparzelle
6	B			11.5963	50.6281	0.832289	0.0152288	0.804592	0.0128053	Modellparzelle
6	B			11.5964	50.6281	0.855915	0.00759793	0.823583	0.00457506	Modellparzelle
6	B			11.5962	50.6282	0.831008	0.0110597	0.803946	0.00567082	Modellparzelle
6	B			11.5963	50.6282	0.83654	0.0124416	0.807464	0.0146818	Modellparzelle
6	B			11.5964	50.6281	0.856352	0.0080346	0.822853	0.00500365	Modellparzelle
6	B			11.5962	50.6282	0.825166	0.011467	0.796656	0.00995195	Modellparzelle
6	B			11.5963	50.6282	0.842408	0.00624825	0.812473	0.00856525	Modellparzelle
6	B			11.5964	50.6282	0.854396	0.00777339	0.821528	0.0057177	Modellparzelle
6	B			11.5962	50.6282	0.820681	0.0106669	0.794281	0.0118502	Modellparzelle
6	B			11.5963	50.6282	0.83994	0.00813974	0.807588	0.00550792	Modellparzelle
6	B			11.5964	50.6282	0.848114	0.0097674	0.817348	0.00745582	Modellparzelle
6	B			11.5962	50.6282	0.822527	0.00822611	0.797882	0.00841563	Modellparzelle
6	B			11.5963	50.6282	0.829528	0.0123997	0.801282	0.00739279	Modellparzelle
6	B			11.5964	50.6282	0.842929	0.00983571	0.811517	0.00816378	Modellparzelle
6	B			11.5962	50.6282	0.822404	0.0111639	0.795088	0.0103317	Modellparzelle
6	B			11.5963	50.6282	0.826709	0.0120305	0.802084	0.00685543	Modellparzelle
6	B			11.5964	50.6282	0.833134	0.0117008	0.798853	0.00928075	Modellparzelle
6	B			11.5962	50.6282	0.822583	0.0104128	0.79079	0.0122023	Modellparzelle
6	B			11.5963	50.6282	0.8232	0.0119465	0.796311	0.00938778	Modellparzelle
6	B			11.5964	50.6282	0.82872	0.0150693	0.795035	0.0137034	Modellparzelle
6	B			11.5962	50.6282	0.823759	0.00826446	0.792233	0.0109487	Modellparzelle
6	B			11.5963	50.6282	0.819843	0.0128005	0.787508	0.0106091	Modellparzelle
6	B			11.5964	50.6282	0.835614	0.0151193	0.800992	0.0147417	Modellparzelle
6	B			11.5962	50.6283	0.820571	0.00847785	0.786527	0.0133914	Modellparzelle
6	B			11.5963	50.6282	0.820457	0.0136334	0.78531	0.00841672	Modellparzelle
6	B			11.5964	50.6282	0.843899	0.0114635	0.809149	0.0126334	Modellparzelle
6	B			11.5962	50.6283	0.824572	0.00795554	0.78667	0.0117701	Modellparzelle
6	B			11.5963	50.6283	0.824605	0.014601	0.788984	0.0103471	Modellparzelle
6	B			11.5964	50.6283	0.848429	0.00827952	0.811688	0.00749405	Modellparzelle
6	B			11.5962	50.6283	0.826478	0.00904485	0.786546	0.00799097	Modellparzelle
6	B			11.5963	50.6283	0.828723	0.0126529	0.795022	0.00785665	Modellparzelle
6	B			11.5964	50.6283	0.852375	0.00750794	0.814869	0.00645057	Modellparzelle
6	B			11.5962	50.6283	0.824538	0.0103209	0.780958	0.010061	Modellparzelle
6	B			11.5963	50.6283	0.838772	0.0096275	0.802419	0.00682189	Modellparzelle
6	B			11.5964	50.6283	0.856546	0.00655254	0.819325	0.00480159	Modellparzelle
6	B			11.5962	50.6283	0.825237	0.0118034	0.781032	0.0146902	Modellparzelle
6	B			11.5963	50.6283	0.847428	0.00879523	0.809781	0.00927771	Modellparzelle
6	B			11.5964	50.6283	0.858431	0.00741846	0.820128	0.00557784	Modellparzelle
6	B			11.5962	50.6283	0.830556	0.0110641	0.787417	0.0102523	Modellparzelle
6	B			11.5963	50.6283	0.851909	0.0066573	0.815381	0.00729954	Modellparzelle
6	B			11.5964	50.6283	0.859635	0.00551806	0.82008	0.00434608	Modellparzelle
6	B			11.5962	50.6283	0.838075	0.00969591	0.795766	0.00731375	Modellparzelle
6	B			11.5963	50.6283	0.851735	0.00542864	0.813529	0.00457642	Modellparzelle
6	B			11.5964	50.6283	0.856923	0.00559529	0.816205	0.00394597	Modellparzelle
6	B			11.5962	50.6284	0.84437	0.00861519	0.800228	0.00721547	Modellparzelle
6	B			11.5963	50.6283	0.85205	0.00699453	0.812131	0.00502211	Modellparzelle
6	B			11.5964	50.6283	0.857337	0.00660969	0.817432	0.00477001	Modellparzelle
6	B			11.5962	50.6284	0.844114	0.00788819	0.798226	0.00661483	Modellparzelle
6	B			11.5963	50.6284	0.854707	0.00605452	0.816035	0.00444438	Modellparzelle
6	B			11.5964	50.6283	0.852409	0.00772248	0.814974	0.00513791	Modellparzelle
6	B			11.5962	50.6284	0.848142	0.00706697	0.800876	0.00820153	Modellparzelle
6	B			11.5963	50.6284	0.84796	0.0112417	0.811652	0.00689117	Modellparzelle
6	B			11.5964	50.6284	0.84612	0.00958831	0.805863	0.0071202	Modellparzelle
6	B			11.5962	50.6284	0.850184	0.0108407	0.800068	0.0118893	Modellparzelle
6	B			11.5963	50.6284	0.838815	0.0198873	0.803175	0.0147192	Modellparzelle
6	B			11.5964	50.6284	0.847581	0.0104903	0.803319	0.00822778	Modellparzelle
6	B			11.5962	50.6284	0.855829	0.00907455	0.803683	0.00995832	Modellparzelle
6	B			11.5963	50.6284	0.831073	0.0220545	0.79541	0.0117225	Modellparzelle
6	B			11.5965	50.6284	0.854101	0.0117928	0.809253	0.0093	Modellparzelle
6	B			11.5962	50.6284	0.85435	0.00655993	0.797135	0.00821775	Modellparzelle
6	B			11.5963	50.6284	0.825021	0.0203791	0.786375	0.0103048	Modellparzelle
6	B			11.5965	50.6284	0.850857	0.0119306	0.804515	0.0142672	Modellparzelle
6	B			11.5962	50.6284	0.847611	0.00892187	0.784602	0.012406	Modellparzelle
6	B			11.5963	50.6284	0.827125	0.0263771	0.789139	0.0131627	Modellparzelle
6	B			11.5965	50.6284	0.854089	0.00914537	0.805775	0.00665356	Modellparzelle
6	B			11.5962	50.6284	0.845544	0.00781396	0.780785	0.00845488	Modellparzelle
6	B			11.5964	50.6284	0.821975	0.0309454	0.783074	0.0156819	Modellparzelle
6	B			11.5965	50.6284	0.851833	0.0115882	0.801812	0.00902693	Modellparzelle
6	B			11.5962	50.6285	0.842523	0.0114539	0.780643	0.0101737	Modellparzelle
6	B			11.5964	50.6284	0.825935	0.023762	0.780425	0.0150577	Modellparzelle
6	B			11.5965	50.6284	0.849559	0.0160297	0.798085	0.0148534	Modellparzelle
6	B			11.5962	50.6285	0.836171	0.0160979	0.778145	0.00852009	Modellparzelle
6	B			11.5964	50.6285	0.822303	0.0216034	0.771506	0.0167889	Modellparzelle
6	B			11.5965	50.6285	0.846237	0.017742	0.791643	0.0168875	Modellparzelle
6	B			11.5963	50.6285	0.823161	0.0182608	0.758569	0.0116535	Modellparzelle
6	B			11.5964	50.6285	0.829342	0.015013	0.770036	0.0109437	Modellparzelle
6	B			11.5965	50.6285	0.854563	0.0127309	0.79136	0.0146176	Modellparzelle
6	B			11.5963	50.6285	0.816953	0.018729	0.746507	0.0121349	Modellparzelle
6	B			11.5964	50.6285	0.848237	0.00898582	0.786259	0.00738411	Modellparzelle
6	B			11.5965	50.6285	0.867415	0.00868309	0.809167	0.00875605	Modellparzelle
6	B			11.5963	50.6285	0.82676	0.0178976	0.752536	0.0128225	Modellparzelle
6	B			11.5964	50.6285	0.855722	0.00795494	0.792154	0.0126708	Modellparzelle
6	B			11.5965	50.6285	0.8707	0.00548553	0.813348	0.00501538	Modellparzelle
6	B			11.5963	50.6285	0.840894	0.0189069	0.771682	0.0134995	Modellparzelle
6	B			11.5964	50.6285	0.858306	0.00799283	0.797917	0.0111731	Modellparzelle
6	B			11.5965	50.6285	0.867057	0.0059041	0.809781	0.0052124	Modellparzelle
6	B			11.5963	50.6285	0.848398	0.019003	0.786799	0.0113746	Modellparzelle
6	B			11.5964	50.6285	0.863917	0.00801874	0.804567	0.00877771	Modellparzelle
6	B			11.5965	50.6285	0.864326	0.00710576	0.803728	0.00794488	Modellparzelle
6	B			11.5963	50.6286	0.849399	0.0186903	0.790488	0.0113696	Modellparzelle
6	B			11.5964	50.6285	0.863125	0.00771412	0.803366	0.00701049	Modellparzelle
6	B			11.5965	50.6285	0.861614	0.00897719	0.800743	0.00887665	Modellparzelle
6	B			11.5963	50.6286	0.84664	0.0163985	0.786552	0.0127531	Modellparzelle
6	B			11.5964	50.6286	0.861032	0.00866571	0.799145	0.00672531	Modellparzelle
6	B			11.5965	50.6285	0.860954	0.00733736	0.800992	0.00994514	Modellparzelle
6	B			11.5963	50.6286	0.850203	0.011263	0.784968	0.00837624	Modellparzelle
6	B			11.5964	50.6286	0.859188	0.00923809	0.798105	0.00751218	Modellparzelle
6	B			11.5965	50.6286	0.86219	0.00646681	0.80264	0.00639459	Modellparzelle
6	B			11.5963	50.6286	0.858855	0.00896629	0.794778	0.00796871	Modellparzelle
6	B			11.5964	50.6286	0.856644	0.0083638	0.796473	0.00776142	Modellparzelle
6	B			11.5965	50.6286	0.862908	0.00590152	0.805145	0.00452735	Modellparzelle
6	B			11.5963	50.6286	0.857171	0.0116765	0.790262	0.0136143	Modellparzelle
6	B			11.5964	50.6286	0.849098	0.0100344	0.792206	0.00897065	Modellparzelle
6	B			11.5965	50.6286	0.864536	0.00647453	0.805265	0.00470696	Modellparzelle
6	B			11.5963	50.6286	0.854693	0.00816342	0.783306	0.00985118	Modellparzelle
6	B			11.5964	50.6286	0.844167	0.00765334	0.784472	0.00982998	Modellparzelle
6	B			11.5965	50.6286	0.864323	0.0154535	0.807249	0.00613312	Modellparzelle
6	B			11.5963	50.6286	0.855836	0.00915255	0.786755	0.0118502	Modellparzelle
6	B			11.5964	50.6286	0.841236	0.0114312	0.769889	0.0222644	Modellparzelle
6	B			11.5965	50.6286	0.868086	0.00904383	0.809901	0.0088152	Modellparzelle
6	B			11.5963	50.6286	0.855294	0.0107891	0.790359	0.0106314	Modellparzelle
6	B			11.5964	50.6286	0.842466	0.0110965	0.768398	0.0199419	Modellparzelle
6	B			11.5965	50.6286	0.869706	0.00767121	0.813004	0.00587459	Modellparzelle
6	B			11.5963	50.6287	0.849898	0.0143264	0.784336	0.0079947	Modellparzelle
6	B			11.5964	50.6287	0.853824	0.00894386	0.788403	0.00910428	Modellparzelle
6	B			11.5965	50.6286	0.875628	0.0109199	0.818891	0.00836143	Modellparzelle
6	B			11.5963	50.6287	0.852384	0.0200752	0.785853	0.0143007	Modellparzelle
6	B			11.5964	50.6287	0.859383	0.00895055	0.800632	0.00969622	Modellparzelle
6	B			11.5965	50.6287	0.881147	0.0114427	0.823513	0.00675563	Modellparzelle
6	B			11.5963	50.6287	0.853545	0.0192648	0.789135	0.0121904	Modellparzelle
6	B			11.5964	50.6287	0.862946	0.00751527	0.808302	0.00806513	Modellparzelle
6	B			11.5965	50.6287	0.87959	0.0124808	0.823557	0.00768718	Modellparzelle
6	B			11.5963	50.6287	0.84721	0.0174872	0.781111	0.0111568	Modellparzelle
6	B			11.5964	50.6287	0.863081	0.0089173	0.809611	0.0104817	Modellparzelle
6	B			11.5965	50.6287	0.879511	0.0124752	0.826226	0.00837999	Modellparzelle
6	B			11.5963	50.6287	0.842429	0.0187035	0.777457	0.0108528	Modellparzelle
6	B			11.5964	50.6287	0.862103	0.00865656	0.807007	0.0122598	Modellparzelle
6	B			11.5965	50.6287	0.874896	0.0124402	0.818403	0.012405	Modellparzelle
6	B			11.5963	50.6287	0.842853	0.0172434	0.779264	0.0102444	Modellparzelle
6	B			11.5964	50.6287	0.860879	0.00832654	0.804363	0.00747505	Modellparzelle
6	B			11.5965	50.6287	0.874945	0.00974518	0.818387	0.0077525	Modellparzelle
6	B			11.5963	50.6287	0.840733	0.0174619	0.776925	0.0112682	Modellparzelle
6	B			11.5964	50.6287	0.855073	0.0119611	0.801866	0.00550675	Modellparzelle
6	B			11.5965	50.6287	0.876302	0.0105759	0.819223	0.00703633	Modellparzelle
6	B			11.5963	50.6288	0.821168	0.0246211	0.759661	0.0204066	Modellparzelle
6	B			11.5964	50.6287	0.849179	0.0155928	0.795743	0.0073087	Modellparzelle
6	B			11.5965	50.6287	0.87408	0.012018	0.820229	0.0109046	Modellparzelle
6	B			11.5963	50.6288	0.805	0.0229593	0.740519	0.017606	Modellparzelle
6	B			11.5964	50.6288	0.842667	0.0156424	0.788067	0.00884526	Modellparzelle
6	B			11.5965	50.6288	0.871871	0.0131194	0.819052	0.0127277	Modellparzelle
6	B			11.5963	50.6288	0.81739	0.0130934	0.756467	0.0148524	Modellparzelle
6	B			11.5964	50.6288	0.836678	0.0178988	0.785085	0.00870268	Modellparzelle
6	B			11.5965	50.6288	0.8725	0.0121679	0.82056	0.0111715	Modellparzelle
6	B			11.5963	50.6288	0.834586	0.0102878	0.777352	0.00990183	Modellparzelle
6	B			11.5964	50.6288	0.835179	0.0216166	0.784686	0.00793308	Modellparzelle
6	B			11.5965	50.6288	0.871308	0.012789	0.821091	0.0107701	Modellparzelle
6	B			11.5963	50.6288	0.844145	0.00862826	0.78955	0.00718555	Modellparzelle
6	B			11.5964	50.6288	0.843842	0.0185097	0.794823	0.00668841	Modellparzelle
6	B			11.5965	50.6288	0.870376	0.0153442	0.817251	0.0116079	Modellparzelle
6	B			11.5963	50.6288	0.853506	0.0102516	0.798209	0.00905643	Modellparzelle
6	B			11.5964	50.6288	0.838244	0.0235464	0.795822	0.00795749	Modellparzelle
6	B			11.5965	50.6288	0.869793	0.0155928	0.816675	0.0120975	Modellparzelle
6	B			11.5963	50.6288	0.863009	0.00679032	0.811248	0.00587978	Modellparzelle
6	B			11.5964	50.6288	0.832637	0.0322453	0.794777	0.0119125	Modellparzelle
6	B			11.5965	50.6288	0.868608	0.0155978	0.815119	0.013712	Modellparzelle
6	B			11.5963	50.6288	0.864033	0.00598765	0.814677	0.0041477	Modellparzelle
6	B			11.5964	50.6288	0.834953	0.0316834	0.792196	0.0160198	Modellparzelle
6	B			11.5965	50.6288	0.866643	0.0165355	0.809841	0.0156048	Modellparzelle
6	B			11.5963	50.6289	0.863108	0.00660838	0.815602	0.00583477	Modellparzelle
6	B			11.5964	50.6289	0.834889	0.0378498	0.790255	0.0186234	Modellparzelle
6	B			11.5965	50.6288	0.867979	0.0145978	0.813426	0.0117695	Modellparzelle
6	B			11.5963	50.6289	0.858587	0.00818448	0.810068	0.0061868	Modellparzelle
6	B			11.5964	50.6289	0.837027	0.0469286	0.79519	0.0197871	Modellparzelle
6	B			11.5965	50.6289	0.871722	0.00999194	0.816187	0.00836491	Modellparzelle
6	B			11.5963	50.6289	0.856671	0.00925539	0.803252	0.009549	Modellparzelle
6	B			11.5964	50.6289	0.85095	0.0205696	0.802505	0.00944523	Modellparzelle
6	B			11.5965	50.6289	0.87503	0.00777076	0.822038	0.00711466	Modellparzelle
6	B			11.5963	50.6289	0.855191	0.00972897	0.800157	0.00864637	Modellparzelle
6	B			11.5964	50.6289	0.857263	0.0147166	0.809636	0.0058178	Modellparzelle
6	B			11.5965	50.6289	0.877144	0.00640853	0.823082	0.00627957	Modellparzelle
6	B			11.5963	50.6289	0.856803	0.0108318	0.799509	0.00917178	Modellparzelle
6	B			11.5964	50.6289	0.854195	0.0188249	0.806862	0.00675782	Modellparzelle
6	B			11.5965	50.6289	0.878181	0.00575045	0.825607	0.00604121	Modellparzelle
6	B			11.5963	50.6289	0.864397	0.0088841	0.805622	0.00826546	Modellparzelle
6	B			11.5964	50.6289	0.855749	0.0137349	0.801598	0.00567111	Modellparzelle
6	B			11.5965	50.6289	0.878817	0.00627159	0.826711	0.00623453	Modellparzelle
6	B			11.5963	50.6289	0.871548	0.00653711	0.811619	0.00513347	Modellparzelle
6	B			11.5964	50.6289	0.860126	0.0159549	0.807869	0.00633242	Modellparzelle
6	B			11.5965	50.6289	0.881365	0.00621861	0.828535	0.00667578	Modellparzelle
6	B			11.5963	50.629	0.87269	0.00682542	0.81151	0.00523572	Modellparzelle
6	B			11.5964	50.6289	0.862778	0.014995	0.810964	0.0059986	Modellparzelle
6	B			11.5965	50.6289	0.882823	0.00686773	0.830696	0.00910413	Modellparzelle
6	B			11.5963	50.629	0.86432	0.00981935	0.80305	0.0101413	Modellparzelle
6	B			11.5964	50.629	0.863675	0.0120275	0.810261	0.00546974	Modellparzelle
6	B			11.5965	50.629	0.88151	0.00484301	0.827664	0.00698104	Modellparzelle
6	B			11.5963	50.629	0.858254	0.0107389	0.796791	0.0117951	Modellparzelle
6	B			11.5964	50.629	0.863761	0.0135618	0.806222	0.00764947	Modellparzelle
6	B			11.5965	50.629	0.878502	0.00526461	0.818835	0.00482679	Modellparzelle
6	B			11.5963	50.629	0.859157	0.012145	0.794372	0.0134249	Modellparzelle
6	B			11.5964	50.629	0.869652	0.00615673	0.808354	0.010593	Modellparzelle
6	B			11.5965	50.629	0.882415	0.00485733	0.820284	0.00500734	Modellparzelle
6	B			11.5963	50.629	0.859877	0.0126709	0.796215	0.0112208	Modellparzelle
6	B			11.5964	50.629	0.873555	0.00561351	0.813782	0.0067179	Modellparzelle
6	B			11.5965	50.629	0.884328	0.00627459	0.824133	0.00643815	Modellparzelle
6	B			11.5963	50.629	0.856512	0.0173544	0.796087	0.0131939	Modellparzelle
6	B			11.5964	50.629	0.872181	0.00640558	0.811433	0.00944534	Modellparzelle
6	B			11.5965	50.629	0.88727	0.00680221	0.828269	0.0061077	Modellparzelle
6	B			11.5963	50.629	0.852554	0.0213875	0.795328	0.0167885	Modellparzelle
6	B			11.5964	50.629	0.86899	0.00818943	0.807824	0.0113733	Modellparzelle
6	B			11.5965	50.629	0.886026	0.00814216	0.827878	0.00581071	Modellparzelle
6	B			11.5963	50.6291	0.851804	0.025748	0.792884	0.0168704	Modellparzelle
6	B			11.5964	50.629	0.8628	0.0101965	0.805566	0.0167459	Modellparzelle
6	B			11.5965	50.629	0.886392	0.00934617	0.829855	0.00615612	Modellparzelle
6	B			11.5963	50.6291	0.854825	0.0349007	0.795837	0.0112367	Modellparzelle
6	B			11.5964	50.6291	0.848854	0.0128479	0.797115	0.0128734	Modellparzelle
6	B			11.5965	50.629	0.882821	0.0112591	0.826103	0.00786908	Modellparzelle
6	B			11.5963	50.6291	0.854909	0.0357198	0.794894	0.0108398	Modellparzelle
6	B			11.5964	50.6291	0.842143	0.0195988	0.791001	0.0107232	Modellparzelle
6	B			11.5965	50.6291	0.876649	0.0110981	0.817111	0.00782214	Modellparzelle
6	B			11.5963	50.6291	0.868033	0.0202539	0.808151	0.00956939	Modellparzelle
6	B			11.5964	50.6291	0.844873	0.0164843	0.788218	0.0109644	Modellparzelle
6	B			11.5965	50.6291	0.874642	0.00859448	0.812863	0.00650006	Modellparzelle
6	B			11.5963	50.6291	0.873031	0.0178953	0.816951	0.00781975	Modellparzelle
6	B			11.5964	50.6291	0.841086	0.023707	0.792016	0.0109579	Modellparzelle
6	B			11.5965	50.6291	0.87582	0.00870332	0.81422	0.00756731	Modellparzelle
6	B			11.5963	50.6291	0.872188	0.0146875	0.81707	0.00664567	Modellparzelle
6	B			11.5964	50.6291	0.842059	0.0237449	0.79202	0.011842	Modellparzelle
6	B			11.5965	50.6291	0.87824	0.0107724	0.816971	0.0099308	Modellparzelle
6	B			11.5963	50.6291	0.866633	0.0116185	0.81124	0.00950043	Modellparzelle
6	B			11.5964	50.6291	0.852354	0.0179974	0.797412	0.0102272	Modellparzelle
6	B			11.5965	50.6291	0.880112	0.00658886	0.818452	0.0065284	Modellparzelle
6	B			11.5963	50.6291	0.863989	0.00850838	0.80773	0.00506754	Modellparzelle
6	B			11.5964	50.6291	0.857275	0.0110303	0.802105	0.00694202	Modellparzelle
6	B			11.5965	50.6291	0.881432	0.00570477	0.824086	0.00468589	Modellparzelle
1	B			11.5959	50.6277	0.804083	0.016986	0.795746	0.0091581	Modellparzelle
1	B			11.5958	50.6277	0.79954	0.0137053	0.781379	0.00936742	Modellparzelle
1	B			11.5957	50.6277	0.801075	0.0313394	0.773224	0.0274826	Modellparzelle
1	B			11.5957	50.6277	0.793078	0.0353346	0.773332	0.0148445	Modellparzelle
1	B			11.5958	50.6277	0.800091	0.0178979	0.785262	0.0165508	Modellparzelle
1	B			11.5959	50.6277	0.809522	0.012439	0.796269	0.00966942	Modellparzelle
1	B			11.5957	50.6277	0.792093	0.0345844	0.771488	0.0183324	Modellparzelle
1	B			11.5958	50.6277	0.803726	0.0162359	0.788655	0.01232	Modellparzelle
1	B			11.5959	50.6277	0.814723	0.0145151	0.801486	0.0090928	Modellparzelle
1	B			11.5957	50.6277	0.799664	0.026537	0.774909	0.0205161	Modellparzelle
1	B			11.5958	50.6277	0.804466	0.0136044	0.792137	0.00906072	Modellparzelle
1	B			11.5959	50.6277	0.817562	0.014463	0.801162	0.00646584	Modellparzelle
1	B			11.5957	50.6278	0.80549	0.0234379	0.782394	0.0150653	Modellparzelle
1	B			11.5958	50.6277	0.804968	0.0116349	0.793111	0.00758924	Modellparzelle
1	B			11.5959	50.6277	0.81907	0.0150871	0.801118	0.00830264	Modellparzelle
1	B			11.5957	50.6278	0.808089	0.0305221	0.789478	0.0191604	Modellparzelle
1	B			11.5958	50.6278	0.796233	0.0160375	0.787062	0.0157621	Modellparzelle
1	B			11.5959	50.6278	0.823263	0.0151818	0.805964	0.00803293	Modellparzelle
1	B			11.5957	50.6278	0.806595	0.0274235	0.787847	0.0139431	Modellparzelle
1	B			11.5958	50.6278	0.791693	0.0188243	0.790661	0.017726	Modellparzelle
1	B			11.5959	50.6278	0.826003	0.0167017	0.808795	0.00917965	Modellparzelle
1	B			11.5957	50.6278	0.795736	0.0269375	0.784367	0.0103612	Modellparzelle
1	B			11.5958	50.6278	0.798889	0.0137301	0.79661	0.00780811	Modellparzelle
1	B			11.5959	50.6278	0.823691	0.0195379	0.807124	0.00910485	Modellparzelle
1	B			11.5957	50.6278	0.795691	0.0220918	0.789376	0.0114469	Modellparzelle
1	B			11.5958	50.6278	0.807213	0.010364	0.801098	0.0084051	Modellparzelle
1	B			11.5959	50.6278	0.829224	0.0129315	0.805499	0.00639427	Modellparzelle
1	B			11.5957	50.6278	0.793866	0.019741	0.788551	0.0138501	Modellparzelle
1	B			11.5958	50.6278	0.807836	0.0122642	0.799214	0.00686943	Modellparzelle
1	B			11.5959	50.6278	0.827372	0.00877988	0.80218	0.00555625	Modellparzelle
1	B			11.5957	50.6278	0.784205	0.0243054	0.774191	0.017137	Modellparzelle
1	B			11.5958	50.6278	0.797461	0.0104719	0.796995	0.00687082	Modellparzelle
1	B			11.5959	50.6278	0.829977	0.0119209	0.802127	0.00770592	Modellparzelle
1	B			11.5957	50.6279	0.793152	0.0229348	0.780613	0.0138356	Modellparzelle
1	B			11.5958	50.6278	0.794144	0.0173269	0.792968	0.00802211	Modellparzelle
1	B			11.5959	50.6278	0.832916	0.0115408	0.802029	0.00650232	Modellparzelle
1	B			11.5957	50.6279	0.797482	0.0196348	0.7877	0.0118976	Modellparzelle
1	B			11.5958	50.6279	0.797123	0.0221892	0.796173	0.0111458	Modellparzelle
1	B			11.5959	50.6278	0.836949	0.00977242	0.805698	0.00630437	Modellparzelle
1	B			11.5957	50.6279	0.797247	0.0178715	0.784689	0.0116434	Modellparzelle
1	B			11.5958	50.6279	0.801053	0.0203836	0.799954	0.00901649	Modellparzelle
1	B			11.5959	50.6279	0.837199	0.00696875	0.812572	0.00517646	Modellparzelle
1	B			11.5957	50.6279	0.792213	0.0198779	0.778873	0.00985138	Modellparzelle
1	B			11.5958	50.6279	0.804559	0.0187869	0.801771	0.00955565	Modellparzelle
1	B			11.5959	50.6279	0.831399	0.00810742	0.807328	0.00728189	Modellparzelle
1	B			11.5957	50.6279	0.791699	0.0165445	0.781001	0.00889795	Modellparzelle
1	B			11.5958	50.6279	0.813295	0.0147015	0.805675	0.00562739	Modellparzelle
1	B			11.5959	50.6279	0.823978	0.00943793	0.799276	0.00619415	Modellparzelle
1	B			11.5957	50.6279	0.795301	0.0161079	0.787113	0.0108846	Modellparzelle
1	B			11.5958	50.6279	0.814741	0.0145405	0.805173	0.00627213	Modellparzelle
1	B			11.5959	50.6279	0.824542	0.0104772	0.800773	0.00633345	Modellparzelle
1	B			11.5957	50.6279	0.803547	0.0122048	0.791741	0.00866825	Modellparzelle
1	B			11.5958	50.6279	0.807233	0.0177043	0.798294	0.00961289	Modellparzelle
1	B			11.5959	50.6279	0.825803	0.00906027	0.801924	0.00745835	Modellparzelle
1	B			11.5957	50.6279	0.802802	0.00942868	0.787687	0.00945973	Modellparzelle
1	B			11.5958	50.6279	0.801774	0.0178915	0.794074	0.0122011	Modellparzelle
1	B			11.596	50.6279	0.835459	0.00848907	0.810138	0.00736343	Modellparzelle
1	B			11.5957	50.628	0.806987	0.0138822	0.783723	0.0115651	Modellparzelle
1	B			11.5959	50.6279	0.793717	0.0204176	0.786751	0.0130497	Modellparzelle
1	B			11.596	50.6279	0.842704	0.00642759	0.816317	0.00449162	Modellparzelle
1	B			11.5958	50.628	0.80421	0.0176354	0.774185	0.0178649	Modellparzelle
1	B			11.5959	50.628	0.797609	0.0260535	0.790988	0.0181134	Modellparzelle
1	B			11.596	50.628	0.838725	0.00794643	0.814347	0.0042361	Modellparzelle
1	B			11.5958	50.628	0.808965	0.0192645	0.776623	0.0140874	Modellparzelle
1	B			11.5959	50.628	0.797265	0.033679	0.793632	0.0231671	Modellparzelle
1	B			11.596	50.628	0.830294	0.00995641	0.807558	0.00669857	Modellparzelle
1	B			11.5958	50.628	0.810659	0.0139908	0.77882	0.00920778	Modellparzelle
1	B			11.5959	50.628	0.797738	0.0287985	0.788179	0.0153421	Modellparzelle
1	B			11.596	50.628	0.818838	0.0140077	0.794278	0.00806125	Modellparzelle
1	B			11.5958	50.628	0.811235	0.0186388	0.779963	0.0122336	Modellparzelle
1	B			11.5959	50.628	0.797157	0.025588	0.786152	0.0138576	Modellparzelle
1	B			11.596	50.628	0.818271	0.0132227	0.793361	0.0101879	Modellparzelle
1	B			11.5958	50.628	0.809895	0.0261944	0.776632	0.0174077	Modellparzelle
1	B			11.5959	50.628	0.784091	0.0290534	0.779832	0.015315	Modellparzelle
1	B			11.596	50.628	0.820721	0.0126657	0.79755	0.012312	Modellparzelle
1	B			11.5958	50.628	0.807878	0.0237286	0.774521	0.0182993	Modellparzelle
1	B			11.5959	50.628	0.784696	0.0278528	0.783391	0.0180584	Modellparzelle
1	B			11.596	50.628	0.828989	0.010296	0.803107	0.00948777	Modellparzelle
1	B			11.5958	50.628	0.808237	0.0162148	0.779801	0.00976621	Modellparzelle
1	B			11.5959	50.628	0.782427	0.0284905	0.787631	0.0169023	Modellparzelle
1	B			11.596	50.628	0.836411	0.00701391	0.809907	0.00596272	Modellparzelle
1	B			11.5958	50.6281	0.817004	0.0243406	0.791709	0.0142905	Modellparzelle
1	B			11.5959	50.6281	0.777463	0.0313607	0.788527	0.0183485	Modellparzelle
1	B			11.596	50.628	0.839433	0.00862529	0.814498	0.00691498	Modellparzelle
1	B			11.5958	50.6281	0.817735	0.0288164	0.79259	0.0176891	Modellparzelle
1	B			11.5959	50.6281	0.76787	0.0391358	0.781079	0.0235481	Modellparzelle
1	B			11.596	50.6281	0.837178	0.0087548	0.815592	0.00566734	Modellparzelle
1	B			11.5958	50.6281	0.812919	0.0258723	0.787693	0.0147868	Modellparzelle
1	B			11.5959	50.6281	0.778712	0.0358088	0.790079	0.0196073	Modellparzelle
1	B			11.596	50.6281	0.834073	0.0108351	0.812439	0.0059463	Modellparzelle
1	B			11.5958	50.6281	0.809483	0.0185223	0.790023	0.00976096	Modellparzelle
1	B			11.5959	50.6281	0.798477	0.0272222	0.801638	0.0111243	Modellparzelle
1	B			11.596	50.6281	0.837282	0.00997123	0.815682	0.00536232	Modellparzelle
1	B			11.5958	50.6281	0.80261	0.0227542	0.793913	0.00781984	Modellparzelle
1	B			11.5959	50.6281	0.801729	0.0254717	0.803487	0.009141	Modellparzelle
1	B			11.596	50.6281	0.835557	0.00977211	0.815751	0.00654231	Modellparzelle
1	B			11.5958	50.6281	0.800893	0.0262432	0.795629	0.00918709	Modellparzelle
1	B			11.5959	50.6281	0.800779	0.0277182	0.799832	0.0139008	Modellparzelle
1	B			11.596	50.6281	0.83886	0.0073418	0.81858	0.00663397	Modellparzelle
1	B			11.5958	50.6281	0.803023	0.0299815	0.794774	0.0110655	Modellparzelle
1	B			11.5959	50.6281	0.789935	0.0247008	0.79536	0.0144158	Modellparzelle
1	B			11.596	50.6281	0.84469	0.00688838	0.822935	0.00492603	Modellparzelle
1	B			11.5958	50.6282	0.792658	0.0423158	0.791548	0.013468	Modellparzelle
1	B			11.5959	50.6281	0.788475	0.0307372	0.800631	0.0140367	Modellparzelle
1	B			11.596	50.6281	0.848467	0.00696597	0.826134	0.0042955	Modellparzelle
1	B			11.5958	50.6282	0.793724	0.0542654	0.793495	0.0184435	Modellparzelle
1	B			11.5959	50.6282	0.788074	0.039525	0.804168	0.0149481	Modellparzelle
1	B			11.596	50.6282	0.84549	0.00647717	0.82143	0.00454096	Modellparzelle
1	B			11.5958	50.6282	0.788559	0.0606243	0.791348	0.0243361	Modellparzelle
1	B			11.5959	50.6282	0.785618	0.0416798	0.802486	0.0145038	Modellparzelle
1	B			11.596	50.6282	0.847936	0.00822476	0.818642	0.00515607	Modellparzelle
1	B			11.5958	50.6282	0.783558	0.054665	0.788154	0.0198882	Modellparzelle
1	B			11.5959	50.6282	0.771651	0.0506411	0.794376	0.0161182	Modellparzelle
1	B			11.596	50.6282	0.840278	0.00726183	0.817804	0.00420202	Modellparzelle
1	B			11.5958	50.6282	0.782679	0.052312	0.781863	0.021512	Modellparzelle
1	B			11.5959	50.6282	0.761674	0.0607756	0.787331	0.0220308	Modellparzelle
1	B			11.596	50.6282	0.840287	0.00854585	0.820741	0.00449676	Modellparzelle
1	B			11.5958	50.6282	0.761349	0.0584846	0.766988	0.0247616	Modellparzelle
1	B			11.5959	50.6282	0.750478	0.0629733	0.78165	0.027165	Modellparzelle
1	B			11.596	50.6282	0.836795	0.00894994	0.818383	0.00615281	Modellparzelle
1	B			11.5958	50.6282	0.758428	0.065694	0.764467	0.0265255	Modellparzelle
1	B			11.5959	50.6282	0.75682	0.0564984	0.783063	0.0280543	Modellparzelle
1	B			11.596	50.6282	0.835744	0.00895362	0.817364	0.00370025	Modellparzelle
1	B			11.5958	50.6282	0.757595	0.0677247	0.765966	0.0257617	Modellparzelle
1	B			11.5959	50.6282	0.758694	0.0495008	0.783178	0.0250874	Modellparzelle
1	B			11.596	50.6282	0.841352	0.00714541	0.818803	0.00292139	Modellparzelle
1	B			11.5958	50.6283	0.759024	0.0779262	0.769093	0.0313146	Modellparzelle
1	B			11.5959	50.6283	0.758207	0.0552751	0.78276	0.0236876	Modellparzelle
1	B			11.596	50.6282	0.844896	0.00848133	0.822967	0.00443151	Modellparzelle
1	B			11.5958	50.6283	0.772551	0.070431	0.770704	0.0345855	Modellparzelle
1	B			11.5959	50.6283	0.760043	0.0583649	0.780528	0.0230857	Modellparzelle
1	B			11.596	50.6283	0.848983	0.008523	0.8247	0.00440321	Modellparzelle
1	B			11.5958	50.6283	0.785735	0.0469941	0.773263	0.0293341	Modellparzelle
1	B			11.5959	50.6283	0.758936	0.0539596	0.769357	0.0248165	Modellparzelle
1	B			11.596	50.6283	0.849411	0.00688753	0.823166	0.00381157	Modellparzelle
1	B			11.5958	50.6283	0.799394	0.0223681	0.775367	0.0175826	Modellparzelle
1	B			11.5959	50.6283	0.762392	0.0532779	0.759723	0.0322283	Modellparzelle
1	B			11.596	50.6283	0.851053	0.011773	0.820728	0.00457891	Modellparzelle
1	B			11.5958	50.6283	0.81463	0.0226526	0.778813	0.0214927	Modellparzelle
1	B			11.5959	50.6283	0.768612	0.0445106	0.758757	0.0344511	Modellparzelle
1	B			11.5961	50.6283	0.847265	0.00705964	0.820475	0.00372059	Modellparzelle
1	B			11.5958	50.6283	0.820924	0.0177097	0.782457	0.0172577	Modellparzelle
1	B			11.5959	50.6283	0.789819	0.0367735	0.769307	0.033502	Modellparzelle
1	B			11.5961	50.6283	0.849503	0.00558242	0.818689	0.00600553	Modellparzelle
1	B			11.5958	50.6283	0.822509	0.0123595	0.775325	0.00867902	Modellparzelle
1	B			11.596	50.6283	0.794114	0.0354811	0.769737	0.0296582	Modellparzelle
1	B			11.5961	50.6283	0.853949	0.00540211	0.820189	0.0041151	Modellparzelle
1	B			11.5958	50.6284	0.826654	0.00990833	0.777928	0.00737798	Modellparzelle
1	B			11.596	50.6283	0.790313	0.038261	0.763685	0.0326369	Modellparzelle
1	B			11.5961	50.6283	0.850386	0.00716164	0.815992	0.00682097	Modellparzelle
1	B			11.5959	50.6284	0.828592	0.00980576	0.779619	0.00929249	Modellparzelle
1	B			11.596	50.6284	0.777499	0.0334636	0.747178	0.0279129	Modellparzelle
1	B			11.5961	50.6284	0.847104	0.00867154	0.806171	0.00817598	Modellparzelle
1	B			11.5959	50.6284	0.828446	0.0133888	0.780114	0.0102639	Modellparzelle
1	B			11.596	50.6284	0.746506	0.0509951	0.717717	0.0389336	Modellparzelle
1	B			11.5961	50.6284	0.850186	0.00902275	0.809172	0.0101319	Modellparzelle
1	B			11.5959	50.6284	0.824246	0.0131646	0.770929	0.0156637	Modellparzelle
1	B			11.596	50.6284	0.750325	0.046883	0.721579	0.0327447	Modellparzelle
1	B			11.5961	50.6284	0.852427	0.00973066	0.815211	0.0100077	Modellparzelle
1	B			11.5959	50.6284	0.823705	0.0133889	0.766432	0.0150238	Modellparzelle
1	B			11.596	50.6284	0.767234	0.0338378	0.732044	0.0267116	Modellparzelle
1	B			11.5961	50.6284	0.850532	0.00955203	0.815648	0.00993167	Modellparzelle
1	B			11.5959	50.6284	0.826113	0.0119892	0.768143	0.0114947	Modellparzelle
1	B			11.596	50.6284	0.784389	0.0240157	0.744534	0.0246357	Modellparzelle
1	B			11.5961	50.6284	0.845543	0.0091039	0.809159	0.00978385	Modellparzelle
1	B			11.5959	50.6284	0.829473	0.0130691	0.7751	0.00804768	Modellparzelle
1	B			11.596	50.6284	0.803964	0.0138731	0.763278	0.0128615	Modellparzelle
1	B			11.5961	50.6284	0.849161	0.010019	0.807793	0.00696467	Modellparzelle
1	B			11.5959	50.6285	0.836915	0.0141104	0.782691	0.0116571	Modellparzelle
1	B			11.596	50.6284	0.798365	0.0178103	0.757563	0.0109204	Modellparzelle
1	B			11.5961	50.6284	0.855174	0.0122807	0.812277	0.00988427	Modellparzelle
1	B			11.5959	50.6285	0.841548	0.0136632	0.788388	0.0121652	Modellparzelle
1	B			11.596	50.6285	0.789227	0.0291798	0.749013	0.0177069	Modellparzelle
1	B			11.5961	50.6284	0.859988	0.00871065	0.815274	0.0105293	Modellparzelle
1	B			11.5959	50.6285	0.835283	0.0244145	0.783223	0.0228448	Modellparzelle
1	B			11.596	50.6285	0.778045	0.0411244	0.738185	0.0315793	Modellparzelle
1	B			11.5961	50.6285	0.862948	0.00629171	0.816945	0.00675332	Modellparzelle
1	B			11.5959	50.6285	0.819595	0.0321104	0.769426	0.0270233	Modellparzelle
1	B			11.596	50.6285	0.787909	0.0440422	0.751158	0.0377669	Modellparzelle
1	B			11.5961	50.6285	0.864455	0.00487486	0.816691	0.00578679	Modellparzelle
1	B			11.5959	50.6285	0.797788	0.0372911	0.750243	0.022428	Modellparzelle
1	B			11.596	50.6285	0.801427	0.0356486	0.766421	0.0285383	Modellparzelle
1	B			11.5961	50.6285	0.862648	0.00578151	0.811535	0.00539219	Modellparzelle
1	B			11.5959	50.6285	0.77819	0.0465188	0.730878	0.0247439	Modellparzelle
1	B			11.596	50.6285	0.796664	0.0356251	0.755339	0.0274194	Modellparzelle
1	B			11.5961	50.6285	0.857923	0.00644936	0.806357	0.00567584	Modellparzelle
1	B			11.5959	50.6285	0.789385	0.0428987	0.735177	0.0243327	Modellparzelle
1	B			11.596	50.6285	0.786072	0.0458388	0.741983	0.0339405	Modellparzelle
1	B			11.5961	50.6285	0.851078	0.00794018	0.802975	0.00588766	Modellparzelle
1	B			11.5959	50.6285	0.802969	0.0471113	0.74811	0.0269154	Modellparzelle
1	B			11.596	50.6285	0.784658	0.0432752	0.741188	0.0360135	Modellparzelle
1	B			11.5961	50.6285	0.846234	0.00888415	0.79859	0.00636709	Modellparzelle
1	B			11.5959	50.6286	0.80942	0.0413827	0.759387	0.0221052	Modellparzelle
1	B			11.596	50.6285	0.79002	0.0324022	0.748145	0.0237436	Modellparzelle
1	B			11.5961	50.6285	0.838237	0.0118994	0.788143	0.00775289	Modellparzelle
1	B			11.5959	50.6286	0.802248	0.0489501	0.758667	0.0227812	Modellparzelle
1	B			11.596	50.6286	0.785754	0.0360197	0.742797	0.0271739	Modellparzelle
1	B			11.5961	50.6286	0.835575	0.0118243	0.784218	0.00782773	Modellparzelle
1	B			11.5959	50.6286	0.804185	0.0367964	0.758936	0.0191719	Modellparzelle
1	B			11.596	50.6286	0.786439	0.0277381	0.74257	0.0218213	Modellparzelle
1	B			11.5961	50.6286	0.838237	0.0151686	0.786958	0.00756866	Modellparzelle
1	B			11.5959	50.6286	0.797078	0.0411011	0.755847	0.0198546	Modellparzelle
1	B			11.596	50.6286	0.783264	0.0270527	0.750425	0.0161781	Modellparzelle
1	B			11.5961	50.6286	0.835999	0.0250065	0.78929	0.0122346	Modellparzelle
1	B			11.5959	50.6286	0.774633	0.0485972	0.740606	0.0266548	Modellparzelle
1	B			11.596	50.6286	0.796728	0.0213392	0.764628	0.0136923	Modellparzelle
1	B			11.5961	50.6286	0.835032	0.0282074	0.794788	0.0123829	Modellparzelle
1	B			11.5959	50.6286	0.739137	0.0631913	0.717995	0.0315344	Modellparzelle
1	B			11.596	50.6286	0.802939	0.0190449	0.766147	0.0130429	Modellparzelle
1	B			11.5961	50.6286	0.835822	0.020103	0.796989	0.0105064	Modellparzelle
1	B			11.5959	50.6286	0.712322	0.0672705	0.701836	0.0396159	Modellparzelle
1	B			11.596	50.6286	0.805336	0.0188461	0.769221	0.0149659	Modellparzelle
1	B			11.5961	50.6286	0.834842	0.0158118	0.792629	0.011308	Modellparzelle
1	B			11.5959	50.6287	0.705263	0.0656844	0.684985	0.0464766	Modellparzelle
1	B			11.596	50.6286	0.808165	0.0164631	0.773057	0.012055	Modellparzelle
1	B			11.5961	50.6286	0.833839	0.0210733	0.793675	0.0145171	Modellparzelle
1	B			11.5959	50.6287	0.723404	0.0548207	0.682344	0.0430273	Modellparzelle
1	B			11.596	50.6287	0.798226	0.0227387	0.759159	0.0182281	Modellparzelle
1	B			11.5961	50.6286	0.830639	0.0235104	0.786948	0.0193667	Modellparzelle
1	B			11.5959	50.6287	0.733287	0.0468125	0.685157	0.0388777	Modellparzelle
1	B			11.596	50.6287	0.787423	0.0284592	0.741982	0.0282311	Modellparzelle
1	B			11.5961	50.6287	0.83701	0.0159429	0.793656	0.0144905	Modellparzelle
1	B			11.5959	50.6287	0.718479	0.0380515	0.671098	0.0260277	Modellparzelle
1	B			11.596	50.6287	0.769474	0.0404792	0.727438	0.0343304	Modellparzelle
1	B			11.5961	50.6287	0.821368	0.0210503	0.779502	0.0163186	Modellparzelle
1	B			11.5959	50.6287	0.697956	0.053887	0.655543	0.0391168	Modellparzelle
1	B			11.596	50.6287	0.758536	0.0467099	0.721925	0.0381999	Modellparzelle
1	B			11.5961	50.6287	0.804797	0.0235212	0.76522	0.0229811	Modellparzelle
1	B			11.5959	50.6287	0.674506	0.065956	0.639255	0.0479236	Modellparzelle
1	B			11.596	50.6287	0.740725	0.051016	0.707129	0.0359414	Modellparzelle
1	B			11.5961	50.6287	0.807237	0.0278191	0.768646	0.0285846	Modellparzelle
1	B			11.5959	50.6287	0.667592	0.0584438	0.637213	0.0356965	Modellparzelle
1	B			11.596	50.6287	0.732879	0.0565509	0.696173	0.0461101	Modellparzelle
1	B			11.5961	50.6287	0.80305	0.0232038	0.764016	0.0222265	Modellparzelle
1	B			11.5959	50.6287	0.649977	0.053577	0.627264	0.021045	Modellparzelle
1	B			11.596	50.6287	0.737235	0.0593943	0.697738	0.0502156	Modellparzelle
1	B			11.5961	50.6287	0.802159	0.0181045	0.759612	0.013035	Modellparzelle
1	B			11.5959	50.6288	0.646733	0.059492	0.626893	0.030955	Modellparzelle
1	B			11.596	50.6288	0.729049	0.0548266	0.691005	0.0472582	Modellparzelle
1	B			11.5961	50.6287	0.781357	0.0379018	0.743106	0.0301958	Modellparzelle
1	B			11.5959	50.6288	0.619657	0.0825259	0.600703	0.0489644	Modellparzelle
1	B			11.596	50.6288	0.707754	0.0546785	0.676663	0.0412985	Modellparzelle
1	B			11.5961	50.6288	0.774067	0.0489133	0.739861	0.0423467	Modellparzelle
1	B			11.5959	50.6288	0.571519	0.0848448	0.574093	0.0474363	Modellparzelle
1	B			11.596	50.6288	0.661551	0.0614665	0.648816	0.0353321	Modellparzelle
1	B			11.5961	50.6288	0.7748	0.0516465	0.741497	0.0452471	Modellparzelle
1	B			11.5959	50.6288	0.562919	0.0705784	0.56293	0.0370905	Modellparzelle
1	B			11.596	50.6288	0.644449	0.0739339	0.634369	0.0432478	Modellparzelle
1	B			11.5961	50.6288	0.773441	0.0366916	0.746193	0.0324191	Modellparzelle
1	B			11.5959	50.6288	0.543473	0.052439	0.545787	0.023732	Modellparzelle
1	B			11.596	50.6288	0.631721	0.0984549	0.634978	0.0600013	Modellparzelle
1	B			11.5961	50.6288	0.767371	0.0280936	0.742266	0.0198427	Modellparzelle
1	B			11.5959	50.6288	0.53762	0.0562069	0.532992	0.027633	Modellparzelle
1	B			11.596	50.6288	0.614675	0.09885	0.629556	0.0621986	Modellparzelle
1	B			11.5961	50.6288	0.758208	0.026349	0.72864	0.0273683	Modellparzelle
1	B			11.5959	50.6288	0.506514	0.062717	0.523432	0.0412143	Modellparzelle
1	B			11.596	50.6288	0.579187	0.106781	0.617629	0.0638523	Modellparzelle
1	B			11.5961	50.6288	0.762175	0.028411	0.727905	0.0318677	Modellparzelle
1	B			11.5959	50.6289	0.507643	0.074407	0.5307	0.0397087	Modellparzelle
1	B			11.596	50.6288	0.561088	0.117522	0.60275	0.0786146	Modellparzelle
1	B			11.5961	50.6288	0.766759	0.0315673	0.728767	0.0348066	Modellparzelle
1	B			11.5959	50.6289	0.526919	0.0799485	0.533914	0.0427587	Modellparzelle
1	B			11.596	50.6289	0.547739	0.115983	0.594867	0.0799874	Modellparzelle
1	B			11.5961	50.6289	0.770984	0.0251138	0.730924	0.0277715	Modellparzelle
1	B			11.5959	50.6289	0.531125	0.0727305	0.536257	0.0407459	Modellparzelle
1	B			11.596	50.6289	0.57061	0.117457	0.610112	0.0733181	Modellparzelle
1	B			11.5961	50.6289	0.778982	0.0237879	0.73943	0.0237084	Modellparzelle
1	B			11.5959	50.6289	0.557689	0.0717386	0.553217	0.0455702	Modellparzelle
1	B			11.596	50.6289	0.589736	0.120774	0.624104	0.077459	Modellparzelle
1	B			11.5961	50.6289	0.791579	0.0217164	0.748743	0.0249846	Modellparzelle
1	B			11.5959	50.6289	0.602426	0.0878567	0.586656	0.05733	Modellparzelle
1	B			11.596	50.6289	0.641157	0.101616	0.656652	0.0602295	Modellparzelle
1	B			11.5961	50.6289	0.796279	0.0174771	0.753321	0.0176816	Modellparzelle
1	B			11.5959	50.6289	0.664043	0.0865077	0.622794	0.0609113	Modellparzelle
1	B			11.596	50.6289	0.690583	0.0993751	0.686228	0.0580516	Modellparzelle
1	B			11.5961	50.6289	0.810601	0.0194813	0.765381	0.0173628	Modellparzelle
1	B			11.5959	50.6289	0.731906	0.0781173	0.67723	0.0609886	Modellparzelle
1	B			11.596	50.6289	0.749983	0.0669741	0.714248	0.0423401	Modellparzelle
1	B			11.5961	50.6289	0.833912	0.0136776	0.777528	0.0107212	Modellparzelle
1	B			11.5959	50.629	0.77465	0.0603984	0.715511	0.0430794	Modellparzelle
1	B			11.596	50.6289	0.789242	0.0433926	0.736394	0.0303325	Modellparzelle
1	B			11.5961	50.6289	0.852628	0.00832518	0.795243	0.00964106	Modellparzelle
1	B			11.5959	50.629	0.807098	0.0412769	0.743044	0.0276123	Modellparzelle
1	B			11.596	50.629	0.79981	0.0441734	0.746771	0.0276663	Modellparzelle
1	B			11.5961	50.6289	0.861303	0.00882581	0.803172	0.00875097	Modellparzelle
1	B			11.5959	50.629	0.822833	0.0353019	0.753894	0.0231254	Modellparzelle
1	B			11.596	50.629	0.82905	0.022536	0.77436	0.0129634	Modellparzelle
1	B			11.5961	50.629	0.869178	0.00707525	0.810367	0.00706243	Modellparzelle
1	B			11.5959	50.629	0.82915	0.0320817	0.760906	0.0237103	Modellparzelle
1	B			11.596	50.629	0.842552	0.0178073	0.789338	0.0148571	Modellparzelle
1	B			11.5961	50.629	0.871651	0.00611507	0.817485	0.00530546	Modellparzelle
1	B			11.5959	50.629	0.830508	0.032868	0.759299	0.0241981	Modellparzelle
1	B			11.596	50.629	0.849714	0.0130224	0.794786	0.0116746	Modellparzelle
1	B			11.5961	50.629	0.864669	0.0091252	0.81382	0.00611502	Modellparzelle
1	B			11.5959	50.629	0.838009	0.027037	0.760284	0.0207847	Modellparzelle
1	B			11.596	50.629	0.851561	0.00871938	0.795287	0.00979146	Modellparzelle
1	B			11.5961	50.629	0.860293	0.0103008	0.807291	0.00840266	Modellparzelle
1	B			11.5959	50.629	0.847039	0.0193401	0.768658	0.0157889	Modellparzelle
1	B			11.596	50.629	0.845338	0.0104695	0.787388	0.0141109	Modellparzelle
1	B			11.5961	50.629	0.860443	0.00909958	0.808123	0.00698422	Modellparzelle
1	B			11.5959	50.629	0.849523	0.0168822	0.773215	0.0154966	Modellparzelle
1	B			11.596	50.629	0.83568	0.0136916	0.776443	0.0137913	Modellparzelle
1	B			11.5961	50.629	0.863843	0.00738482	0.811824	0.00629851	Modellparzelle
1	B			11.5959	50.6291	0.853294	0.0114864	0.777483	0.0107267	Modellparzelle
1	B			11.596	50.6291	0.839608	0.0156768	0.778753	0.0128973	Modellparzelle
1	B			11.5961	50.629	0.867882	0.00701083	0.814924	0.00734406	Modellparzelle
1	B			11.5959	50.6291	0.850463	0.0137888	0.769195	0.0200257	Modellparzelle
1	B			11.596	50.6291	0.839298	0.0168037	0.786161	0.0123934	Modellparzelle
1	B			11.5961	50.6291	0.869951	0.00663231	0.816555	0.00775494	Modellparzelle
1	B			11.5959	50.6291	0.842696	0.018149	0.758937	0.0249039	Modellparzelle
1	B			11.596	50.6291	0.83031	0.0204836	0.785144	0.00943018	Modellparzelle
1	B			11.5961	50.6291	0.874937	0.00695925	0.820078	0.00703796	Modellparzelle
1	B			11.5959	50.6291	0.842573	0.0137972	0.763582	0.018859	Modellparzelle
1	B			11.596	50.6291	0.828272	0.0215908	0.787499	0.0103042	Modellparzelle
1	B			11.5961	50.6291	0.875724	0.00682607	0.823276	0.00651554	Modellparzelle
1	B			11.5959	50.6291	0.838539	0.0151733	0.763694	0.0142637	Modellparzelle
1	B			11.596	50.6291	0.831545	0.0178041	0.789252	0.00995743	Modellparzelle
1	B			11.5961	50.6291	0.878056	0.00767103	0.827178	0.0070145	Modellparzelle
1	B			11.5959	50.6291	0.837014	0.0146684	0.763271	0.0140381	Modellparzelle
1	B			11.596	50.6291	0.833982	0.0141206	0.785998	0.00964534	Modellparzelle
1	B			11.5961	50.6291	0.880022	0.00791701	0.829864	0.00768987	Modellparzelle
1	B			11.5959	50.6291	0.83139	0.0203893	0.755614	0.0229685	Modellparzelle
1	B			11.596	50.6291	0.828844	0.0154802	0.776951	0.00935373	Modellparzelle
1	B			11.5961	50.6291	0.876467	0.00708659	0.825115	0.00900105	Modellparzelle
1	B			11.5959	50.6292	0.817561	0.0254423	0.739976	0.0269746	Modellparzelle
1	B			11.596	50.6291	0.825793	0.013953	0.774823	0.00834462	Modellparzelle
1	B			11.5961	50.6291	0.873374	0.00919799	0.821839	0.0108562	Modellparzelle
1	B			11.5959	50.6292	0.80772	0.0324659	0.736127	0.0282985	Modellparzelle
1	B			11.596	50.6292	0.823389	0.0138933	0.773443	0.0102157	Modellparzelle
1	B			11.5961	50.6292	0.860393	0.0327663	0.817146	0.0104836	Modellparzelle
1	B			11.5959	50.6292	0.807795	0.0264911	0.738276	0.0238018	Modellparzelle
1	B			11.596	50.6292	0.821904	0.0144322	0.772714	0.00970584	Modellparzelle
1	B			11.5961	50.6292	0.854125	0.0530454	0.815609	0.0108108	Modellparzelle
5	A			11.5952	50.6279	0.855264	0.0295391	0.816315	0.017116	Modellparzelle
5	A			11.5951	50.6279	0.82952	0.0232923	0.784136	0.0100955	Modellparzelle
5	A			11.595	50.6279	0.858627	0.0100333	0.804508	0.00829993	Modellparzelle
5	A			11.5952	50.6279	0.857361	0.0247461	0.812918	0.0142904	Modellparzelle
5	A			11.5951	50.6279	0.830144	0.021064	0.783579	0.0106951	Modellparzelle
5	A			11.595	50.6279	0.860312	0.00705896	0.806845	0.00573415	Modellparzelle
5	A			11.5952	50.6279	0.860843	0.0177506	0.813746	0.012001	Modellparzelle
5	A			11.5951	50.6279	0.836215	0.0126112	0.792562	0.00696261	Modellparzelle
5	A			11.5949	50.6279	0.859015	0.00680473	0.808581	0.00711506	Modellparzelle
5	A			11.5952	50.6279	0.861107	0.0139353	0.811417	0.00933479	Modellparzelle
5	A			11.5951	50.6279	0.834733	0.0117009	0.788404	0.00652898	Modellparzelle
5	A			11.5949	50.6279	0.858388	0.00667182	0.811617	0.00593403	Modellparzelle
5	A			11.5952	50.6279	0.863858	0.00978042	0.814154	0.00644279	Modellparzelle
5	A			11.595	50.6279	0.828431	0.0145924	0.782698	0.0155177	Modellparzelle
5	A			11.5949	50.6279	0.857483	0.00806617	0.814278	0.00649804	Modellparzelle
5	A			11.5952	50.6278	0.865962	0.012672	0.815447	0.00914594	Modellparzelle
5	A			11.595	50.6279	0.836804	0.0155966	0.79781	0.0157009	Modellparzelle
5	A			11.5949	50.6279	0.856644	0.00598482	0.812138	0.0058487	Modellparzelle
5	A			11.5951	50.6278	0.866446	0.0117678	0.81706	0.00924469	Modellparzelle
5	A			11.595	50.6278	0.838166	0.0111087	0.801321	0.00914444	Modellparzelle
5	A			11.5949	50.6279	0.856955	0.00586041	0.810615	0.00570595	Modellparzelle
5	A			11.5951	50.6278	0.865488	0.0100717	0.817286	0.0057577	Modellparzelle
5	A			11.595	50.6278	0.84138	0.0127442	0.800067	0.0110395	Modellparzelle
5	A			11.5949	50.6278	0.859808	0.00628912	0.813125	0.00623626	Modellparzelle
5	A			11.5951	50.6278	0.860849	0.00950044	0.815066	0.00883344	Modellparzelle
5	A			11.595	50.6278	0.844596	0.0142536	0.803145	0.0117123	Modellparzelle
5	A			11.5949	50.6278	0.859984	0.00728462	0.815463	0.00685841	Modellparzelle
5	A			11.5951	50.6278	0.872487	0.00956169	0.832409	0.00776702	Modellparzelle
5	A			11.595	50.6278	0.846556	0.0136672	0.811922	0.00953832	Modellparzelle
5	A			11.5949	50.6278	0.860808	0.00596648	0.819381	0.00701937	Modellparzelle
5	A			11.5951	50.6278	0.880767	0.00546698	0.842171	0.0042673	Modellparzelle
5	A			11.595	50.6278	0.846099	0.0108481	0.809643	0.01097	Modellparzelle
5	A			11.5949	50.6278	0.855778	0.00866683	0.82114	0.00656374	Modellparzelle
5	A			11.5951	50.6278	0.872072	0.0159368	0.835604	0.00870099	Modellparzelle
5	A			11.595	50.6278	0.841498	0.0110402	0.808896	0.00760636	Modellparzelle
5	A			11.5949	50.6278	0.84635	0.0124529	0.815318	0.00740864	Modellparzelle
5	A			11.5951	50.6278	0.86236	0.0126346	0.824181	0.006749	Modellparzelle
5	A			11.595	50.6278	0.842264	0.0107142	0.810395	0.0053554	Modellparzelle
5	A			11.5949	50.6278	0.83956	0.0137292	0.806111	0.00861847	Modellparzelle
5	A			11.595	50.6279	0.86257	0.00851386	0.81019	0.00742985	Modellparzelle
5	A			11.5951	50.6279	0.831077	0.0270684	0.785646	0.0135766	Modellparzelle
5	A			11.5952	50.6279	0.855076	0.0329255	0.815549	0.0195461	Modellparzelle
5	A			11.595	50.628	0.863807	0.00908407	0.81313	0.00556411	Modellparzelle
5	A			11.5951	50.6279	0.836277	0.0265615	0.790896	0.0129775	Modellparzelle
5	A			11.5952	50.6279	0.855166	0.0349754	0.814741	0.0204713	Modellparzelle
5	A			11.595	50.628	0.859762	0.00953977	0.80538	0.00663795	Modellparzelle
5	A			11.5951	50.628	0.838715	0.0260273	0.794512	0.0129488	Modellparzelle
5	A			11.5952	50.628	0.857139	0.0284894	0.814874	0.0175932	Modellparzelle
5	A			11.595	50.628	0.859738	0.0092938	0.806403	0.00574063	Modellparzelle
5	A			11.5951	50.628	0.844118	0.0225114	0.796471	0.00932279	Modellparzelle
5	A			11.5952	50.628	0.858183	0.0233528	0.814399	0.0134529	Modellparzelle
5	A			11.595	50.628	0.856927	0.0071969	0.802806	0.00749759	Modellparzelle
5	A			11.5951	50.628	0.841926	0.0218514	0.794627	0.00824317	Modellparzelle
5	A			11.5952	50.628	0.861807	0.0250033	0.8176	0.0145838	Modellparzelle
5	A			11.595	50.628	0.853805	0.00674216	0.798063	0.00566382	Modellparzelle
5	A			11.5951	50.628	0.845441	0.0171848	0.797038	0.00655041	Modellparzelle
5	A			11.5952	50.628	0.86206	0.0263029	0.818279	0.0149741	Modellparzelle
5	A			11.595	50.628	0.859665	0.0064528	0.802688	0.00569078	Modellparzelle
5	A			11.5951	50.628	0.850719	0.0172201	0.803158	0.0085691	Modellparzelle
5	A			11.5952	50.628	0.86493	0.0258564	0.822059	0.0134558	Modellparzelle
5	A			11.595	50.628	0.85955	0.0064342	0.799619	0.00664686	Modellparzelle
5	A			11.5951	50.628	0.852189	0.0208532	0.803775	0.00844702	Modellparzelle
5	A			11.5952	50.628	0.862357	0.025018	0.819851	0.0124458	Modellparzelle
5	A			11.595	50.628	0.854931	0.00909212	0.788675	0.00872051	Modellparzelle
5	A			11.5951	50.628	0.855092	0.0184017	0.804472	0.00922074	Modellparzelle
5	A			11.5952	50.628	0.865298	0.0181695	0.816033	0.00940198	Modellparzelle
5	A			11.595	50.6281	0.855641	0.00815042	0.790151	0.0075992	Modellparzelle
5	A			11.5951	50.6281	0.857656	0.0224269	0.806252	0.0130918	Modellparzelle
5	A			11.5952	50.628	0.872871	0.0124488	0.819197	0.00798561	Modellparzelle
5	A			11.595	50.6281	0.856215	0.00802824	0.793942	0.00803748	Modellparzelle
5	A			11.5951	50.6281	0.862171	0.0126129	0.808624	0.00995375	Modellparzelle
5	A			11.5952	50.6281	0.875475	0.0128488	0.823292	0.00801067	Modellparzelle
5	A			11.595	50.6281	0.859459	0.0115125	0.797266	0.0093794	Modellparzelle
5	A			11.5951	50.6281	0.863565	0.0104687	0.808537	0.0064626	Modellparzelle
5	A			11.5952	50.6281	0.877835	0.0105408	0.825789	0.00602873	Modellparzelle
5	A			11.595	50.6281	0.867565	0.0100523	0.804548	0.00698338	Modellparzelle
5	A			11.5951	50.6281	0.862098	0.00892703	0.807501	0.00447935	Modellparzelle
5	A			11.5952	50.6281	0.877059	0.0103218	0.822045	0.0064493	Modellparzelle
5	A			11.595	50.6281	0.870304	0.00825393	0.805531	0.00638319	Modellparzelle
5	A			11.5951	50.6281	0.859276	0.0118164	0.80153	0.00513736	Modellparzelle
5	A			11.5952	50.6281	0.878758	0.010997	0.82469	0.00627096	Modellparzelle
5	A			11.595	50.6281	0.869848	0.00801825	0.803641	0.00585319	Modellparzelle
5	A			11.5951	50.6281	0.857615	0.015606	0.797764	0.00534658	Modellparzelle
5	A			11.5952	50.6281	0.877288	0.0116405	0.825881	0.00822595	Modellparzelle
5	A			11.595	50.6281	0.87437	0.00659867	0.805308	0.0100281	Modellparzelle
5	A			11.5951	50.6281	0.863937	0.014994	0.802491	0.00559541	Modellparzelle
5	A			11.5952	50.6281	0.875169	0.0119476	0.82434	0.00854514	Modellparzelle
5	A			11.595	50.6282	0.871768	0.00745983	0.804974	0.0089388	Modellparzelle
5	A			11.5951	50.6281	0.865972	0.0109919	0.803498	0.00487988	Modellparzelle
5	A			11.5952	50.6281	0.875968	0.0118688	0.824836	0.00647692	Modellparzelle
5	A			11.595	50.6282	0.868396	0.00744689	0.800694	0.00884256	Modellparzelle
5	A			11.5951	50.6282	0.865172	0.013589	0.806565	0.00489576	Modellparzelle
5	A			11.5952	50.6282	0.878077	0.0101346	0.824537	0.00462891	Modellparzelle
5	A			11.595	50.6282	0.869268	0.0067677	0.797229	0.00827983	Modellparzelle
5	A			11.5951	50.6282	0.86615	0.0119247	0.809008	0.00505691	Modellparzelle
5	A			11.5953	50.6282	0.88111	0.00755839	0.821757	0.00488412	Modellparzelle
5	A			11.595	50.6282	0.874224	0.00770234	0.804656	0.00884348	Modellparzelle
5	A			11.5951	50.6282	0.870908	0.0120983	0.808973	0.00848182	Modellparzelle
5	A			11.5953	50.6282	0.87758	0.0117144	0.81925	0.00365571	Modellparzelle
5	A			11.595	50.6282	0.876773	0.00623894	0.805785	0.00684312	Modellparzelle
5	A			11.5952	50.6282	0.869291	0.0113618	0.803581	0.00693928	Modellparzelle
5	A			11.5953	50.6282	0.880305	0.00640523	0.816357	0.00398652	Modellparzelle
5	A			11.5951	50.6282	0.876053	0.00714999	0.80205	0.00897807	Modellparzelle
5	A			11.5952	50.6282	0.860007	0.010173	0.790461	0.00748551	Modellparzelle
5	A			11.5953	50.6282	0.884022	0.00658175	0.818531	0.0068182	Modellparzelle
5	A			11.5951	50.6282	0.876287	0.0105916	0.799899	0.01133	Modellparzelle
5	A			11.5952	50.6282	0.857578	0.00653989	0.784364	0.00844763	Modellparzelle
5	A			11.5953	50.6282	0.889579	0.0077805	0.825528	0.00725805	Modellparzelle
5	A			11.5951	50.6282	0.870585	0.00744502	0.794625	0.00698197	Modellparzelle
5	A			11.5952	50.6282	0.856705	0.00698045	0.786416	0.0118023	Modellparzelle
5	A			11.5953	50.6282	0.884783	0.0111051	0.825897	0.00668083	Modellparzelle
5	A			11.5951	50.6283	0.865067	0.00669414	0.792172	0.0057347	Modellparzelle
5	A			11.5952	50.6283	0.853996	0.00838736	0.783889	0.0115932	Modellparzelle
5	A			11.5953	50.6282	0.882773	0.0114618	0.824484	0.00586229	Modellparzelle
5	A			11.5951	50.6283	0.865232	0.00653661	0.792982	0.007869	Modellparzelle
5	A			11.5952	50.6283	0.862958	0.00784431	0.79599	0.00721093	Modellparzelle
5	A			11.5953	50.6283	0.882783	0.00942666	0.820586	0.00475252	Modellparzelle
5	A			11.5951	50.6283	0.868224	0.00585595	0.796752	0.0080124	Modellparzelle
5	A			11.5952	50.6283	0.863446	0.0097462	0.797202	0.00537992	Modellparzelle
5	A			11.5953	50.6283	0.883305	0.00946423	0.820196	0.00772994	Modellparzelle
5	A			11.5951	50.6283	0.869715	0.00684331	0.797599	0.004892	Modellparzelle
5	A			11.5952	50.6283	0.863424	0.0135172	0.795828	0.00710887	Modellparzelle
5	A			11.5953	50.6283	0.883839	0.0109242	0.818803	0.0105012	Modellparzelle
5	A			11.5951	50.6283	0.873413	0.00522738	0.800438	0.00680268	Modellparzelle
5	A			11.5952	50.6283	0.867196	0.0077638	0.799526	0.00569769	Modellparzelle
5	A			11.5953	50.6283	0.885487	0.0119509	0.823342	0.0102103	Modellparzelle
5	A			11.5951	50.6283	0.870867	0.00701966	0.798527	0.00924572	Modellparzelle
5	A			11.5952	50.6283	0.863985	0.0103607	0.797531	0.00626927	Modellparzelle
5	A			11.5953	50.6283	0.881972	0.0109506	0.822343	0.00838542	Modellparzelle
5	A			11.5951	50.6283	0.864831	0.0103725	0.794131	0.0146887	Modellparzelle
5	A			11.5952	50.6283	0.858977	0.013566	0.797178	0.00548844	Modellparzelle
5	A			11.5953	50.6283	0.878	0.0104288	0.819449	0.00620253	Modellparzelle
5	A			11.5951	50.6284	0.865445	0.00842664	0.796068	0.012356	Modellparzelle
5	A			11.5952	50.6283	0.858848	0.0168479	0.79963	0.0058745	Modellparzelle
5	A			11.5953	50.6283	0.875471	0.010098	0.814495	0.00521968	Modellparzelle
5	A			11.5951	50.6284	0.870906	0.00802147	0.802949	0.00740532	Modellparzelle
5	A			11.5952	50.6284	0.861623	0.0138827	0.799401	0.00598125	Modellparzelle
5	A			11.5953	50.6284	0.875279	0.00983111	0.812213	0.00689662	Modellparzelle
5	A			11.5951	50.6284	0.874371	0.00971724	0.805128	0.0060071	Modellparzelle
5	A			11.5952	50.6284	0.863351	0.0172606	0.799183	0.0111273	Modellparzelle
5	A			11.5953	50.6284	0.876442	0.0129551	0.813776	0.00797734	Modellparzelle
5	A			11.5951	50.6284	0.873461	0.0100935	0.80402	0.00503438	Modellparzelle
5	A			11.5952	50.6284	0.859702	0.0203674	0.794836	0.0149951	Modellparzelle
5	A			11.5953	50.6284	0.878553	0.0100864	0.815771	0.00703128	Modellparzelle
5	A			11.5951	50.6284	0.873606	0.011017	0.804905	0.00413423	Modellparzelle
5	A			11.5952	50.6284	0.864449	0.0172467	0.797372	0.0109053	Modellparzelle
5	A			11.5953	50.6284	0.87891	0.0119186	0.816148	0.00975337	Modellparzelle
5	A			11.5951	50.6284	0.868905	0.0124998	0.79751	0.00441808	Modellparzelle
5	A			11.5952	50.6284	0.8662	0.0167961	0.799085	0.00995559	Modellparzelle
5	A			11.5953	50.6284	0.878415	0.0114426	0.817115	0.00996554	Modellparzelle
5	A			11.5951	50.6284	0.865226	0.0121597	0.791997	0.00489461	Modellparzelle
5	A			11.5952	50.6284	0.870817	0.0118298	0.804057	0.00644802	Modellparzelle
5	A			11.5953	50.6284	0.880338	0.00986854	0.820509	0.00757963	Modellparzelle
5	A			11.5951	50.6284	0.867363	0.010027	0.794317	0.00662705	Modellparzelle
5	A			11.5952	50.6284	0.873635	0.0128311	0.805916	0.0081869	Modellparzelle
5	A			11.5953	50.6284	0.881334	0.00902093	0.820292	0.00511936	Modellparzelle
5	A			11.5951	50.6285	0.870837	0.0105027	0.799002	0.00800768	Modellparzelle
5	A			11.5952	50.6285	0.870303	0.0164639	0.802612	0.0120408	Modellparzelle
5	A			11.5953	50.6284	0.881218	0.00943648	0.816967	0.00718016	Modellparzelle
5	A			11.5951	50.6285	0.871633	0.00851692	0.801402	0.00826604	Modellparzelle
5	A			11.5952	50.6285	0.864424	0.0243253	0.794427	0.0177205	Modellparzelle
5	A			11.5953	50.6285	0.874326	0.0170346	0.809388	0.0132396	Modellparzelle
5	A			11.5951	50.6285	0.87397	0.00773132	0.803334	0.00803248	Modellparzelle
5	A			11.5952	50.6285	0.855106	0.0280353	0.782203	0.0185655	Modellparzelle
5	A			11.5953	50.6285	0.868048	0.0243807	0.803284	0.0186099	Modellparzelle
5	A			11.5951	50.6285	0.873361	0.00795597	0.800436	0.00627659	Modellparzelle
5	A			11.5952	50.6285	0.85031	0.0286631	0.777328	0.0187138	Modellparzelle
5	A			11.5953	50.6285	0.870315	0.0269737	0.806312	0.0197019	Modellparzelle
5	A			11.5951	50.6285	0.872861	0.00826129	0.797022	0.00640118	Modellparzelle
5	A			11.5952	50.6285	0.854626	0.0266215	0.78035	0.015715	Modellparzelle
5	A			11.5953	50.6285	0.876059	0.0237343	0.810105	0.0166063	Modellparzelle
5	A			11.5951	50.6285	0.876247	0.00888344	0.798074	0.0059962	Modellparzelle
5	A			11.5952	50.6285	0.855468	0.0235617	0.779914	0.0154688	Modellparzelle
5	A			11.5953	50.6285	0.881538	0.022415	0.816963	0.0135513	Modellparzelle
5	A			11.5951	50.6285	0.875839	0.00830498	0.800265	0.00591586	Modellparzelle
5	A			11.5952	50.6285	0.858392	0.0246523	0.787459	0.015001	Modellparzelle
5	A			11.5953	50.6285	0.8801	0.0251905	0.816845	0.0155957	Modellparzelle
5	A			11.5951	50.6286	0.869461	0.00884547	0.79415	0.00650081	Modellparzelle
5	A			11.5952	50.6285	0.864611	0.0202992	0.7944	0.00947121	Modellparzelle
5	A			11.5953	50.6285	0.879711	0.0236496	0.818399	0.0170097	Modellparzelle
5	A			11.5951	50.6286	0.861798	0.01243	0.787837	0.0138779	Modellparzelle
5	A			11.5952	50.6286	0.860811	0.0227408	0.792421	0.00915386	Modellparzelle
5	A			11.5953	50.6286	0.876687	0.0215073	0.814133	0.0134822	Modellparzelle
5	A			11.5951	50.6286	0.853358	0.0152751	0.780688	0.0128421	Modellparzelle
5	A			11.5952	50.6286	0.856315	0.0240659	0.784091	0.0117526	Modellparzelle
5	A			11.5953	50.6286	0.868964	0.0388329	0.809787	0.0237712	Modellparzelle
5	A			11.5951	50.6286	0.856	0.0187487	0.785672	0.0118044	Modellparzelle
5	A			11.5952	50.6286	0.860498	0.0288388	0.788541	0.016354	Modellparzelle
5	A			11.5953	50.6286	0.866763	0.0440571	0.803814	0.031287	Modellparzelle
5	A			11.5951	50.6286	0.860992	0.0174578	0.795168	0.0103792	Modellparzelle
[truncated: 6,101 more rows]

## Sheet: Ranis_2021_W_Raps
PG	Block	Position	Ertrag [dt/ha] Feuchtekorrigiert	x_dd	y_dd	04_20_ndvi	04_20_sd	06_28_ndvi	06_28_sd	07_13_ndvi	07_13_sd	Typ							NDVI-Werte
1	A	1	48.25	11.5932	50.629	0.72745	0.0124894	0.811603	0.00625927	0.723938	0.0210172	Ernteparzelle		Position der Ernteparzelle					2021-04-20
1	A	2	36.0309	11.5933	50.629	0.734434	0.0103055	0.814908	0.00581056	0.731549	0.0240203	Ernteparzelle							2021-06-28
1	A	3	43.2143	11.5935	50.629	0.723982	0.0188721	0.816776	0.00547728	0.752412	0.0158584	Ernteparzelle							2021-07-13
1	A	4	47.7766	11.5932	50.6288	0.716349	0.0295981	0.800922	0.00795464	0.74479	0.0161312	Ernteparzelle
1	A	5	43.2653	11.5934	50.6288	0.73444	0.0108995	0.815719	0.00667437	0.73031	0.0219989	Ernteparzelle
1	A	6	43.731	11.5935	50.6288	0.732253	0.0134416	0.813783	0.00556514	0.743295	0.0156706	Ernteparzelle
1	B	1	33.2013	11.5959	50.6288	0.698366	0.0320583	0.813662	0.00676395	0.687429	0.0249378	Ernteparzelle		1	2	3
1	B	2	32.2502	11.596	50.6288	0.710922	0.024502	0.810372	0.00843794	0.686691	0.0217824	Ernteparzelle
1	B	3	46.1834	11.5961	50.6288	0.710552	0.0325247	0.823132	0.00509715	0.702588	0.0195473	Ernteparzelle
1	B	4	48.5783	11.5958	50.6286	0.702988	0.0434129	0.818436	0.0109591	0.683454	0.0462888	Ernteparzelle
1	B	5	-	11.596	50.6286	0.708031	0.0231376	0.815594	0.00630465	0.660666	0.0286206	Ernteparzelle	kein Ertragswert!
1	B	6	-	11.5961	50.6286	0.707264	0.0350564	0.817281	0.00558856	0.674071	0.0220972	Ernteparzelle	kein Ertragswert!
1	C	1	37.6732	11.5947	50.6301	0.710835	0.0344176	0.807406	0.00822709	0.683743	0.026409	Ernteparzelle
1	C	2	32.6648	11.5948	50.6301	0.726751	0.0165645	0.810113	0.00730273	0.69063	0.0311965	Ernteparzelle
1	C	3	57.9336	11.5949	50.6301	0.723827	0.0272163	0.809526	0.00732278	0.712422	0.0333795	Ernteparzelle
1	C	4	36.1767	11.5947	50.63	0.706321	0.0413652	0.805509	0.00870588	0.691645	0.0344803	Ernteparzelle
1	C	5	44.2963	11.5948	50.63	0.728749	0.0231853	0.807023	0.00797557	0.692982	0.0300728	Ernteparzelle
1	C	6	61.1601	11.5949	50.63	0.715151	0.0318086	0.808196	0.00565374	0.707177	0.0316844	Ernteparzelle
1	D	1	30.7362	11.5966	50.6299	0.716196	0.0277866	0.815763	0.00803814	0.693645	0.0246433	Ernteparzelle
1	D	2	33.5252	11.5967	50.6299	0.691467	0.0572216	0.808216	0.00703188	0.667444	0.0323702	Ernteparzelle
1	D	3	57.2861	11.5968	50.6299	0.700607	0.0371836	0.81379	0.00754138	0.672215	0.0187796	Ernteparzelle
1	D	4	24.7535	11.5966	50.6298	0.693247	0.0528982	0.812234	0.00731263	0.674693	0.0289997	Ernteparzelle		4	5	6
1	D	5	50.3503	11.5967	50.6298	0.654863	0.069978	0.807847	0.00977582	0.687225	0.029146	Ernteparzelle
1	D	6	53.5758	11.5968	50.6298	0.672657	0.053457	0.799024	0.0193593	0.637484	0.0379609	Ernteparzelle
2	A	1	39.2726	11.5944	50.6289	0.730279	0.0179182	0.804495	0.00782399	0.676328	0.0311811	Ernteparzelle
2	A	2	33.1127	11.5945	50.6289	0.72563	0.0159623	0.80503	0.00625537	0.6669	0.0218986	Ernteparzelle
2	A	3	50.6604	11.5946	50.6289	0.725712	0.0329601	0.811295	0.004926	0.690491	0.0223143	Ernteparzelle
2	A	4	42.1878	11.5944	50.6287	0.72903	0.0217449	0.816249	0.00760431	0.723784	0.0350237	Ernteparzelle
2	A	5	30.1935	11.5945	50.6287	0.741139	0.0127231	0.818845	0.00541883	0.719928	0.0354837	Ernteparzelle
2	A	6	49.758	11.5946	50.6287	0.735392	0.0182003	0.817538	0.00676483	0.717849	0.0279213	Ernteparzelle
2	B	1	39.3661	11.597	50.6287	0.715001	0.0212566	0.819669	0.00649247	0.695669	0.0225206	Ernteparzelle
2	B	2	37.6785	11.5971	50.6287	0.727223	0.0190807	0.823529	0.00617322	0.699798	0.0274234	Ernteparzelle
2	B	3	53.5834	11.5972	50.6287	0.722142	0.0307448	0.819052	0.00704253	0.678771	0.0255892	Ernteparzelle
2	B	4	24.6115	11.597	50.6285	0.704262	0.0407544	0.820895	0.0067858	0.707458	0.0201976	Ernteparzelle
2	B	5	50.7424	11.5971	50.6285	0.715916	0.0334362	0.818744	0.00601312	0.692859	0.0221787	Ernteparzelle
2	B	6	46.3451	11.5972	50.6285	0.727943	0.0215929	0.823063	0.0060655	0.689829	0.0250826	Ernteparzelle
2	C	1	29.9366	11.5951	50.6301	0.701042	0.0305085	0.8063	0.00642464	0.695982	0.0200288	Ernteparzelle
2	C	2	37.056	11.5952	50.6301	0.717212	0.0321145	0.810955	0.0058072	0.685005	0.0242268	Ernteparzelle
2	C	3	59.2083	11.5953	50.63	0.712617	0.0281722	0.812719	0.00811302	0.710815	0.0242156	Ernteparzelle
2	C	4	27.9032	11.5951	50.63	0.711426	0.0291272	0.807527	0.00790892	0.699946	0.0291799	Ernteparzelle
2	C	5	44.1963	11.5952	50.63	0.73159	0.0139334	0.812518	0.00843967	0.694053	0.0314679	Ernteparzelle
2	C	6	59.9734	11.5953	50.6299	0.719302	0.0260078	0.812124	0.00843106	0.701218	0.0308228	Ernteparzelle
2	D	1	29.4985	11.5973	50.6299	0.693499	0.0553895	0.811881	0.00763315	0.694578	0.0275465	Ernteparzelle
2	D	2	33.1386	11.5974	50.6299	0.723039	0.0240089	0.813068	0.00720858	0.683638	0.0258713	Ernteparzelle
2	D	3	34.0732	11.5975	50.6299	0.705271	0.0445473	0.812332	0.0066263	0.703696	0.0170019	Ernteparzelle
2	D	4	-	11.5973	50.6298	0.71673	0.0390406	0.816166	0.00835652	0.692118	0.0357207	Ernteparzelle	kein Ertragswert!
2	D	5	-	11.5974	50.6298	0.714326	0.04795	0.815896	0.00830807	0.697973	0.027123	Ernteparzelle	kein Ertragswert!
2	D	6	67.9567	11.5975	50.6298	0.686136	0.0603325	0.813796	0.00643156	0.704954	0.0245432	Ernteparzelle
3	A	1	34.7596	11.594	50.6289	0.719676	0.0207446	0.803502	0.00925779	0.684464	0.0188885	Ernteparzelle
3	A	2	36.9711	11.5941	50.6289	0.736949	0.0108047	0.804352	0.00679729	0.662821	0.0242478	Ernteparzelle
3	A	3	46.1812	11.5942	50.6289	0.724208	0.0221807	0.801123	0.00669217	0.700732	0.020079	Ernteparzelle
3	A	4	49.1229	11.594	50.6287	0.714598	0.0208904	0.800443	0.00927618	0.691171	0.0367905	Ernteparzelle
3	A	5	52.6382	11.5941	50.6287	0.730163	0.015679	0.811619	0.00590098	0.707004	0.0303315	Ernteparzelle
3	A	6	39.5514	11.5942	50.6287	0.728707	0.0143663	0.814134	0.00562963	0.731098	0.0179015	Ernteparzelle
3	B	1	31.8904	11.5955	50.6288	0.713969	0.0297115	0.819417	0.00614862	0.703798	0.0204946	Ernteparzelle
3	B	2	24.0723	11.5956	50.6288	0.725437	0.018073	0.816882	0.00671684	0.68432	0.0238454	Ernteparzelle
3	B	3	65.3699	11.5957	50.6288	0.710075	0.0274616	0.80602	0.00719439	0.666292	0.0297181	Ernteparzelle
3	B	4	50.3755	11.5955	50.6286	0.713541	0.0410361	0.819648	0.00669378	0.701679	0.027561	Ernteparzelle
3	B	5	30.0927	11.5956	50.6286	0.557884	0.114905	0.796404	0.0162996	0.662195	0.0439035	Ernteparzelle
3	B	6	31.3589	11.5957	50.6286	0.638935	0.118372	0.787223	0.0238956	0.689347	0.0372272	Ernteparzelle
3	C	1	41.6282	11.5936	50.6302	0.714616	0.0173103	0.807377	0.00664863	0.728971	0.0167348	Ernteparzelle
3	C	2	43.4063	11.5937	50.6302	0.724751	0.0155506	0.809667	0.00645787	0.711766	0.0178894	Ernteparzelle
3	C	3	33.3851	11.5938	50.6302	0.724825	0.0229196	0.804981	0.00619974	0.71507	0.0213061	Ernteparzelle
3	C	4	40.0765	11.5936	50.6301	0.728851	0.0133344	0.809697	0.00572473	0.722016	0.0157007	Ernteparzelle
3	C	5	45.1386	11.5937	50.6301	0.734365	0.0134369	0.814136	0.00592673	0.738878	0.0207993	Ernteparzelle
3	C	6	71.9759	11.5938	50.6301	0.721241	0.0305771	0.810896	0.00622686	0.713606	0.019441	Ernteparzelle
3	D	1	34.1121	11.5958	50.63	0.689019	0.0373474	0.805154	0.00760347	0.681755	0.0258103	Ernteparzelle
3	D	2	34.1103	11.5959	50.63	0.715423	0.0321643	0.806194	0.00998378	0.694854	0.0265256	Ernteparzelle
3	D	3	47.8721	11.596	50.63	0.729022	0.0202497	0.81359	0.00661447	0.683759	0.0198861	Ernteparzelle
3	D	4	26.8709	11.5958	50.6299	0.693903	0.0398503	0.805479	0.00673383	0.654065	0.0262782	Ernteparzelle
3	D	5	38.4148	11.5959	50.6299	0.714794	0.0316098	0.812318	0.00687204	0.685785	0.0207086	Ernteparzelle
3	D	6	55.3361	11.596	50.6299	0.716333	0.0379034	0.815917	0.007204	0.713254	0.0161739	Ernteparzelle
4	A	1	50.9476	11.5936	50.629	0.731692	0.015531	0.819712	0.00502066	0.744394	0.0190435	Ernteparzelle
4	A	2	44.7425	11.5937	50.629	0.734183	0.0165695	0.819109	0.00619405	0.740216	0.0271223	Ernteparzelle
4	A	3	40.2138	11.5938	50.629	0.735349	0.0126596	0.819217	0.00445084	0.748181	0.0143455	Ernteparzelle
4	A	4	42.5719	11.5936	50.6287	0.725363	0.0168758	0.814617	0.00670955	0.738238	0.0229726	Ernteparzelle
4	A	5	40.1524	11.5937	50.6287	0.730142	0.0151106	0.813481	0.00649766	0.716245	0.0222668	Ernteparzelle
4	A	6	44.1741	11.5938	50.6287	0.730094	0.0118815	0.809835	0.00644722	0.708843	0.0204417	Ernteparzelle
4	B	1	38.6224	11.5966	50.6288	0.723429	0.0250597	0.82624	0.0062628	0.698074	0.0277444	Ernteparzelle
4	B	2	33.5217	11.5967	50.6287	0.718934	0.0180564	0.821259	0.00569241	0.700582	0.0235695	Ernteparzelle
4	B	3	56.6444	11.5968	50.6287	0.707869	0.024648	0.815537	0.00606859	0.686699	0.0264208	Ernteparzelle
4	B	4	28.8292	11.5966	50.6285	0.718233	0.0314026	0.820722	0.00662522	0.715555	0.019617	Ernteparzelle
4	B	5	43.5979	11.5967	50.6285	0.718936	0.0208552	0.820963	0.0060319	0.703456	0.0210571	Ernteparzelle
4	B	6	49.4302	11.5968	50.6285	0.720321	0.0233762	0.820905	0.00610946	0.700305	0.023526	Ernteparzelle
4	C	1	35.109	11.5943	50.6301	0.714326	0.0322152	0.81307	0.00646145	0.738377	0.020475	Ernteparzelle
4	C	2	44.2712	11.5944	50.6301	0.72206	0.0251096	0.814443	0.00628661	0.724921	0.0258956	Ernteparzelle
4	C	3	55.7396	11.5945	50.6301	0.719178	0.0234531	0.810077	0.0061979	0.695012	0.0206225	Ernteparzelle
4	C	4	34.7349	11.5943	50.63	0.706767	0.0286917	0.805409	0.00728532	0.708025	0.0243307	Ernteparzelle
4	C	5	47.2402	11.5944	50.63	0.726249	0.0185278	0.808554	0.00853151	0.689012	0.0330072	Ernteparzelle
4	C	6	54.8875	11.5945	50.63	0.722537	0.0263464	0.808844	0.00828507	0.701215	0.022868	Ernteparzelle
4	D	1	26.736	11.5954	50.63	0.651143	0.137209	0.807856	0.0142721	0.697682	0.0354359	Ernteparzelle
4	D	2	33.9498	11.5956	50.63	0.7217	0.0257696	0.812626	0.010457	0.671226	0.0295475	Ernteparzelle
4	D	3	57.7473	11.5957	50.63	0.715367	0.039423	0.808795	0.00791882	0.667677	0.0354671	Ernteparzelle
4	D	4	34.8465	11.5954	50.6299	0.690216	0.0527065	0.802221	0.0123524	0.647091	0.0497163	Ernteparzelle
4	D	5	54.4119	11.5956	50.6299	0.715443	0.0263667	0.779171	0.0507419	0.636705	0.0501656	Ernteparzelle
4	D	6	45.3066	11.5957	50.6299	0.704616	0.0327999	0.802429	0.0136456	0.642817	0.0341125	Ernteparzelle
5	A	1	41.9455	11.5951	50.6289	0.73265	0.012566	0.819295	0.00618685	0.703035	0.0222765	Ernteparzelle
5	A	2	36.3118	11.5952	50.6288	0.734648	0.0154639	0.82002	0.00501901	0.676197	0.0210849	Ernteparzelle
5	A	3	65.9884	11.5953	50.6288	0.722096	0.0211242	0.821361	0.00544833	0.697569	0.0209816	Ernteparzelle
5	A	4	42.184	11.5951	50.6286	0.726202	0.0193882	0.817781	0.00638271	0.693098	0.0242261	Ernteparzelle
5	A	5	30.9472	11.5952	50.6286	0.738065	0.0152363	0.821225	0.00493707	0.670017	0.0345675	Ernteparzelle
5	A	6	47.511	11.5953	50.6286	0.72475	0.0235067	0.820716	0.00547439	0.694185	0.0329048	Ernteparzelle
5	B	1	31.692	11.5974	50.6287	0.715692	0.0257769	0.81966	0.00619749	0.705488	0.0233736	Ernteparzelle
5	B	2	28.1474	11.5975	50.6287	0.719784	0.0221047	0.822252	0.00731236	0.68062	0.0253507	Ernteparzelle
5	B	3	55.9798	11.5976	50.6287	0.728084	0.0189305	0.824705	0.00549427	0.698877	0.0189776	Ernteparzelle
5	B	4	30.3944	11.5973	50.6285	0.699886	0.0365802	0.815686	0.00664541	0.668123	0.0232429	Ernteparzelle
5	B	5	36.1723	11.5975	50.6285	0.721078	0.0229898	0.819017	0.00895253	0.688353	0.0172382	Ernteparzelle
5	B	6	52.3415	11.5976	50.6285	0.704491	0.0648611	0.825426	0.00631394	0.705074	0.025963	Ernteparzelle
5	C	1	40.8965	11.5932	50.6302	0.707966	0.0193463	0.80004	0.00965589	0.718399	0.0231026	Ernteparzelle
5	C	2	42.8463	11.5933	50.6302	0.713481	0.021379	0.80924	0.00712926	0.712384	0.0252213	Ernteparzelle
5	C	3	48.4295	11.5934	50.6302	0.712409	0.0159701	0.810297	0.00667503	0.721833	0.0180633	Ernteparzelle
5	C	4	61.3175	11.5932	50.6301	0.720329	0.0202377	0.806669	0.00826538	0.735322	0.018486	Ernteparzelle
5	C	5	53.3947	11.5933	50.6301	0.723607	0.0143482	0.810685	0.00609406	0.718738	0.0173733	Ernteparzelle
5	C	6	47.0203	11.5934	50.6301	0.723774	0.0131102	0.812582	0.00574592	0.714543	0.0164041	Ernteparzelle
5	D	1	-	11.5962	50.63	0.709737	0.0262512	0.821425	0.00821884	0.716821	0.0273697	Ernteparzelle	kein Ertragswert!
5	D	2	23.5097	11.5963	50.63	0.727793	0.0237876	0.747561	0.114382	0.640727	0.0879476	Ernteparzelle
5	D	3	61.4143	11.5964	50.6299	0.717158	0.0363604	0.773437	0.0609538	0.684308	0.0561894	Ernteparzelle
5	D	4	31.3722	11.5962	50.6299	0.692902	0.0479882	0.817376	0.00980128	0.697046	0.0316471	Ernteparzelle
5	D	5	50.9889	11.5963	50.6299	0.721234	0.0257193	0.818191	0.00810078	0.713678	0.0243594	Ernteparzelle
5	D	6	48.8453	11.5964	50.6299	0.727592	0.019213	0.818202	0.00769973	0.708557	0.0238799	Ernteparzelle
6	A	1	36.9703	11.5947	50.6289	0.719788	0.0262679	0.813523	0.00542023	0.670355	0.0291402	Ernteparzelle
6	A	2	40.358	11.5949	50.6289	0.725164	0.0307954	0.818305	0.00679046	0.682806	0.0265262	Ernteparzelle
6	A	3	51.0809	11.595	50.6289	0.733522	0.0164594	0.820675	0.00532079	0.692459	0.0199071	Ernteparzelle
6	A	4	44.9029	11.5947	50.6287	0.722576	0.0228227	0.816689	0.00569953	0.714094	0.0317268	Ernteparzelle
6	A	5	40.3329	11.5949	50.6287	0.737004	0.0130055	0.823145	0.00471457	0.712578	0.0221572	Ernteparzelle
6	A	6	47.8597	11.595	50.6286	0.734319	0.0134747	0.818777	0.00535663	0.70227	0.0217049	Ernteparzelle
6	B	1	28.325	11.5962	50.6288	0.714114	0.0179224	0.821194	0.00572218	0.703682	0.0289913	Ernteparzelle
6	B	2	33.2051	11.5964	50.6288	0.722627	0.0191679	0.816064	0.00649574	0.690747	0.0221039	Ernteparzelle
6	B	3	58.7933	11.5965	50.6288	0.737439	0.00895344	0.823012	0.00715751	0.714299	0.0291011	Ernteparzelle
6	B	4	-	11.5962	50.6286	0.718121	0.0175112	0.813577	0.00607365	0.695037	0.0157393	Ernteparzelle	kein Ertragswert!
6	B	5	40.2757	11.5964	50.6285	0.728478	0.0217123	0.821838	0.00538272	0.711431	0.0279039	Ernteparzelle
6	B	6	68.2255	11.5965	50.6285	0.715955	0.033796	0.822174	0.00467108	0.7109	0.0209063	Ernteparzelle
6	C	1	45.5236	11.5939	50.6302	0.705591	0.0335241	0.798927	0.00834582	0.709395	0.0250542	Ernteparzelle
6	C	2	44.4761	11.5941	50.6302	0.72739	0.0167934	0.808103	0.00591337	0.694059	0.0260095	Ernteparzelle
6	C	3	51.1229	11.5942	50.6301	0.724168	0.0361064	0.81033	0.00676561	0.731093	0.0174295	Ernteparzelle
6	C	4	30.1631	11.5939	50.6301	0.712176	0.0282089	0.798013	0.00934945	0.697583	0.0203082	Ernteparzelle
6	C	5	50.4105	11.5941	50.63	0.71517	0.0306849	0.803172	0.0109739	0.686783	0.0215944	Ernteparzelle
6	C	6	48.2609	11.5942	50.63	0.708025	0.034582	0.806048	0.0058972	0.719953	0.0358098	Ernteparzelle
6	D	1	31.4594	11.5969	50.6299	0.67744	0.0657703	0.809695	0.00730278	0.67219	0.031228	Ernteparzelle
6	D	2	31.4214	11.5971	50.6299	0.722702	0.0234183	0.817833	0.00561141	0.690945	0.0265623	Ernteparzelle
6	D	3	60.2179	11.5972	50.6299	0.718844	0.0288992	0.817411	0.00496725	0.714101	0.0239515	Ernteparzelle
6	D	4	19.9626	11.5969	50.6298	0.695549	0.04776	0.806686	0.00850646	0.656542	0.0334166	Ernteparzelle
6	D	5	45.5182	11.5971	50.6298	0.716274	0.0224033	0.809863	0.00844937	0.666936	0.0276551	Ernteparzelle
6	D	6	68.6828	11.5972	50.6298	0.703598	0.0312668	0.814389	0.00555131	0.702293	0.023985	Ernteparzelle
5	B			11.5974	50.6277	0.709429	0.0268894	0.820227	0.00580868	0.70443	0.0231086	Modellparzelle
5	B			11.5973	50.6277	0.693802	0.0375706	0.817604	0.00613321	0.70842	0.0151133	Modellparzelle
5	B			11.5972	50.6277	0.724024	0.0157566	0.815103	0.0101178	0.694715	0.0231517	Modellparzelle
5	B			11.5974	50.6277	0.715126	0.0237454	0.821557	0.00611999	0.706699	0.0170282	Modellparzelle
5	B			11.5973	50.6277	0.696157	0.0394804	0.817527	0.00647372	0.703088	0.0177653	Modellparzelle
5	B			11.5972	50.6277	0.71412	0.0290117	0.815889	0.00754881	0.690325	0.0262113	Modellparzelle
5	B			11.5974	50.6277	0.722371	0.01922	0.820083	0.00641297	0.702412	0.0226614	Modellparzelle
5	B			11.5973	50.6277	0.687585	0.0491532	0.814493	0.00805429	0.703061	0.0156611	Modellparzelle
5	B			11.5971	50.6277	0.69419	0.0366181	0.812043	0.00769875	0.687299	0.0235201	Modellparzelle
5	B			11.5974	50.6277	0.70312	0.0383092	0.817501	0.00666213	0.696605	0.0186771	Modellparzelle
5	B			11.5972	50.6277	0.684394	0.0369242	0.811847	0.00793294	0.69876	0.0170861	Modellparzelle
5	B			11.5971	50.6277	0.689703	0.03095	0.809534	0.00781351	0.690218	0.0188753	Modellparzelle
5	B			11.5973	50.6276	0.711015	0.021549	0.815918	0.00738449	0.692239	0.0232026	Modellparzelle
5	B			11.5972	50.6277	0.652079	0.0705706	0.809506	0.00745256	0.695498	0.0176097	Modellparzelle
5	B			11.5971	50.6277	0.67603	0.0387993	0.808377	0.0087969	0.684918	0.019719	Modellparzelle
5	B			11.5973	50.6276	0.685573	0.0540081	0.814516	0.00649093	0.69141	0.0179558	Modellparzelle
5	B			11.5972	50.6276	0.6328	0.0967174	0.808291	0.00676487	0.692068	0.0195307	Modellparzelle
5	B			11.5971	50.6276	0.693499	0.0261993	0.811638	0.00884255	0.693146	0.0198795	Modellparzelle
5	B			11.5973	50.6276	0.671509	0.072819	0.810741	0.00698796	0.684777	0.0279732	Modellparzelle
5	B			11.5972	50.6276	0.632581	0.0842734	0.804615	0.00796188	0.677023	0.0244955	Modellparzelle
5	B			11.5971	50.6276	0.69111	0.0378652	0.809564	0.00700928	0.688678	0.0193103	Modellparzelle
5	B			11.5973	50.6276	0.682949	0.0488077	0.809266	0.00624519	0.676743	0.0302854	Modellparzelle
5	B			11.5972	50.6276	0.666951	0.0558265	0.807008	0.0084916	0.671896	0.0196838	Modellparzelle
5	B			11.5971	50.6276	0.691161	0.0373648	0.807848	0.00899745	0.699186	0.0193706	Modellparzelle
5	B			11.5973	50.6276	0.691121	0.0334655	0.810834	0.00817174	0.685861	0.0287476	Modellparzelle
5	B			11.5972	50.6276	0.673721	0.0496863	0.807165	0.00884843	0.675919	0.0223087	Modellparzelle
5	B			11.5971	50.6276	0.680138	0.0412792	0.801794	0.0119958	0.696117	0.0145091	Modellparzelle
5	B			11.5973	50.6276	0.680954	0.0351252	0.809631	0.00841336	0.673654	0.0306427	Modellparzelle
5	B			11.5972	50.6276	0.669475	0.0444564	0.80232	0.0109628	0.669521	0.0253938	Modellparzelle
5	B			11.5971	50.6276	0.674059	0.0418662	0.793318	0.0259753	0.690489	0.0175619	Modellparzelle
5	B			11.5973	50.6276	0.685661	0.030882	0.807245	0.00765167	0.666794	0.0275155	Modellparzelle
5	B			11.5972	50.6276	0.651534	0.0654401	0.796394	0.0129778	0.651281	0.0352878	Modellparzelle
5	B			11.5971	50.6276	0.662462	0.0522622	0.786718	0.0280385	0.678741	0.0246269	Modellparzelle
5	B			11.5972	50.6277	0.711513	0.0197225	0.811692	0.010032	0.693335	0.0188302	Modellparzelle
5	B			11.5973	50.6277	0.68591	0.0450071	0.81547	0.00649394	0.693961	0.0206508	Modellparzelle
5	B			11.5974	50.6277	0.71143	0.0292614	0.816891	0.0068686	0.706987	0.0176271	Modellparzelle
5	B			11.5972	50.6277	0.706189	0.0235532	0.811824	0.00967062	0.70197	0.0138935	Modellparzelle
5	B			11.5973	50.6277	0.666632	0.0546119	0.810525	0.00548931	0.699696	0.0209903	Modellparzelle
5	B			11.5974	50.6277	0.723352	0.0149621	0.815655	0.00699301	0.710336	0.0166712	Modellparzelle
5	B			11.5972	50.6278	0.693321	0.0410842	0.80953	0.0108212	0.690026	0.0152975	Modellparzelle
5	B			11.5973	50.6277	0.674512	0.0420345	0.809417	0.00821938	0.710139	0.016388	Modellparzelle
5	B			11.5974	50.6277	0.71831	0.0298397	0.81619	0.00666245	0.69714	0.0199789	Modellparzelle
5	B			11.5972	50.6278	0.684038	0.0430396	0.807014	0.0100564	0.683724	0.0178841	Modellparzelle
5	B			11.5973	50.6278	0.687569	0.0361401	0.814167	0.00841873	0.702216	0.0244655	Modellparzelle
5	B			11.5974	50.6277	0.719066	0.0212376	0.813646	0.00658417	0.692796	0.0213069	Modellparzelle
5	B			11.5972	50.6278	0.685958	0.0345807	0.800062	0.0112257	0.676354	0.0221657	Modellparzelle
5	B			11.5973	50.6278	0.704855	0.0410021	0.813268	0.0119858	0.691753	0.0291101	Modellparzelle
5	B			11.5974	50.6278	0.709792	0.0267745	0.808258	0.00769209	0.683923	0.0249383	Modellparzelle
5	B			11.5972	50.6278	0.691878	0.028647	0.801685	0.00987888	0.684515	0.0186134	Modellparzelle
5	B			11.5973	50.6278	0.694878	0.0375191	0.814196	0.00705483	0.696879	0.0215011	Modellparzelle
5	B			11.5974	50.6278	0.714759	0.017748	0.808843	0.00708303	0.682361	0.0221617	Modellparzelle
5	B			11.5972	50.6278	0.689343	0.0357709	0.806891	0.00896218	0.687698	0.0158974	Modellparzelle
5	B			11.5973	50.6278	0.689206	0.034644	0.811827	0.00671563	0.690906	0.0205671	Modellparzelle
5	B			11.5974	50.6278	0.701482	0.0342944	0.806682	0.00747724	0.676619	0.0210843	Modellparzelle
5	B			11.5972	50.6278	0.695887	0.0305764	0.808119	0.00947524	0.679996	0.0177507	Modellparzelle
5	B			11.5973	50.6278	0.685028	0.0349427	0.80408	0.00780896	0.680708	0.015952	Modellparzelle
5	B			11.5974	50.6278	0.704372	0.0285251	0.807788	0.00700605	0.67562	0.0198176	Modellparzelle
5	B			11.5972	50.6278	0.689989	0.0312369	0.802005	0.011867	0.659378	0.0249417	Modellparzelle
5	B			11.5973	50.6278	0.681134	0.0483609	0.80118	0.00846561	0.663168	0.0244681	Modellparzelle
5	B			11.5974	50.6278	0.709367	0.0298044	0.808816	0.00735688	0.67656	0.0277369	Modellparzelle
5	B			11.5972	50.6278	0.689924	0.0276979	0.801827	0.0143554	0.658909	0.0200754	Modellparzelle
5	B			11.5973	50.6278	0.686379	0.0429754	0.800087	0.00996907	0.666869	0.0195387	Modellparzelle
5	B			11.5974	50.6278	0.71263	0.0250452	0.806061	0.00855886	0.65543	0.0337954	Modellparzelle
5	B			11.5972	50.6279	0.691157	0.0240804	0.796555	0.00987433	0.655257	0.0304025	Modellparzelle
5	B			11.5973	50.6278	0.695822	0.0387688	0.807125	0.00859314	0.684159	0.0161072	Modellparzelle
5	B			11.5974	50.6278	0.711467	0.0228008	0.807104	0.00768804	0.67197	0.0242572	Modellparzelle
5	B			11.5972	50.6279	0.684824	0.029441	0.79103	0.0163808	0.656658	0.0257121	Modellparzelle
5	B			11.5973	50.6279	0.682777	0.0496572	0.80434	0.00724209	0.679405	0.0159729	Modellparzelle
5	B			11.5974	50.6279	0.7067	0.0304149	0.808743	0.00817265	0.693195	0.0203405	Modellparzelle
5	B			11.5972	50.6279	0.688147	0.035877	0.783209	0.0205871	0.651292	0.0343163	Modellparzelle
5	B			11.5973	50.6279	0.668928	0.0788441	0.804426	0.00955504	0.689556	0.0289127	Modellparzelle
5	B			11.5974	50.6279	0.709536	0.0231412	0.815879	0.00773626	0.70944	0.022229	Modellparzelle
5	B			11.5972	50.6279	0.686295	0.0380482	0.791895	0.0163819	0.662969	0.0312984	Modellparzelle
5	B			11.5973	50.6279	0.602971	0.123545	0.801026	0.0102965	0.695895	0.0230476	Modellparzelle
5	B			11.5974	50.6279	0.70914	0.0280931	0.817155	0.00723866	0.713952	0.0191012	Modellparzelle
5	B			11.5972	50.6279	0.685378	0.0372439	0.79518	0.0176184	0.67319	0.0350302	Modellparzelle
5	B			11.5973	50.6279	0.549188	0.164643	0.79535	0.0145636	0.684832	0.0247145	Modellparzelle
5	B			11.5974	50.6279	0.710248	0.0249236	0.816661	0.0119275	0.705013	0.0243617	Modellparzelle
5	B			11.5972	50.6279	0.670472	0.0454745	0.79546	0.0170898	0.679664	0.0292042	Modellparzelle
5	B			11.5973	50.6279	0.524317	0.188922	0.791756	0.0149576	0.693129	0.0245995	Modellparzelle
5	B			11.5974	50.6279	0.70003	0.0356471	0.81433	0.00949488	0.693546	0.0223556	Modellparzelle
5	B			11.5972	50.6279	0.61164	0.0906385	0.791629	0.0172171	0.672226	0.0212568	Modellparzelle
5	B			11.5973	50.6279	0.554637	0.163358	0.79176	0.0134178	0.700427	0.0216722	Modellparzelle
5	B			11.5974	50.6279	0.716888	0.0304772	0.812971	0.00799023	0.690027	0.0271518	Modellparzelle
5	B			11.5972	50.628	0.525928	0.149312	0.782183	0.0244122	0.67039	0.0265432	Modellparzelle
5	B			11.5973	50.6279	0.569588	0.1581	0.791314	0.0177239	0.704254	0.019916	Modellparzelle
5	B			11.5974	50.6279	0.708154	0.051499	0.81379	0.0069445	0.687272	0.0220274	Modellparzelle
5	B			11.5972	50.628	0.40096	0.179239	0.746411	0.0315987	0.665481	0.0417794	Modellparzelle
5	B			11.5973	50.628	0.677398	0.0618712	0.796891	0.0218763	0.711294	0.0200539	Modellparzelle
5	B			11.5974	50.6279	0.691889	0.0789822	0.816262	0.00826619	0.692473	0.0230684	Modellparzelle
5	B			11.5972	50.628	0.36644	0.181768	0.724263	0.0569967	0.670838	0.0383161	Modellparzelle
5	B			11.5973	50.628	0.693826	0.0418576	0.803476	0.0205358	0.702499	0.0186925	Modellparzelle
5	B			11.5975	50.628	0.687023	0.0642952	0.814557	0.00908778	0.679816	0.0298262	Modellparzelle
5	B			11.5972	50.628	0.542746	0.152061	0.756362	0.0307268	0.666076	0.0333848	Modellparzelle
5	B			11.5974	50.628	0.688174	0.0558496	0.813895	0.00973368	0.706073	0.0202339	Modellparzelle
5	B			11.5975	50.628	0.688566	0.0692031	0.81557	0.0104046	0.688405	0.0393649	Modellparzelle
5	B			11.5973	50.628	0.653379	0.0649481	0.786744	0.0222551	0.676001	0.0513938	Modellparzelle
5	B			11.5974	50.628	0.683016	0.0604584	0.81602	0.00629083	0.699922	0.024173	Modellparzelle
5	B			11.5975	50.628	0.668757	0.068386	0.812954	0.00915918	0.677152	0.0330214	Modellparzelle
5	B			11.5973	50.628	0.687631	0.0381381	0.79174	0.0238838	0.690174	0.0359501	Modellparzelle
5	B			11.5974	50.628	0.642672	0.101046	0.811378	0.00874296	0.700447	0.0189985	Modellparzelle
5	B			11.5975	50.628	0.684585	0.0566253	0.810945	0.0088928	0.675339	0.032154	Modellparzelle
5	B			11.5973	50.628	0.678557	0.0523404	0.800519	0.0234061	0.703366	0.0254549	Modellparzelle
5	B			11.5974	50.628	0.601219	0.130649	0.810399	0.00768263	0.698985	0.021243	Modellparzelle
5	B			11.5975	50.628	0.682827	0.0529346	0.809305	0.00808272	0.653029	0.0234815	Modellparzelle
5	B			11.5973	50.628	0.683631	0.053597	0.809592	0.0122901	0.704841	0.0268871	Modellparzelle
5	B			11.5974	50.628	0.6173	0.115564	0.808782	0.00837015	0.702298	0.0168031	Modellparzelle
5	B			11.5975	50.628	0.707794	0.0352128	0.807584	0.00808501	0.655207	0.0213573	Modellparzelle
5	B			11.5973	50.6281	0.673422	0.0739792	0.81574	0.00911751	0.692838	0.0315277	Modellparzelle
5	B			11.5974	50.628	0.624354	0.0754719	0.807235	0.00888305	0.700279	0.015452	Modellparzelle
5	B			11.5975	50.628	0.715645	0.0290492	0.813296	0.00708123	0.666042	0.0279074	Modellparzelle
5	B			11.5973	50.6281	0.67807	0.0592763	0.815414	0.00886105	0.705009	0.0234941	Modellparzelle
5	B			11.5974	50.6281	0.650942	0.0662299	0.808468	0.00816409	0.70513	0.0150921	Modellparzelle
5	B			11.5975	50.6281	0.715997	0.0336911	0.813337	0.00912427	0.668783	0.0379316	Modellparzelle
5	B			11.5973	50.6281	0.686997	0.0551027	0.815461	0.00768024	0.707811	0.016341	Modellparzelle
5	B			11.5974	50.6281	0.678004	0.0490869	0.808317	0.00862791	0.693399	0.0216212	Modellparzelle
5	B			11.5975	50.6281	0.71408	0.0314985	0.814356	0.00577018	0.678679	0.0191277	Modellparzelle
5	B			11.5973	50.6281	0.689237	0.052237	0.817364	0.00792603	0.708604	0.0232201	Modellparzelle
5	B			11.5974	50.6281	0.692586	0.0426092	0.810563	0.00729467	0.681125	0.0229047	Modellparzelle
5	B			11.5975	50.6281	0.715066	0.0312451	0.815656	0.00666357	0.691913	0.0225814	Modellparzelle
5	B			11.5973	50.6281	0.692574	0.0360138	0.818419	0.0075566	0.7148	0.025151	Modellparzelle
5	B			11.5974	50.6281	0.707534	0.0296982	0.813562	0.00656637	0.689538	0.0197886	Modellparzelle
5	B			11.5975	50.6281	0.713144	0.0217145	0.81659	0.00693874	0.70497	0.0203001	Modellparzelle
5	B			11.5973	50.6281	0.700937	0.0261899	0.816131	0.00687054	0.702305	0.0292002	Modellparzelle
5	B			11.5974	50.6281	0.715511	0.0260998	0.814892	0.00884272	0.690849	0.0309259	Modellparzelle
5	B			11.5975	50.6281	0.690484	0.0595633	0.816282	0.00651182	0.704086	0.0260608	Modellparzelle
5	B			11.5973	50.6281	0.716166	0.0248097	0.814498	0.00603247	0.7036	0.0236447	Modellparzelle
5	B			11.5974	50.6281	0.718024	0.0230862	0.818054	0.00735777	0.702919	0.0182773	Modellparzelle
5	B			11.5975	50.6281	0.65962	0.0884761	0.815942	0.00588993	0.711153	0.0191829	Modellparzelle
5	B			11.5973	50.6282	0.722311	0.018074	0.814727	0.00810855	0.706334	0.0250208	Modellparzelle
5	B			11.5974	50.6281	0.712903	0.0365121	0.820943	0.0067702	0.701059	0.0225996	Modellparzelle
5	B			11.5975	50.6281	0.650523	0.0795967	0.813469	0.00712639	0.698649	0.0257506	Modellparzelle
5	B			11.5973	50.6282	0.723449	0.0167192	0.817068	0.00671692	0.71046	0.0180939	Modellparzelle
5	B			11.5974	50.6282	0.714244	0.0316219	0.819463	0.00577366	0.709426	0.0166115	Modellparzelle
5	B			11.5975	50.6281	0.648203	0.0719939	0.812621	0.00713909	0.702385	0.018924	Modellparzelle
5	B			11.5973	50.6282	0.709834	0.0231107	0.813834	0.0067553	0.70568	0.0249833	Modellparzelle
5	B			11.5974	50.6282	0.707718	0.0374518	0.816947	0.00653186	0.691256	0.0235762	Modellparzelle
5	B			11.5975	50.6282	0.648595	0.0644816	0.807133	0.00918299	0.683933	0.0298871	Modellparzelle
5	B			11.5973	50.6282	0.701291	0.0383611	0.811503	0.00746037	0.695981	0.0213526	Modellparzelle
5	B			11.5974	50.6282	0.707056	0.0347252	0.811475	0.00650335	0.691223	0.023866	Modellparzelle
5	B			11.5975	50.6282	0.607235	0.107307	0.803893	0.00804083	0.674475	0.0220593	Modellparzelle
5	B			11.5973	50.6282	0.698973	0.030708	0.814319	0.00903546	0.686803	0.0257998	Modellparzelle
5	B			11.5974	50.6282	0.708907	0.0306769	0.806325	0.00768736	0.687925	0.0185594	Modellparzelle
5	B			11.5975	50.6282	0.616971	0.135486	0.802591	0.00706524	0.668416	0.0199661	Modellparzelle
5	B			11.5973	50.6282	0.699611	0.0264163	0.813289	0.0100041	0.697463	0.0182876	Modellparzelle
5	B			11.5974	50.6282	0.709271	0.0276308	0.806283	0.00678457	0.690623	0.0151641	Modellparzelle
5	B			11.5975	50.6282	0.654083	0.0669639	0.80484	0.00679649	0.669782	0.026702	Modellparzelle
5	B			11.5973	50.6282	0.702583	0.0272366	0.808741	0.00883309	0.677762	0.0259997	Modellparzelle
5	B			11.5974	50.6282	0.707766	0.0328782	0.803267	0.00777589	0.688015	0.0278611	Modellparzelle
5	B			11.5975	50.6282	0.676028	0.0548129	0.809241	0.0063973	0.692914	0.0188543	Modellparzelle
5	B			11.5973	50.6282	0.698974	0.0355321	0.812076	0.009523	0.676704	0.0224977	Modellparzelle
5	B			11.5974	50.6282	0.705916	0.0298611	0.803278	0.00759863	0.683086	0.0269791	Modellparzelle
5	B			11.5975	50.6282	0.704078	0.0366105	0.810223	0.00567151	0.696553	0.0166846	Modellparzelle
5	B			11.5973	50.6283	0.701326	0.0317891	0.811083	0.0109153	0.682685	0.0180602	Modellparzelle
5	B			11.5974	50.6282	0.700686	0.0418319	0.806494	0.00757844	0.695491	0.0185661	Modellparzelle
5	B			11.5975	50.6282	0.701964	0.034424	0.812633	0.00882226	0.679248	0.03192	Modellparzelle
5	B			11.5973	50.6283	0.709463	0.028456	0.816024	0.0093001	0.689481	0.0228661	Modellparzelle
5	B			11.5974	50.6283	0.711223	0.0240537	0.812778	0.00666979	0.696852	0.0252806	Modellparzelle
5	B			11.5975	50.6283	0.707642	0.0372065	0.815308	0.00714911	0.687024	0.0252474	Modellparzelle
5	B			11.5973	50.6283	0.710595	0.0245647	0.818958	0.00704434	0.701815	0.0211576	Modellparzelle
5	B			11.5974	50.6283	0.710439	0.023305	0.815976	0.0053464	0.695102	0.0271071	Modellparzelle
5	B			11.5975	50.6283	0.705776	0.031673	0.815888	0.00666944	0.702872	0.0192445	Modellparzelle
5	B			11.5973	50.6283	0.711977	0.0254173	0.822361	0.00682927	0.709246	0.0170644	Modellparzelle
5	B			11.5974	50.6283	0.719985	0.0247646	0.815643	0.00584584	0.695634	0.0288959	Modellparzelle
5	B			11.5975	50.6283	0.71882	0.0269779	0.818291	0.00644926	0.697531	0.0257877	Modellparzelle
5	B			11.5973	50.6283	0.708719	0.0301294	0.819928	0.00986834	0.701534	0.0244713	Modellparzelle
5	B			11.5974	50.6283	0.721628	0.021853	0.8158	0.00825049	0.693145	0.0249897	Modellparzelle
5	B			11.5975	50.6283	0.708243	0.0565058	0.819195	0.00614498	0.687854	0.0258122	Modellparzelle
5	B			11.5973	50.6283	0.716419	0.0266723	0.818945	0.00739487	0.700876	0.0272621	Modellparzelle
5	B			11.5974	50.6283	0.716915	0.030028	0.81472	0.00702208	0.678331	0.0242563	Modellparzelle
5	B			11.5975	50.6283	0.718501	0.03656	0.81854	0.00790605	0.684247	0.0294079	Modellparzelle
5	B			11.5973	50.6283	0.720131	0.0213393	0.822891	0.00615862	0.699272	0.0249419	Modellparzelle
5	B			11.5974	50.6283	0.713513	0.034605	0.816418	0.00516329	0.683192	0.023922	Modellparzelle
5	B			11.5975	50.6283	0.716882	0.0264974	0.820926	0.0064852	0.684922	0.0246566	Modellparzelle
5	B			11.5973	50.6284	0.713437	0.0309769	0.82031	0.00646369	0.695536	0.0232318	Modellparzelle
5	B			11.5974	50.6283	0.718753	0.0234038	0.817038	0.00615506	0.683898	0.022674	Modellparzelle
5	B			11.5975	50.6283	0.720057	0.0231367	0.821697	0.00736091	0.680247	0.0268456	Modellparzelle
5	B			11.5973	50.6284	0.71546	0.025399	0.820509	0.00630192	0.696553	0.0221882	Modellparzelle
5	B			11.5974	50.6284	0.722066	0.0195429	0.819062	0.00858181	0.682451	0.0249203	Modellparzelle
5	B			11.5975	50.6283	0.72684	0.0243743	0.822762	0.00626688	0.688863	0.0253295	Modellparzelle
5	B			11.5973	50.6284	0.718123	0.0212794	0.82176	0.00601924	0.703888	0.0193313	Modellparzelle
5	B			11.5974	50.6284	0.720044	0.0246473	0.819917	0.00700914	0.683327	0.0236146	Modellparzelle
5	B			11.5975	50.6284	0.725635	0.028948	0.823198	0.00691914	0.69903	0.0270729	Modellparzelle
5	B			11.5973	50.6284	0.71122	0.0229392	0.820558	0.00657698	0.69702	0.0208312	Modellparzelle
5	B			11.5974	50.6284	0.715235	0.0259149	0.819294	0.00691145	0.696089	0.0194118	Modellparzelle
5	B			11.5975	50.6284	0.719729	0.0354444	0.826027	0.00579294	0.692954	0.0273712	Modellparzelle
5	B			11.5973	50.6284	0.703011	0.0295596	0.818664	0.00667461	0.688754	0.023053	Modellparzelle
5	B			11.5974	50.6284	0.723647	0.0189128	0.817394	0.00861501	0.688833	0.0275625	Modellparzelle
5	B			11.5975	50.6284	0.722839	0.0285793	0.825351	0.00580611	0.703425	0.0212177	Modellparzelle
5	B			11.5973	50.6284	0.710256	0.0282151	0.815204	0.00676978	0.690249	0.0207776	Modellparzelle
5	B			11.5974	50.6284	0.723871	0.0241832	0.821008	0.00797852	0.698932	0.0339701	Modellparzelle
5	B			11.5975	50.6284	0.726517	0.020538	0.825988	0.00591847	0.693005	0.0223508	Modellparzelle
5	B			11.5973	50.6284	0.699317	0.0342509	0.813766	0.00782537	0.676447	0.0301178	Modellparzelle
5	B			11.5974	50.6284	0.719558	0.0208073	0.820334	0.00605052	0.685473	0.0309843	Modellparzelle
5	B			11.5975	50.6284	0.720744	0.0268942	0.826238	0.0052769	0.697502	0.0264096	Modellparzelle
5	B			11.5973	50.6284	0.696773	0.0325722	0.815645	0.0064949	0.674628	0.0185864	Modellparzelle
5	B			11.5974	50.6284	0.71936	0.0197714	0.818163	0.00677507	0.677305	0.0212071	Modellparzelle
5	B			11.5976	50.6284	0.720502	0.0226202	0.823159	0.00700495	0.694516	0.0253443	Modellparzelle
5	B			11.5973	50.6285	0.689454	0.0354554	0.815747	0.00722043	0.680254	0.0269248	Modellparzelle
5	B			11.5974	50.6284	0.711035	0.0346795	0.817634	0.00805166	0.684782	0.0257614	Modellparzelle
5	B			11.5976	50.6284	0.718468	0.0316565	0.824592	0.00675274	0.695769	0.0179665	Modellparzelle
5	B			11.5973	50.6285	0.699209	0.036231	0.815866	0.00680191	0.676172	0.021547	Modellparzelle
5	B			11.5974	50.6285	0.720651	0.0240444	0.819441	0.00741923	0.689517	0.0206915	Modellparzelle
5	B			11.5976	50.6285	0.716569	0.0319427	0.823908	0.00608011	0.699441	0.0246181	Modellparzelle
5	B			11.5973	50.6285	0.697898	0.0365905	0.814665	0.00643264	0.664952	0.0213545	Modellparzelle
5	B			11.5975	50.6285	0.722538	0.0185027	0.818205	0.00875476	0.694007	0.0183443	Modellparzelle
5	B			11.5976	50.6285	0.720593	0.0434681	0.826304	0.00553062	0.699027	0.0232921	Modellparzelle
5	B			11.5973	50.6285	0.697306	0.040167	0.81432	0.00709707	0.663184	0.0278339	Modellparzelle
5	B			11.5975	50.6285	0.719461	0.0205899	0.81578	0.00725117	0.695167	0.0224082	Modellparzelle
5	B			11.5976	50.6285	0.723272	0.0221361	0.821453	0.00601462	0.687802	0.0267186	Modellparzelle
5	B			11.5973	50.6285	0.706355	0.029492	0.8116	0.00721349	0.662893	0.0335636	Modellparzelle
5	B			11.5975	50.6285	0.720119	0.0217789	0.815935	0.00654976	0.69125	0.0298341	Modellparzelle
5	B			11.5976	50.6285	0.717877	0.0252382	0.820492	0.0064734	0.684103	0.0217549	Modellparzelle
5	B			11.5974	50.6285	0.704367	0.0312356	0.810698	0.008132	0.653135	0.0224126	Modellparzelle
5	B			11.5975	50.6285	0.714532	0.024782	0.814721	0.00736122	0.691319	0.0208317	Modellparzelle
5	B			11.5976	50.6285	0.721701	0.0208814	0.82148	0.00685554	0.681401	0.0298356	Modellparzelle
5	B			11.5974	50.6285	0.694166	0.0433442	0.813204	0.00646939	0.666373	0.0237755	Modellparzelle
5	B			11.5975	50.6285	0.710761	0.0219003	0.812138	0.00942031	0.681953	0.0288421	Modellparzelle
5	B			11.5976	50.6285	0.721856	0.0233437	0.820257	0.00644394	0.686062	0.0200448	Modellparzelle
5	B			11.5974	50.6286	0.701091	0.0402442	0.820227	0.0058517	0.684147	0.0185178	Modellparzelle
5	B			11.5975	50.6285	0.704554	0.0344289	0.816086	0.00620727	0.69236	0.0207318	Modellparzelle
5	B			11.5976	50.6285	0.711189	0.04428	0.820131	0.00625359	0.696259	0.0204331	Modellparzelle
5	B			11.5974	50.6286	0.690626	0.0490744	0.818095	0.00676268	0.683398	0.02523	Modellparzelle
5	B			11.5975	50.6286	0.711842	0.0227253	0.816098	0.00962311	0.687587	0.0264885	Modellparzelle
5	B			11.5976	50.6285	0.722197	0.0282865	0.821184	0.0055739	0.693456	0.0256829	Modellparzelle
5	B			11.5974	50.6286	0.704653	0.0391368	0.818547	0.00648708	0.675307	0.0229371	Modellparzelle
5	B			11.5975	50.6286	0.709458	0.0384528	0.817925	0.00607399	0.694812	0.0252819	Modellparzelle
5	B			11.5976	50.6286	0.719197	0.0346359	0.821814	0.0053275	0.697871	0.0235972	Modellparzelle
5	B			11.5974	50.6286	0.705011	0.0387949	0.817092	0.00622479	0.677077	0.0194859	Modellparzelle
5	B			11.5975	50.6286	0.714019	0.0316605	0.818637	0.00750605	0.703819	0.0229039	Modellparzelle
5	B			11.5976	50.6286	0.712289	0.0297198	0.819059	0.00816712	0.683511	0.0250616	Modellparzelle
5	B			11.5974	50.6286	0.707922	0.033881	0.815671	0.00680642	0.665783	0.0304939	Modellparzelle
5	B			11.5975	50.6286	0.707331	0.02997	0.818798	0.00678306	0.698073	0.0281158	Modellparzelle
5	B			11.5976	50.6286	0.717698	0.026305	0.817907	0.00888337	0.67452	0.027382	Modellparzelle
5	B			11.5974	50.6286	0.701463	0.0443615	0.813813	0.00821509	0.668104	0.0323918	Modellparzelle
5	B			11.5975	50.6286	0.712842	0.0318602	0.819792	0.00723414	0.684863	0.0239117	Modellparzelle
5	B			11.5976	50.6286	0.707316	0.0433786	0.82157	0.00514269	0.685268	0.0288632	Modellparzelle
5	B			11.5974	50.6286	0.70357	0.0336461	0.81912	0.00750303	0.690365	0.0234651	Modellparzelle
5	B			11.5975	50.6286	0.712743	0.0316087	0.823471	0.00612312	0.695859	0.0225005	Modellparzelle
5	B			11.5976	50.6286	0.708781	0.04012	0.818361	0.00644913	0.669108	0.0332467	Modellparzelle
5	B			11.5974	50.6286	0.713767	0.0248844	0.820488	0.00715989	0.682813	0.0257834	Modellparzelle
5	B			11.5975	50.6286	0.715551	0.0265941	0.819413	0.00714649	0.682937	0.0252544	Modellparzelle
5	B			11.5976	50.6286	0.721751	0.0271751	0.820158	0.00651816	0.691455	0.0292065	Modellparzelle
5	B			11.5974	50.6287	0.707965	0.0331665	0.820981	0.0070455	0.695464	0.0185017	Modellparzelle
5	B			11.5975	50.6287	0.719088	0.0212941	0.819211	0.00779057	0.681226	0.025148	Modellparzelle
5	B			11.5976	50.6286	0.723345	0.0211198	0.823803	0.00637163	0.697771	0.0212753	Modellparzelle
5	B			11.5974	50.6287	0.709085	0.0326461	0.81828	0.00721824	0.686804	0.020657	Modellparzelle
5	B			11.5975	50.6287	0.722251	0.0181219	0.818747	0.00652154	0.682244	0.020969	Modellparzelle
5	B			11.5976	50.6287	0.726535	0.0204961	0.826403	0.00573492	0.700374	0.0202323	Modellparzelle
5	B			11.5974	50.6287	0.704971	0.0341038	0.818574	0.00710085	0.684306	0.0325225	Modellparzelle
5	B			11.5975	50.6287	0.719531	0.0215708	0.820222	0.00701239	0.690081	0.0230031	Modellparzelle
5	B			11.5976	50.6287	0.723084	0.0280649	0.82629	0.00750633	0.702494	0.0211447	Modellparzelle
5	B			11.5974	50.6287	0.711807	0.0291554	0.819551	0.00625863	0.704864	0.025638	Modellparzelle
5	B			11.5975	50.6287	0.719759	0.0211996	0.82137	0.00723052	0.685086	0.0256881	Modellparzelle
5	B			11.5976	50.6287	0.724902	0.0336347	0.826095	0.00599115	0.699629	0.0254153	Modellparzelle
5	B			11.5974	50.6287	0.719559	0.0231279	0.824101	0.00584266	0.711465	0.0188842	Modellparzelle
5	B			11.5975	50.6287	0.718233	0.0205182	0.819205	0.00641443	0.682874	0.025789	Modellparzelle
5	B			11.5976	50.6287	0.730783	0.0188705	0.824237	0.00590101	0.6917	0.0237488	Modellparzelle
5	B			11.5974	50.6287	0.724566	0.0211017	0.824046	0.00621849	0.717687	0.0147263	Modellparzelle
5	B			11.5975	50.6287	0.727683	0.0135254	0.821032	0.00552475	0.695149	0.019344	Modellparzelle
5	B			11.5976	50.6287	0.729998	0.0205284	0.824165	0.0053021	0.69982	0.0166961	Modellparzelle
5	B			11.5974	50.6287	0.724332	0.0239212	0.823815	0.00617792	0.716399	0.0151765	Modellparzelle
5	B			11.5975	50.6287	0.716311	0.0331124	0.816161	0.00938261	0.684143	0.021601	Modellparzelle
5	B			11.5976	50.6287	0.729365	0.0198494	0.822055	0.00706451	0.691024	0.0294916	Modellparzelle
5	B			11.5974	50.6288	0.717743	0.0227305	0.820017	0.00660121	0.723201	0.0161405	Modellparzelle
5	B			11.5975	50.6287	0.719062	0.0367353	0.818965	0.00739022	0.691987	0.0266898	Modellparzelle
5	B			11.5976	50.6287	0.729522	0.0185214	0.822719	0.00659441	0.684429	0.0269315	Modellparzelle
5	B			11.5974	50.6288	0.715247	0.0267682	0.819989	0.00703617	0.715938	0.0163612	Modellparzelle
5	B			11.5975	50.6288	0.7144	0.0251861	0.820284	0.00665697	0.698327	0.0201057	Modellparzelle
5	B			11.5976	50.6288	0.724857	0.0253788	0.822607	0.00635632	0.689944	0.0171962	Modellparzelle
5	B			11.5974	50.6288	0.714379	0.0308507	0.819751	0.010048	0.711336	0.0259745	Modellparzelle
5	B			11.5975	50.6288	0.713434	0.031471	0.822275	0.00590528	0.699972	0.0263826	Modellparzelle
5	B			11.5976	50.6288	0.719353	0.0308596	0.820792	0.00729482	0.696853	0.021774	Modellparzelle
5	B			11.5974	50.6288	0.720729	0.025902	0.823804	0.00672538	0.719522	0.0236152	Modellparzelle
5	B			11.5975	50.6288	0.71752	0.0303891	0.82053	0.00587585	0.69552	0.026463	Modellparzelle
5	B			11.5976	50.6288	0.706256	0.0445222	0.821484	0.00648983	0.681391	0.0350865	Modellparzelle
5	B			11.5974	50.6288	0.714507	0.0329653	0.82289	0.00633921	0.724765	0.0211784	Modellparzelle
5	B			11.5975	50.6288	0.718678	0.0307715	0.820144	0.00706189	0.685338	0.0268239	Modellparzelle
5	B			11.5976	50.6288	0.705144	0.0494681	0.819875	0.00660383	0.673284	0.0286124	Modellparzelle
5	B			11.5974	50.6288	0.720673	0.0267446	0.821745	0.00670293	0.714123	0.0321953	Modellparzelle
5	B			11.5975	50.6288	0.727525	0.0224403	0.819409	0.00642488	0.688573	0.0278403	Modellparzelle
5	B			11.5976	50.6288	0.697866	0.0455461	0.819851	0.00622509	0.673755	0.0288824	Modellparzelle
5	B			11.5974	50.6288	0.720752	0.0215073	0.820301	0.00825331	0.710797	0.0273535	Modellparzelle
5	B			11.5975	50.6288	0.726029	0.0212212	0.820866	0.00752433	0.684896	0.0307193	Modellparzelle
5	B			11.5976	50.6288	0.721479	0.0240663	0.819326	0.00662523	0.677781	0.023301	Modellparzelle
5	B			11.5974	50.6289	0.724228	0.0281826	0.820112	0.00677165	0.701984	0.0290768	Modellparzelle
5	B			11.5975	50.6288	0.72359	0.0272587	0.818685	0.00849229	0.682997	0.0252786	Modellparzelle
5	B			11.5976	50.6288	0.711314	0.0332179	0.819349	0.00644734	0.674162	0.0291192	Modellparzelle
5	B			11.5974	50.6289	0.718453	0.0242041	0.821437	0.00689532	0.707868	0.0230883	Modellparzelle
5	B			11.5975	50.6289	0.727528	0.0187528	0.818569	0.00683107	0.668663	0.0336926	Modellparzelle
5	B			11.5976	50.6288	0.72297	0.019609	0.816704	0.00713963	0.656173	0.0342903	Modellparzelle
5	B			11.5974	50.6289	0.712319	0.0296227	0.820977	0.00750992	0.700532	0.0228134	Modellparzelle
5	B			11.5975	50.6289	0.729423	0.0188737	0.818418	0.00662614	0.667035	0.0291195	Modellparzelle
5	B			11.5976	50.6289	0.725471	0.0181935	0.81828	0.00695295	0.655695	0.0319582	Modellparzelle
5	B			11.5974	50.6289	0.70512	0.0455012	0.820644	0.00677391	0.69278	0.0293519	Modellparzelle
5	B			11.5975	50.6289	0.728015	0.0191751	0.818467	0.0062754	0.669496	0.0312802	Modellparzelle
5	B			11.5976	50.6289	0.722301	0.0243155	0.818714	0.00637833	0.6588	0.0235168	Modellparzelle
5	B			11.5974	50.6289	0.708741	0.0466903	0.82042	0.00711978	0.684356	0.0313943	Modellparzelle
5	B			11.5975	50.6289	0.726017	0.0198498	0.815515	0.00684117	0.662725	0.0389531	Modellparzelle
5	B			11.5976	50.6289	0.72232	0.0221797	0.819846	0.00562909	0.662359	0.0219852	Modellparzelle
5	B			11.5974	50.6289	0.713211	0.0329286	0.817554	0.00632169	0.690273	0.0274614	Modellparzelle
5	B			11.5975	50.6289	0.724486	0.0222367	0.816673	0.00756747	0.674314	0.0352689	Modellparzelle
5	B			11.5976	50.6289	0.715833	0.0304868	0.818336	0.00652028	0.665434	0.0321126	Modellparzelle
5	B			11.5974	50.6289	0.720594	0.0175483	0.819088	0.00672726	0.700861	0.0245662	Modellparzelle
5	B			11.5975	50.6289	0.717385	0.0256425	0.817444	0.0067064	0.681098	0.0237415	Modellparzelle
5	B			11.5976	50.6289	0.717518	0.0242054	0.818429	0.00675602	0.667814	0.0470649	Modellparzelle
5	B			11.5974	50.6289	0.698865	0.0519662	0.814448	0.00714419	0.69518	0.0290491	Modellparzelle
5	B			11.5975	50.6289	0.717565	0.0245017	0.813839	0.00830148	0.679317	0.0285045	Modellparzelle
5	B			11.5976	50.6289	0.721451	0.0213218	0.818789	0.00548894	0.671836	0.040611	Modellparzelle
5	B			11.5974	50.629	0.703996	0.0351253	0.813077	0.00738984	0.703365	0.0157879	Modellparzelle
5	B			11.5975	50.629	0.725221	0.0230913	0.816812	0.00629837	0.679629	0.0205231	Modellparzelle
5	B			11.5976	50.6289	0.717949	0.0288059	0.815506	0.00638611	0.669675	0.0390341	Modellparzelle
5	B			11.5974	50.629	0.701792	0.0458823	0.813892	0.00626449	0.70613	0.0163459	Modellparzelle
5	B			11.5975	50.629	0.717909	0.0273701	0.8162	0.00576379	0.676265	0.0188527	Modellparzelle
5	B			11.5976	50.629	0.723082	0.0266779	0.815658	0.00618532	0.686534	0.024938	Modellparzelle
5	B			11.5974	50.629	0.689795	0.0514092	0.815034	0.00651617	0.698943	0.0184793	Modellparzelle
5	B			11.5975	50.629	0.71661	0.0400191	0.814513	0.00751624	0.688831	0.0249509	Modellparzelle
5	B			11.5976	50.629	0.71776	0.0280182	0.817314	0.00604724	0.696134	0.0240082	Modellparzelle
5	B			11.5974	50.629	0.702143	0.0404572	0.8118	0.0102767	0.692823	0.0265612	Modellparzelle
5	B			11.5975	50.629	0.726747	0.0160407	0.818115	0.00623312	0.694616	0.023306	Modellparzelle
5	B			11.5976	50.629	0.722171	0.022399	0.817297	0.00532603	0.694057	0.0288904	Modellparzelle
5	B			11.5974	50.629	0.699258	0.0509628	0.813575	0.00758407	0.69015	0.0331435	Modellparzelle
5	B			11.5975	50.629	0.725678	0.0169749	0.817937	0.00763518	0.705859	0.018307	Modellparzelle
5	B			11.5976	50.629	0.708747	0.0311353	0.818664	0.0060625	0.695526	0.0247522	Modellparzelle
5	B			11.5974	50.629	0.686391	0.0581921	0.814783	0.00774365	0.694186	0.0268065	Modellparzelle
5	B			11.5975	50.629	0.703371	0.0397335	0.816533	0.00694781	0.708844	0.0186749	Modellparzelle
5	B			11.5976	50.629	0.712338	0.0317003	0.818789	0.006155	0.691458	0.0237257	Modellparzelle
5	B			11.5974	50.629	0.672996	0.0661115	0.815358	0.00659689	0.693869	0.0189824	Modellparzelle
5	B			11.5975	50.629	0.707157	0.0360149	0.815589	0.00617846	0.697753	0.0221673	Modellparzelle
5	B			11.5976	50.629	0.69911	0.042791	0.818215	0.00575766	0.706647	0.0167875	Modellparzelle
5	B			11.5974	50.6291	0.658563	0.0802987	0.814767	0.00761315	0.696416	0.028285	Modellparzelle
5	B			11.5975	50.629	0.69991	0.0363704	0.814555	0.00567081	0.697561	0.0212551	Modellparzelle
5	B			11.5976	50.629	0.698687	0.0411895	0.813581	0.00811562	0.689766	0.0201082	Modellparzelle
2	B			11.5972	50.6291	0.733863	0.0150711	0.817641	0.00717618	0.682369	0.0300247	Modellparzelle
2	B			11.5971	50.6291	0.705295	0.0436782	0.817111	0.00667662	0.690774	0.0281941	Modellparzelle
2	B			11.597	50.6291	0.70923	0.0331395	0.819249	0.00648019	0.697697	0.022332	Modellparzelle
2	B			11.5972	50.6291	0.730707	0.0150831	0.818618	0.00619892	0.687993	0.0260207	Modellparzelle
2	B			11.5971	50.6291	0.721257	0.0314449	0.821342	0.00632836	0.691723	0.0372992	Modellparzelle
2	B			11.597	50.6291	0.712262	0.0242462	0.821682	0.00650395	0.710179	0.0239321	Modellparzelle
2	B			11.5972	50.629	0.731957	0.0219989	0.817616	0.00659445	0.677979	0.0293707	Modellparzelle
2	B			11.5971	50.6291	0.725145	0.0273808	0.816378	0.00781428	0.682599	0.0220213	Modellparzelle
2	B			11.597	50.6291	0.709857	0.03832	0.818849	0.00643496	0.7104	0.0223179	Modellparzelle
2	B			11.5972	50.629	0.730552	0.0146825	0.815258	0.00641128	0.676063	0.0325964	Modellparzelle
2	B			11.5971	50.629	0.717991	0.0501656	0.817722	0.00739252	0.680301	0.0344001	Modellparzelle
2	B			11.597	50.629	0.703743	0.0316664	0.819384	0.0065866	0.710859	0.0261812	Modellparzelle
2	B			11.5972	50.629	0.729513	0.0195907	0.812233	0.00745234	0.663245	0.0314567	Modellparzelle
2	B			11.5971	50.629	0.726693	0.0252374	0.817231	0.00862634	0.687558	0.0376329	Modellparzelle
2	B			11.597	50.629	0.70048	0.0604107	0.814281	0.00754958	0.707972	0.0248571	Modellparzelle
2	B			11.5972	50.629	0.735995	0.0111811	0.815012	0.00638451	0.665943	0.0247726	Modellparzelle
2	B			11.5971	50.629	0.720468	0.0375845	0.79929	0.0460404	0.700293	0.0241883	Modellparzelle
2	B			11.597	50.629	0.707063	0.0377708	0.783572	0.0505134	0.67401	0.0459006	Modellparzelle
2	B			11.5972	50.629	0.732522	0.0174861	0.816008	0.00571839	0.674275	0.0172513	Modellparzelle
2	B			11.5971	50.629	0.727076	0.0203475	0.79587	0.0437306	0.689746	0.0211569	Modellparzelle
2	B			11.597	50.629	0.709761	0.0330993	0.733238	0.0970815	0.644019	0.0603354	Modellparzelle
2	B			11.5972	50.629	0.733223	0.0167088	0.816571	0.00559745	0.680699	0.022907	Modellparzelle
2	B			11.5971	50.629	0.72348	0.035505	0.798869	0.0309612	0.682483	0.034257	Modellparzelle
2	B			11.597	50.629	0.708136	0.0347427	0.763665	0.0648739	0.670769	0.0462631	Modellparzelle
2	B			11.5972	50.629	0.732027	0.0133021	0.816482	0.00611105	0.676255	0.0285858	Modellparzelle
2	B			11.5971	50.629	0.721471	0.02945	0.801798	0.0288676	0.672668	0.0422205	Modellparzelle
2	B			11.597	50.629	0.70692	0.0302828	0.750703	0.0738575	0.662756	0.0463824	Modellparzelle
2	B			11.5972	50.6289	0.72845	0.0197779	0.814096	0.00670837	0.670753	0.0412001	Modellparzelle
2	B			11.5971	50.629	0.718653	0.0253306	0.801419	0.0351256	0.677317	0.0331736	Modellparzelle
2	B			11.597	50.629	0.704518	0.0397998	0.771715	0.0518428	0.683564	0.0274485	Modellparzelle
2	B			11.5972	50.6289	0.721273	0.021011	0.814488	0.00635012	0.668645	0.0356289	Modellparzelle
2	B			11.5971	50.6289	0.720859	0.020876	0.815182	0.0178986	0.677502	0.0367403	Modellparzelle
2	B			11.597	50.629	0.707708	0.0337804	0.805973	0.0212577	0.702456	0.0255279	Modellparzelle
2	B			11.5972	50.6289	0.724245	0.0174156	0.815721	0.00597714	0.672871	0.0250951	Modellparzelle
2	B			11.5971	50.6289	0.718567	0.0295847	0.821205	0.00686891	0.68163	0.0359849	Modellparzelle
2	B			11.597	50.6289	0.702942	0.0340811	0.819709	0.00632641	0.718876	0.0164936	Modellparzelle
2	B			11.5972	50.6289	0.72425	0.0176787	0.814481	0.00694613	0.672462	0.0218005	Modellparzelle
2	B			11.5971	50.6289	0.710681	0.0435671	0.818149	0.00622249	0.687751	0.0284293	Modellparzelle
2	B			11.597	50.6289	0.711349	0.020319	0.817812	0.00663935	0.729232	0.0163076	Modellparzelle
2	B			11.5972	50.6289	0.720697	0.0268148	0.817235	0.00695066	0.681533	0.0207205	Modellparzelle
2	B			11.5971	50.6289	0.700044	0.0372258	0.814728	0.0063389	0.68529	0.0240241	Modellparzelle
2	B			11.597	50.6289	0.707368	0.0224918	0.816008	0.00630242	0.714005	0.0248666	Modellparzelle
2	B			11.5972	50.6289	0.721958	0.0237564	0.815887	0.00699736	0.673269	0.0236964	Modellparzelle
2	B			11.5971	50.6289	0.717117	0.0168667	0.813447	0.00841778	0.67314	0.0281711	Modellparzelle
2	B			11.597	50.6289	0.690417	0.0526925	0.817912	0.00691278	0.72016	0.0250261	Modellparzelle
2	B			11.5972	50.6289	0.727947	0.0167226	0.813888	0.00807713	0.658758	0.0397364	Modellparzelle
2	B			11.5971	50.6289	0.708589	0.0291554	0.810598	0.0107443	0.675402	0.0298859	Modellparzelle
2	B			11.597	50.6289	0.700108	0.0456697	0.817944	0.00666792	0.718445	0.0251839	Modellparzelle
2	B			11.5972	50.6289	0.723761	0.0245464	0.816494	0.00644983	0.667827	0.0381398	Modellparzelle
2	B			11.5971	50.6289	0.719309	0.0191754	0.819312	0.00593194	0.670451	0.0260159	Modellparzelle
2	B			11.597	50.6289	0.707706	0.0273188	0.818293	0.00653696	0.709938	0.0235068	Modellparzelle
2	B			11.5972	50.6288	0.72731	0.0162878	0.817095	0.00708137	0.678148	0.0278731	Modellparzelle
2	B			11.5971	50.6288	0.715762	0.0245483	0.819703	0.00738162	0.697064	0.0210917	Modellparzelle
2	B			11.597	50.6289	0.697287	0.0355737	0.816955	0.00639885	0.715239	0.0212693	Modellparzelle
2	B			11.5972	50.6288	0.717567	0.0257896	0.817008	0.00798569	0.680782	0.0258912	Modellparzelle
2	B			11.5971	50.6288	0.7122	0.0416854	0.818907	0.0063266	0.695554	0.0196069	Modellparzelle
2	B			11.597	50.6288	0.706117	0.0281335	0.81566	0.00766544	0.714548	0.020531	Modellparzelle
2	B			11.5972	50.6288	0.71919	0.023807	0.818028	0.00741875	0.693388	0.0281981	Modellparzelle
2	B			11.5971	50.6288	0.725173	0.0142703	0.818947	0.00681605	0.690227	0.0255947	Modellparzelle
2	B			11.597	50.6288	0.705461	0.028275	0.814315	0.00694684	0.713073	0.0246573	Modellparzelle
2	B			11.5972	50.6288	0.721328	0.0202792	0.818318	0.00680064	0.688366	0.031387	Modellparzelle
2	B			11.5971	50.6288	0.712929	0.0232735	0.817437	0.00980147	0.687493	0.0255039	Modellparzelle
2	B			11.597	50.6288	0.699312	0.0249941	0.813247	0.00855207	0.687949	0.0374683	Modellparzelle
2	B			11.5972	50.6288	0.72155	0.0182665	0.819924	0.00788192	0.699458	0.023945	Modellparzelle
2	B			11.5971	50.6288	0.709805	0.045181	0.819021	0.00746689	0.702432	0.0209524	Modellparzelle
2	B			11.597	50.6288	0.704187	0.023391	0.814986	0.00685298	0.678958	0.0334045	Modellparzelle
2	B			11.5972	50.6288	0.719088	0.0289973	0.820497	0.00683424	0.698931	0.0275408	Modellparzelle
2	B			11.5971	50.6288	0.718154	0.0263966	0.820877	0.00845715	0.696023	0.0266471	Modellparzelle
2	B			11.597	50.6288	0.705251	0.0296051	0.816024	0.00927145	0.681396	0.0406841	Modellparzelle
2	B			11.5972	50.6288	0.723014	0.022532	0.820099	0.00668608	0.686883	0.0325097	Modellparzelle
2	B			11.5971	50.6288	0.724509	0.0158989	0.823289	0.00709921	0.698228	0.0233494	Modellparzelle
2	B			11.597	50.6288	0.713205	0.0172103	0.816552	0.00578735	0.687827	0.0260432	Modellparzelle
2	B			11.5972	50.6287	0.729301	0.0178741	0.820119	0.00692095	0.679305	0.0257797	Modellparzelle
2	B			11.5971	50.6288	0.709567	0.0302811	0.819431	0.00678158	0.68268	0.0296098	Modellparzelle
2	B			11.597	50.6288	0.708353	0.020315	0.817459	0.00643963	0.687811	0.0281544	Modellparzelle
2	B			11.5972	50.6287	0.731557	0.0158343	0.820001	0.00772036	0.67561	0.0229599	Modellparzelle
2	B			11.5971	50.6287	0.712919	0.031366	0.819954	0.00789361	0.698728	0.0311183	Modellparzelle
2	B			11.597	50.6287	0.713475	0.0200695	0.816696	0.00752941	0.691571	0.0301756	Modellparzelle
2	B			11.5972	50.6287	0.728654	0.0147837	0.820253	0.00748963	0.67557	0.022907	Modellparzelle
2	B			11.5971	50.6287	0.728013	0.0187066	0.822534	0.00667621	0.706288	0.0277072	Modellparzelle
2	B			11.597	50.6287	0.713287	0.0199704	0.818474	0.00647584	0.689143	0.0262198	Modellparzelle
2	B			11.5972	50.6287	0.725412	0.0283487	0.819298	0.00623262	0.684758	0.0279615	Modellparzelle
2	B			11.5971	50.6287	0.720046	0.0233744	0.822136	0.00683282	0.702538	0.0289757	Modellparzelle
2	B			11.597	50.6287	0.711917	0.0226811	0.82013	0.0068132	0.697208	0.0228273	Modellparzelle
2	B			11.5972	50.6287	0.722722	0.0251339	0.817829	0.0069036	0.681661	0.0237812	Modellparzelle
2	B			11.5971	50.6287	0.715441	0.0287773	0.820516	0.00702087	0.70209	0.0256046	Modellparzelle
2	B			11.597	50.6287	0.70613	0.029717	0.820331	0.00646347	0.696887	0.0222325	Modellparzelle
2	B			11.5972	50.6287	0.728454	0.0175378	0.817712	0.00712538	0.685447	0.0272004	Modellparzelle
2	B			11.5971	50.6287	0.719647	0.0161315	0.818366	0.00738849	0.711162	0.0193199	Modellparzelle
2	B			11.597	50.6287	0.705083	0.022811	0.82166	0.00687549	0.715648	0.0324988	Modellparzelle
2	B			11.5972	50.6287	0.731903	0.0147767	0.817094	0.0071763	0.67746	0.0285627	Modellparzelle
2	B			11.5971	50.6287	0.71489	0.0252865	0.820812	0.00733304	0.707475	0.0225288	Modellparzelle
2	B			11.597	50.6287	0.700887	0.029398	0.82096	0.00731858	0.710949	0.0311245	Modellparzelle
2	B			11.5972	50.6286	0.729093	0.016181	0.818332	0.00668604	0.672542	0.0235071	Modellparzelle
2	B			11.5971	50.6287	0.714249	0.0242049	0.823218	0.00596359	0.710319	0.0238207	Modellparzelle
2	B			11.597	50.6287	0.704706	0.02586	0.820447	0.00565879	0.713684	0.0230076	Modellparzelle
2	B			11.5972	50.6286	0.733597	0.017312	0.817553	0.00716646	0.676951	0.02821	Modellparzelle
2	B			11.5971	50.6286	0.718458	0.0264321	0.824302	0.00625487	0.717859	0.0262152	Modellparzelle
2	B			11.597	50.6287	0.702365	0.0292594	0.819386	0.0059852	0.701671	0.0362142	Modellparzelle
2	B			11.5972	50.6286	0.728088	0.0247713	0.819365	0.00643031	0.675021	0.0282995	Modellparzelle
2	B			11.5971	50.6286	0.717227	0.0377067	0.823128	0.00719762	0.714269	0.0217443	Modellparzelle
2	B			11.597	50.6286	0.699295	0.0371397	0.818164	0.00579854	0.704297	0.0275422	Modellparzelle
2	B			11.5972	50.6286	0.73275	0.0154124	0.820534	0.00628852	0.683912	0.021229	Modellparzelle
2	B			11.5971	50.6286	0.715058	0.0300262	0.823172	0.00665425	0.705276	0.0256064	Modellparzelle
2	B			11.597	50.6286	0.699379	0.0313107	0.816135	0.006766	0.700288	0.0267079	Modellparzelle
2	B			11.5972	50.6286	0.731711	0.0198022	0.817611	0.00850698	0.679645	0.0296596	Modellparzelle
2	B			11.5971	50.6286	0.719382	0.0214305	0.821655	0.00599349	0.719242	0.0248003	Modellparzelle
2	B			11.597	50.6286	0.706193	0.0254097	0.817901	0.00663235	0.701238	0.0239138	Modellparzelle
2	B			11.5972	50.6286	0.732798	0.01346	0.817178	0.00681137	0.693391	0.0232179	Modellparzelle
2	B			11.5971	50.6286	0.718014	0.0174144	0.820467	0.00613017	0.715864	0.0236543	Modellparzelle
2	B			11.597	50.6286	0.701769	0.0309992	0.819927	0.010128	0.706439	0.0284914	Modellparzelle
2	B			11.5972	50.6286	0.72695	0.0206014	0.814062	0.00803663	0.676027	0.0207898	Modellparzelle
2	B			11.5971	50.6286	0.714552	0.0329023	0.822746	0.00720004	0.725441	0.0230036	Modellparzelle
2	B			11.597	50.6286	0.705685	0.02332	0.819672	0.00816502	0.710055	0.0253245	Modellparzelle
2	B			11.5972	50.6286	0.729622	0.0151481	0.815454	0.00769426	0.684768	0.0253766	Modellparzelle
2	B			11.5971	50.6286	0.717557	0.0222593	0.821251	0.00659942	0.710516	0.0323424	Modellparzelle
2	B			11.597	50.6286	0.701223	0.0372319	0.818451	0.0079041	0.706092	0.0223154	Modellparzelle
2	B			11.5972	50.6285	0.728895	0.0193544	0.816932	0.00894481	0.677813	0.0271626	Modellparzelle
2	B			11.5971	50.6286	0.720861	0.0150478	0.819402	0.00789833	0.708171	0.029811	Modellparzelle
2	B			11.597	50.6286	0.710158	0.0238575	0.814174	0.00713722	0.695367	0.0196483	Modellparzelle
2	B			11.5972	50.6285	0.724407	0.0253667	0.818406	0.00682989	0.690865	0.0250691	Modellparzelle
2	B			11.5971	50.6285	0.711212	0.0255208	0.820706	0.00727386	0.707827	0.02205	Modellparzelle
2	B			11.597	50.6285	0.708017	0.0205587	0.814401	0.00722574	0.685138	0.0279087	Modellparzelle
2	B			11.5972	50.6285	0.728421	0.0158193	0.818739	0.00739158	0.67842	0.0307018	Modellparzelle
2	B			11.5971	50.6285	0.71646	0.0195024	0.820996	0.00622375	0.71133	0.0284248	Modellparzelle
2	B			11.597	50.6285	0.696959	0.0267797	0.811844	0.00915085	0.686129	0.0266134	Modellparzelle
2	B			11.5972	50.6285	0.727281	0.0222505	0.821389	0.006473	0.683528	0.024928	Modellparzelle
2	B			11.5971	50.6285	0.710553	0.0297082	0.819743	0.00687957	0.712472	0.0188566	Modellparzelle
2	B			11.597	50.6285	0.707218	0.0199012	0.818208	0.00785464	0.702479	0.02616	Modellparzelle
2	B			11.5972	50.6285	0.73497	0.0117784	0.82068	0.0064717	0.678064	0.0286848	Modellparzelle
2	B			11.5971	50.6285	0.710729	0.0345046	0.818362	0.00581555	0.705035	0.0191816	Modellparzelle
2	B			11.597	50.6285	0.703559	0.0382066	0.820186	0.00686727	0.702139	0.0230925	Modellparzelle
2	B			11.5972	50.6285	0.728142	0.017265	0.817245	0.00927252	0.673205	0.0439338	Modellparzelle
2	B			11.5971	50.6285	0.709619	0.0270021	0.821319	0.0074649	0.703821	0.0270094	Modellparzelle
2	B			11.597	50.6285	0.710126	0.0272636	0.821897	0.00773135	0.694134	0.0274271	Modellparzelle
2	B			11.5972	50.6285	0.731275	0.0138583	0.821779	0.00753252	0.674534	0.0342474	Modellparzelle
2	B			11.5971	50.6285	0.719719	0.028016	0.822063	0.00711243	0.714567	0.0304886	Modellparzelle
2	B			11.597	50.6285	0.711142	0.0214294	0.819458	0.00862008	0.699187	0.0235097	Modellparzelle
2	B			11.5972	50.6284	0.73034	0.0175201	0.825435	0.00618594	0.696545	0.0260964	Modellparzelle
2	B			11.5971	50.6285	0.71052	0.0425904	0.820088	0.00757751	0.716522	0.023717	Modellparzelle
2	B			11.597	50.6285	0.712356	0.0211312	0.820685	0.00892074	0.706539	0.0258725	Modellparzelle
2	B			11.5972	50.6284	0.733992	0.0174744	0.82377	0.00736794	0.690936	0.0267444	Modellparzelle
2	B			11.5971	50.6284	0.722253	0.03623	0.818862	0.00925614	0.713565	0.028636	Modellparzelle
2	B			11.597	50.6285	0.712408	0.0250369	0.823483	0.00718816	0.718679	0.024758	Modellparzelle
2	B			11.5972	50.6284	0.733208	0.0152533	0.820875	0.00741571	0.680619	0.0229184	Modellparzelle
2	B			11.5971	50.6284	0.721938	0.0390485	0.82149	0.00836711	0.714472	0.0303689	Modellparzelle
2	B			11.597	50.6284	0.719405	0.0174809	0.823631	0.00655691	0.712817	0.0242933	Modellparzelle
2	B			11.5972	50.6284	0.731735	0.0165524	0.821824	0.00615254	0.674581	0.025936	Modellparzelle
2	B			11.5971	50.6284	0.726854	0.0176397	0.823694	0.00693091	0.720442	0.027273	Modellparzelle
2	B			11.5969	50.6284	0.720265	0.0211953	0.825233	0.00557688	0.706389	0.0222077	Modellparzelle
2	B			11.5972	50.6284	0.727561	0.0229717	0.822602	0.00688043	0.687985	0.030846	Modellparzelle
2	B			11.5971	50.6284	0.711262	0.0365537	0.823428	0.00701941	0.71093	0.0277559	Modellparzelle
2	B			11.5969	50.6284	0.714026	0.0214236	0.822723	0.00611658	0.710545	0.0171025	Modellparzelle
2	B			11.5972	50.6284	0.730009	0.0165533	0.820462	0.00741621	0.677313	0.0209423	Modellparzelle
2	B			11.5971	50.6284	0.725221	0.0216611	0.82451	0.00574298	0.711362	0.0177076	Modellparzelle
2	B			11.5969	50.6284	0.71356	0.0248321	0.821347	0.00671982	0.705801	0.0177289	Modellparzelle
2	B			11.5972	50.6284	0.727259	0.0188106	0.821502	0.00615841	0.681833	0.0220148	Modellparzelle
2	B			11.5971	50.6284	0.719822	0.024241	0.822938	0.00602318	0.70405	0.0200472	Modellparzelle
2	B			11.5969	50.6284	0.706658	0.0355118	0.821891	0.00722253	0.70183	0.018443	Modellparzelle
2	B			11.5972	50.6284	0.729745	0.0185529	0.822156	0.00547927	0.690767	0.0259416	Modellparzelle
2	B			11.597	50.6284	0.726451	0.0188485	0.822751	0.00534477	0.702928	0.0237473	Modellparzelle
2	B			11.5969	50.6284	0.71171	0.0369804	0.825062	0.00696131	0.715149	0.0157735	Modellparzelle
2	B			11.5972	50.6283	0.726938	0.0163236	0.819482	0.00718829	0.673187	0.0300518	Modellparzelle
2	B			11.597	50.6283	0.723608	0.0256406	0.821425	0.00640959	0.701241	0.0302903	Modellparzelle
2	B			11.5969	50.6284	0.700937	0.0384568	0.826877	0.00654292	0.726267	0.0191053	Modellparzelle
2	B			11.5972	50.6283	0.727681	0.0154099	0.818798	0.00660803	0.692296	0.0202254	Modellparzelle
2	B			11.597	50.6283	0.721451	0.031882	0.822192	0.00593898	0.707589	0.0184939	Modellparzelle
2	B			11.5969	50.6283	0.722027	0.0198148	0.826324	0.00600945	0.716778	0.0204643	Modellparzelle
2	B			11.5972	50.6283	0.729158	0.0169634	0.81859	0.00578451	0.68844	0.0285529	Modellparzelle
2	B			11.597	50.6283	0.724631	0.0178234	0.82247	0.00643933	0.701276	0.0291548	Modellparzelle
2	B			11.5969	50.6283	0.723436	0.0162213	0.825378	0.005636	0.715154	0.021543	Modellparzelle
2	B			11.5971	50.6283	0.726798	0.0160678	0.819835	0.00594626	0.682799	0.0298422	Modellparzelle
2	B			11.597	50.6283	0.726393	0.0213223	0.822317	0.00643925	0.716749	0.0207949	Modellparzelle
2	B			11.5969	50.6283	0.724132	0.0176283	0.823374	0.00672194	0.723364	0.0222687	Modellparzelle
2	B			11.5971	50.6283	0.729358	0.0156125	0.821779	0.00616756	0.694264	0.0304958	Modellparzelle
2	B			11.597	50.6283	0.731444	0.012049	0.821166	0.00631907	0.714988	0.0258166	Modellparzelle
2	B			11.5969	50.6283	0.723836	0.0159805	0.823083	0.00618296	0.719283	0.0176071	Modellparzelle
2	B			11.5971	50.6283	0.733459	0.0128842	0.821045	0.00649856	0.698314	0.0271082	Modellparzelle
2	B			11.597	50.6283	0.716662	0.0262109	0.820062	0.00760174	0.707931	0.0297154	Modellparzelle
2	B			11.5969	50.6283	0.725248	0.0149315	0.824709	0.00662902	0.721567	0.0207224	Modellparzelle
2	B			11.5971	50.6283	0.734444	0.0137993	0.819179	0.00880071	0.688235	0.0372033	Modellparzelle
2	B			11.597	50.6283	0.716362	0.0386252	0.819054	0.00801796	0.709221	0.0253834	Modellparzelle
2	B			11.5969	50.6283	0.711349	0.0228402	0.821426	0.00706627	0.709999	0.0181119	Modellparzelle
2	B			11.5971	50.6282	0.734141	0.0165644	0.823812	0.00781249	0.701848	0.0325319	Modellparzelle
2	B			11.597	50.6283	0.7206	0.033156	0.820692	0.00923668	0.713751	0.0377286	Modellparzelle
2	B			11.5969	50.6283	0.696223	0.0335269	0.817089	0.00726055	0.707909	0.0181453	Modellparzelle
2	B			11.5971	50.6282	0.733262	0.0173961	0.823055	0.00692071	0.702038	0.0295324	Modellparzelle
2	B			11.597	50.6282	0.722409	0.0200582	0.821997	0.00786048	0.722822	0.0226328	Modellparzelle
2	B			11.5969	50.6283	0.701938	0.0267696	0.817532	0.00863597	0.712879	0.0174958	Modellparzelle
2	B			11.5971	50.6282	0.725372	0.0180356	0.820307	0.00762794	0.692706	0.0332195	Modellparzelle
2	B			11.597	50.6282	0.719001	0.0225006	0.820022	0.00625499	0.710885	0.0191248	Modellparzelle
2	B			11.5969	50.6282	0.698684	0.0305938	0.8173	0.00856678	0.714474	0.0196199	Modellparzelle
2	B			11.5971	50.6282	0.735654	0.0163565	0.820021	0.00978863	0.694277	0.0334114	Modellparzelle
2	B			11.597	50.6282	0.706656	0.0384033	0.819893	0.00723006	0.71077	0.0252219	Modellparzelle
2	B			11.5969	50.6282	0.698908	0.0323846	0.816801	0.00826144	0.722423	0.0194879	Modellparzelle
2	B			11.5971	50.6282	0.734862	0.0181308	0.814837	0.0109145	0.681956	0.0411819	Modellparzelle
2	B			11.597	50.6282	0.709006	0.0296829	0.819044	0.00646944	0.702168	0.0376867	Modellparzelle
2	B			11.5969	50.6282	0.694341	0.02414	0.816209	0.007935	0.727498	0.0178806	Modellparzelle
2	B			11.5971	50.6282	0.733675	0.016247	0.822304	0.00690472	0.667725	0.0325885	Modellparzelle
2	B			11.597	50.6282	0.7115	0.0309433	0.816853	0.00740603	0.697842	0.030415	Modellparzelle
2	B			11.5969	50.6282	0.69385	0.0293112	0.81224	0.0108429	0.707598	0.0190781	Modellparzelle
2	B			11.5971	50.6282	0.735792	0.0149174	0.820103	0.00636653	0.668473	0.0271163	Modellparzelle
2	B			11.597	50.6282	0.706059	0.0347975	0.816509	0.00681866	0.710793	0.0246421	Modellparzelle
2	B			11.5969	50.6282	0.699487	0.0298311	0.814046	0.00984188	0.712418	0.0175058	Modellparzelle
2	B			11.5971	50.6282	0.732356	0.0152069	0.816431	0.00770454	0.663435	0.0293974	Modellparzelle
2	B			11.597	50.6282	0.706252	0.0297915	0.813536	0.00776084	0.709634	0.0192992	Modellparzelle
2	B			11.5969	50.6282	0.699628	0.0199809	0.813074	0.00850143	0.711453	0.0216736	Modellparzelle
2	B			11.5971	50.6281	0.729729	0.0180772	0.817427	0.00574544	0.671024	0.0387562	Modellparzelle
2	B			11.597	50.6281	0.708811	0.0314681	0.81337	0.00640306	0.692273	0.0309087	Modellparzelle
2	B			11.5969	50.6282	0.699583	0.0239536	0.813377	0.00750703	0.716421	0.0168994	Modellparzelle
2	B			11.5971	50.6281	0.72856	0.0154792	0.813542	0.00653893	0.663704	0.0374031	Modellparzelle
2	B			11.597	50.6281	0.709766	0.0371972	0.817203	0.00635056	0.70229	0.0333074	Modellparzelle
2	B			11.5969	50.6281	0.698163	0.0263003	0.816226	0.00805501	0.708818	0.0222116	Modellparzelle
2	B			11.5971	50.6281	0.717976	0.0266198	0.816473	0.00640583	0.695078	0.03001	Modellparzelle
2	B			11.597	50.6281	0.706424	0.0364315	0.820155	0.00699521	0.714169	0.0198661	Modellparzelle
2	B			11.5969	50.6281	0.70306	0.0253604	0.81573	0.00781941	0.706435	0.0181252	Modellparzelle
2	B			11.5971	50.6281	0.717265	0.0195408	0.812011	0.00736965	0.690173	0.0224239	Modellparzelle
2	B			11.597	50.6281	0.716371	0.0280959	0.820998	0.00624592	0.704895	0.0262634	Modellparzelle
2	B			11.5969	50.6281	0.69533	0.039091	0.816203	0.00747503	0.690198	0.0204452	Modellparzelle
2	B			11.5971	50.6281	0.71068	0.0278952	0.812467	0.00668853	0.701899	0.0254623	Modellparzelle
2	B			11.597	50.6281	0.717905	0.0219667	0.823242	0.00561008	0.698642	0.0216633	Modellparzelle
2	B			11.5969	50.6281	0.673623	0.0734996	0.816654	0.00737449	0.699643	0.0232132	Modellparzelle
2	B			11.5971	50.6281	0.675346	0.0954138	0.81275	0.00751623	0.685361	0.0253009	Modellparzelle
2	B			11.597	50.6281	0.721366	0.0236962	0.821853	0.0070766	0.698456	0.0220197	Modellparzelle
2	B			11.5969	50.6281	0.68103	0.0472275	0.817946	0.00892867	0.706088	0.0235336	Modellparzelle
2	B			11.5971	50.6281	0.54933	0.195029	0.808803	0.0147296	0.670236	0.0270182	Modellparzelle
2	B			11.597	50.6281	0.72336	0.0231201	0.819251	0.00733092	0.708034	0.0188939	Modellparzelle
2	B			11.5969	50.6281	0.69245	0.040279	0.819362	0.00780681	0.706922	0.0248423	Modellparzelle
2	B			11.5971	50.628	0.453618	0.271579	0.796586	0.0224045	0.660632	0.0331394	Modellparzelle
2	B			11.597	50.6281	0.715912	0.0296386	0.820298	0.00705311	0.705241	0.0266853	Modellparzelle
2	B			11.5969	50.6281	0.706172	0.0247673	0.819872	0.00561947	0.712468	0.0242037	Modellparzelle
2	B			11.5971	50.628	0.418714	0.28717	0.799921	0.0184538	0.664685	0.0294574	Modellparzelle
2	B			11.597	50.628	0.711146	0.037399	0.820269	0.00647376	0.716333	0.0215381	Modellparzelle
2	B			11.5969	50.6281	0.695519	0.0269783	0.815853	0.00852991	0.709405	0.0213314	Modellparzelle
2	B			11.5971	50.628	0.605567	0.147609	0.802095	0.0197456	0.663068	0.0278827	Modellparzelle
2	B			11.597	50.628	0.703077	0.0332451	0.818733	0.00790264	0.725497	0.0275388	Modellparzelle
2	B			11.5969	50.628	0.69523	0.0268218	0.816926	0.00654224	0.705608	0.0230432	Modellparzelle
2	B			11.5971	50.628	0.709907	0.0315076	0.810095	0.00834317	0.6761	0.0271398	Modellparzelle
2	B			11.597	50.628	0.690399	0.0384143	0.816563	0.00624472	0.71853	0.0249876	Modellparzelle
2	B			11.5969	50.628	0.69422	0.0337084	0.818488	0.00749744	0.718671	0.0148521	Modellparzelle
2	B			11.5971	50.628	0.703467	0.0342805	0.805719	0.0112475	0.670597	0.0219385	Modellparzelle
2	B			11.597	50.628	0.69517	0.0307048	0.812812	0.00646636	0.711498	0.0233312	Modellparzelle
2	B			11.5969	50.628	0.68389	0.0323133	0.812253	0.00860103	0.714127	0.0170769	Modellparzelle
2	B			11.5971	50.628	0.709034	0.0201898	0.805144	0.0071997	0.671551	0.0232122	Modellparzelle
2	B			11.597	50.628	0.684004	0.0472508	0.811175	0.00685842	0.702761	0.0251026	Modellparzelle
2	B			11.5969	50.628	0.699223	0.0276887	0.810239	0.0108403	0.711226	0.0155596	Modellparzelle
2	B			11.5971	50.628	0.695089	0.0282595	0.800007	0.00785974	0.674463	0.0260499	Modellparzelle
2	B			11.597	50.628	0.673836	0.0636321	0.812262	0.00783902	0.693581	0.0387034	Modellparzelle
2	B			11.5969	50.628	0.700132	0.0297531	0.812776	0.0111234	0.703193	0.0251304	Modellparzelle
2	B			11.5971	50.628	0.689984	0.0357183	0.800388	0.00829999	0.671583	0.0280437	Modellparzelle
2	B			11.597	50.628	0.68998	0.0482132	0.810385	0.0101883	0.690575	0.0296114	Modellparzelle
2	B			11.5969	50.628	0.703653	0.032762	0.811013	0.0108978	0.704207	0.0196326	Modellparzelle
2	B			11.5971	50.6279	0.681555	0.048247	0.79936	0.00942502	0.662385	0.0335303	Modellparzelle
2	B			11.597	50.6279	0.692915	0.0429394	0.815475	0.00686573	0.704818	0.021448	Modellparzelle
2	B			11.5968	50.628	0.68554	0.0412131	0.805225	0.00934257	0.705983	0.0231923	Modellparzelle
2	B			11.5971	50.6279	0.69014	0.0468524	0.803409	0.00961774	0.665824	0.0282768	Modellparzelle
2	B			11.597	50.6279	0.697753	0.0269627	0.815872	0.00745201	0.699984	0.0220226	Modellparzelle
2	B			11.5968	50.6279	0.690707	0.0308353	0.801197	0.00904215	0.698031	0.0206701	Modellparzelle
2	B			11.5971	50.6279	0.702539	0.0356146	0.805987	0.00912704	0.66732	0.0241074	Modellparzelle
2	B			11.5969	50.6279	0.702253	0.0331628	0.817358	0.00772095	0.705581	0.0228098	Modellparzelle
2	B			11.5968	50.6279	0.682273	0.0325137	0.803584	0.00842131	0.693765	0.0190882	Modellparzelle
2	B			11.597	50.6279	0.713291	0.0258486	0.809496	0.00775421	0.670317	0.0263786	Modellparzelle
2	B			11.5969	50.6279	0.69878	0.0378898	0.815464	0.00706649	0.699092	0.0212061	Modellparzelle
2	B			11.5968	50.6279	0.687073	0.0309698	0.8076	0.0100589	0.691092	0.0277571	Modellparzelle
2	B			11.597	50.6279	0.709382	0.0347816	0.811038	0.00644007	0.687197	0.0241054	Modellparzelle
2	B			11.5969	50.6279	0.690947	0.0474955	0.815613	0.00745581	0.703795	0.0213702	Modellparzelle
2	B			11.5968	50.6279	0.696936	0.0266072	0.810252	0.00683231	0.700429	0.0237612	Modellparzelle
2	B			11.597	50.6279	0.67746	0.0867188	0.808747	0.00628974	0.676273	0.0236718	Modellparzelle
2	B			11.5969	50.6279	0.672349	0.0808936	0.817664	0.00575158	0.695702	0.0193559	Modellparzelle
2	B			11.5968	50.6279	0.697927	0.0264949	0.813932	0.00604438	0.72298	0.0213965	Modellparzelle
2	B			11.597	50.6279	0.690859	0.0500723	0.81002	0.00662461	0.678081	0.0273056	Modellparzelle
2	B			11.5969	50.6279	0.67827	0.0636449	0.815829	0.00676433	0.708582	0.0284921	Modellparzelle
2	B			11.5968	50.6279	0.683754	0.0390986	0.808619	0.0069212	0.719321	0.0223252	Modellparzelle
2	B			11.597	50.6278	0.707249	0.029331	0.80736	0.00675384	0.684048	0.0228565	Modellparzelle
2	B			11.5969	50.6279	0.701007	0.0353995	0.81635	0.00703865	0.709731	0.0390688	Modellparzelle
2	B			11.5968	50.6279	0.67589	0.0377736	0.805833	0.0074484	0.71102	0.027168	Modellparzelle
2	B			11.597	50.6278	0.699886	0.036622	0.808186	0.00704461	0.686754	0.0172869	Modellparzelle
2	B			11.5969	50.6278	0.697025	0.0428601	0.815107	0.00539447	0.70511	0.0337256	Modellparzelle
2	B			11.5968	50.6279	0.680232	0.0341156	0.802374	0.00816937	0.706725	0.0257097	Modellparzelle
2	B			11.597	50.6278	0.711927	0.0199288	0.808814	0.00709733	0.691753	0.0232116	Modellparzelle
2	B			11.5969	50.6278	0.690205	0.0404369	0.817273	0.00569345	0.718074	0.0248013	Modellparzelle
2	B			11.5968	50.6278	0.689744	0.031463	0.806963	0.00809202	0.721647	0.0160829	Modellparzelle
2	B			11.597	50.6278	0.719493	0.0208178	0.814571	0.00652991	0.701912	0.018286	Modellparzelle
2	B			11.5969	50.6278	0.664959	0.0629497	0.809954	0.00629261	0.702627	0.0263583	Modellparzelle
2	B			11.5968	50.6278	0.687004	0.0307957	0.80415	0.00851377	0.704052	0.0214315	Modellparzelle
2	B			11.597	50.6278	0.718147	0.024204	0.815892	0.00678803	0.705146	0.0193998	Modellparzelle
2	B			11.5969	50.6278	0.671272	0.0718791	0.810373	0.00855493	0.714544	0.0221146	Modellparzelle
2	B			11.5968	50.6278	0.696145	0.0331533	0.808277	0.00814242	0.713171	0.0173149	Modellparzelle
2	B			11.597	50.6278	0.710749	0.0206148	0.814568	0.00658766	0.70737	0.0185173	Modellparzelle
2	B			11.5969	50.6278	0.692612	0.0381626	0.810808	0.00815817	0.711837	0.0241573	Modellparzelle
2	B			11.5968	50.6278	0.695657	0.0308905	0.807335	0.00889373	0.690292	0.0216454	Modellparzelle
2	B			11.597	50.6278	0.711496	0.0214732	0.81348	0.00640213	0.70355	0.0150687	Modellparzelle
2	B			11.5969	50.6278	0.706138	0.0297854	0.81203	0.00867906	0.711007	0.0248019	Modellparzelle
2	B			11.5968	50.6278	0.691109	0.0358502	0.804167	0.00889204	0.691164	0.0214268	Modellparzelle
2	B			11.597	50.6278	0.715682	0.0209446	0.814077	0.00553933	0.698162	0.0217849	Modellparzelle
2	B			11.5969	50.6278	0.704498	0.0366586	0.81125	0.00837007	0.698823	0.0292671	Modellparzelle
2	B			11.5968	50.6278	0.675786	0.0441421	0.798312	0.0111681	0.691171	0.0260621	Modellparzelle
2	B			11.597	50.6277	0.714416	0.0248478	0.817029	0.00576135	0.690518	0.0216781	Modellparzelle
2	B			11.5969	50.6277	0.708244	0.0330222	0.814272	0.0095796	0.695444	0.0358855	Modellparzelle
2	B			11.5968	50.6278	0.676966	0.0541209	0.805166	0.00882066	0.689227	0.0226946	Modellparzelle
2	B			11.597	50.6277	0.72834	0.0127223	0.818985	0.00687679	0.687932	0.0303633	Modellparzelle
2	B			11.5969	50.6277	0.717104	0.0308188	0.816712	0.00759612	0.709836	0.0240523	Modellparzelle
2	B			11.5968	50.6277	0.686546	0.0332828	0.804017	0.00694761	0.683599	0.0285531	Modellparzelle
2	B			11.597	50.6277	0.719843	0.0204611	0.818335	0.00677915	0.687893	0.0263292	Modellparzelle
2	B			11.5969	50.6277	0.702094	0.0485678	0.816638	0.00620073	0.704851	0.0269736	Modellparzelle
2	B			11.5968	50.6277	0.688054	0.0355134	0.807191	0.00610015	0.686921	0.0276797	Modellparzelle
2	B			11.597	50.6277	0.722768	0.0157244	0.815039	0.00638785	0.699476	0.0264871	Modellparzelle
2	B			11.5969	50.6277	0.682347	0.0499614	0.81284	0.00549084	0.700997	0.0293756	Modellparzelle
2	B			11.5968	50.6277	0.690523	0.0418582	0.805643	0.00691521	0.684058	0.0242656	Modellparzelle
2	B			11.597	50.6277	0.721319	0.0189839	0.817086	0.00659909	0.706675	0.0243388	Modellparzelle
2	B			11.5969	50.6277	0.679404	0.0641681	0.813098	0.0065699	0.708786	0.0304524	Modellparzelle
2	B			11.5968	50.6277	0.706051	0.0239338	0.8095	0.00600179	0.692421	0.0185174	Modellparzelle
2	B			11.597	50.6277	0.729584	0.00926834	0.822006	0.00635492	0.712785	0.0202271	Modellparzelle
2	B			11.5969	50.6277	0.691593	0.0559803	0.815347	0.00625762	0.704797	0.0289163	Modellparzelle
2	B			11.5968	50.6277	0.702907	0.0337099	0.808182	0.00790489	0.68972	0.024444	Modellparzelle
2	B			11.597	50.6277	0.72341	0.0229041	0.822503	0.00577335	0.711994	0.0260349	Modellparzelle
2	B			11.5969	50.6277	0.696613	0.0472385	0.818287	0.00748316	0.713024	0.0295462	Modellparzelle
2	B			11.5968	50.6277	0.698983	0.0314503	0.810306	0.00641468	0.712517	0.0174614	Modellparzelle
2	B			11.597	50.6276	0.722573	0.0195795	0.819842	0.00660537	0.702352	0.0203399	Modellparzelle
2	B			11.5969	50.6277	0.692493	0.04482	0.816327	0.00678381	0.70777	0.0253577	Modellparzelle
2	B			11.5968	50.6277	0.692759	0.0284199	0.805523	0.0063452	0.696807	0.0189333	Modellparzelle
2	B			11.597	50.6276	0.720512	0.0208349	0.81718	0.00689113	0.697053	0.0295537	Modellparzelle
2	B			11.5969	50.6276	0.70364	0.0319614	0.814863	0.00744537	0.706218	0.022955	Modellparzelle
2	B			11.5968	50.6277	0.684276	0.0353047	0.803614	0.00731738	0.692142	0.0196528	Modellparzelle
2	B			11.597	50.6276	0.714709	0.0277317	0.813032	0.00709267	0.690274	0.0259428	Modellparzelle
2	B			11.5969	50.6276	0.676946	0.0448034	0.814109	0.00715065	0.70368	0.0255703	Modellparzelle
2	B			11.5967	50.6276	0.687531	0.0280622	0.800517	0.00708658	0.683437	0.0228568	Modellparzelle
2	B			11.597	50.6276	0.689384	0.0450169	0.80851	0.00816952	0.674695	0.0305546	Modellparzelle
2	B			11.5969	50.6276	0.658934	0.0617479	0.808551	0.00743016	0.68626	0.0328098	Modellparzelle
2	B			11.5967	50.6276	0.681323	0.0386773	0.7983	0.00809623	0.681706	0.0321383	Modellparzelle
2	B			11.597	50.6276	0.648467	0.0636421	0.804104	0.00957979	0.660337	0.0405154	Modellparzelle
2	B			11.5968	50.6276	0.648324	0.0791704	0.80663	0.00788822	0.678724	0.0353277	Modellparzelle
2	B			11.5967	50.6276	0.677091	0.0437882	0.797054	0.00898204	0.667725	0.0374853	Modellparzelle
4	B			11.5967	50.6279	0.703928	0.0314153	0.821509	0.00582648	0.734887	0.0219783	Modellparzelle
4	B			11.5966	50.628	0.716255	0.0281094	0.817435	0.00601775	0.728844	0.0203999	Modellparzelle
4	B			11.5965	50.628	0.721948	0.0206083	0.817406	0.00605759	0.711331	0.0253571	Modellparzelle
4	B			11.5967	50.6279	0.700421	0.0323319	0.819311	0.00538014	0.742171	0.0156121	Modellparzelle
4	B			11.5966	50.6279	0.721139	0.0330679	0.813842	0.00923351	0.712288	0.0302652	Modellparzelle
4	B			11.5965	50.6279	0.721769	0.0193593	0.816438	0.00732238	0.711088	0.0390838	Modellparzelle
4	B			11.5967	50.6279	0.70445	0.0429916	0.822272	0.00477617	0.734533	0.0176994	Modellparzelle
4	B			11.5966	50.6279	0.728382	0.0232377	0.818599	0.00660202	0.709035	0.0242032	Modellparzelle
4	B			11.5965	50.6279	0.711835	0.0273479	0.816691	0.00785748	0.712619	0.0241671	Modellparzelle
4	B			11.5967	50.6279	0.712161	0.0306245	0.821669	0.00609615	0.719787	0.0178628	Modellparzelle
4	B			11.5966	50.6279	0.727873	0.0234897	0.817869	0.00706861	0.705594	0.0222154	Modellparzelle
4	B			11.5965	50.6279	0.709488	0.0400239	0.817804	0.00763186	0.71873	0.0216635	Modellparzelle
4	B			11.5967	50.6279	0.715234	0.0327859	0.81961	0.00617748	0.703597	0.0161465	Modellparzelle
4	B			11.5966	50.6279	0.720906	0.0269663	0.815423	0.00594073	0.71495	0.0200616	Modellparzelle
4	B			11.5965	50.6279	0.710711	0.030121	0.817205	0.00784331	0.719347	0.0174847	Modellparzelle
4	B			11.5967	50.6279	0.716201	0.0279636	0.817386	0.00536605	0.70726	0.0162826	Modellparzelle
4	B			11.5966	50.6279	0.676628	0.0498637	0.815213	0.00523942	0.728396	0.0146742	Modellparzelle
4	B			11.5965	50.6279	0.71873	0.0249457	0.813965	0.00755384	0.712872	0.0234336	Modellparzelle
4	B			11.5967	50.6279	0.711696	0.0360975	0.814851	0.00719914	0.721318	0.0150137	Modellparzelle
4	B			11.5966	50.6279	0.682053	0.0752539	0.810369	0.00559954	0.712131	0.0185508	Modellparzelle
4	B			11.5965	50.6279	0.716007	0.0224463	0.815254	0.00709916	0.711714	0.0170417	Modellparzelle
4	B			11.5967	50.6279	0.703578	0.0325746	0.809915	0.00642642	0.714873	0.0167029	Modellparzelle
4	B			11.5966	50.6279	0.699521	0.0276693	0.811965	0.00702096	0.712908	0.0213073	Modellparzelle
4	B			11.5964	50.6279	0.705334	0.0331179	0.819334	0.00630144	0.723758	0.0185254	Modellparzelle
4	B			11.5967	50.6278	0.689545	0.0365296	0.81114	0.00757803	0.719284	0.01912	Modellparzelle
4	B			11.5965	50.6278	0.692572	0.0388649	0.810719	0.0060877	0.707493	0.020031	Modellparzelle
4	B			11.5964	50.6279	0.707858	0.0271171	0.816344	0.00613068	0.719026	0.0169657	Modellparzelle
4	B			11.5966	50.6278	0.703766	0.0310416	0.810665	0.00655972	0.717499	0.016602	Modellparzelle
4	B			11.5965	50.6278	0.691211	0.0483884	0.811261	0.00533972	0.712116	0.0168396	Modellparzelle
4	B			11.5964	50.6278	0.705648	0.0300735	0.813217	0.00628293	0.712625	0.0154498	Modellparzelle
4	B			11.5966	50.6278	0.699138	0.0315642	0.810888	0.00677729	0.716401	0.0207546	Modellparzelle
4	B			11.5965	50.6278	0.692594	0.0512004	0.812384	0.00599442	0.710247	0.0197214	Modellparzelle
4	B			11.5964	50.6278	0.700451	0.0258251	0.812151	0.00610968	0.711026	0.0129996	Modellparzelle
4	B			11.5966	50.6278	0.706237	0.0295145	0.810957	0.00672287	0.703605	0.0205663	Modellparzelle
4	B			11.5965	50.6278	0.712821	0.0275764	0.809596	0.00893343	0.699961	0.0184112	Modellparzelle
4	B			11.5964	50.6278	0.709413	0.0203348	0.810183	0.00755259	0.711762	0.0151868	Modellparzelle
4	B			11.5966	50.6278	0.711252	0.035388	0.810459	0.00559556	0.702742	0.0195762	Modellparzelle
4	B			11.5965	50.6278	0.705937	0.0404597	0.809392	0.00509075	0.705293	0.0194367	Modellparzelle
4	B			11.5964	50.6278	0.712454	0.0204307	0.809801	0.00689381	0.711109	0.0163287	Modellparzelle
4	B			11.5966	50.6278	0.721511	0.0183292	0.812141	0.00599578	0.700616	0.022953	Modellparzelle
4	B			11.5965	50.6278	0.699071	0.0360911	0.810591	0.00473792	0.703827	0.0204595	Modellparzelle
4	B			11.5964	50.6278	0.71716	0.0195146	0.814633	0.00693499	0.709208	0.0195744	Modellparzelle
4	B			11.5966	50.6278	0.706795	0.0357422	0.809738	0.00571587	0.705544	0.0163513	Modellparzelle
4	B			11.5965	50.6278	0.705799	0.0342274	0.813349	0.00695804	0.709696	0.0206282	Modellparzelle
4	B			11.5964	50.6278	0.718057	0.0207914	0.816173	0.0064331	0.713884	0.0184919	Modellparzelle
4	B			11.5966	50.6277	0.69756	0.037325	0.807718	0.00666067	0.71151	0.0174963	Modellparzelle
4	B			11.5965	50.6278	0.707684	0.0251875	0.813997	0.00533783	0.712764	0.0170095	Modellparzelle
4	B			11.5964	50.6278	0.713649	0.0204112	0.816766	0.00596712	0.711782	0.0216702	Modellparzelle
4	B			11.5966	50.6277	0.695301	0.0408444	0.807663	0.00657784	0.711629	0.0188471	Modellparzelle
4	B			11.5965	50.6277	0.713726	0.0244167	0.81529	0.00464049	0.71087	0.0235381	Modellparzelle
4	B			11.5964	50.6278	0.715028	0.0224693	0.818219	0.00641663	0.714526	0.02056	Modellparzelle
4	B			11.5966	50.6277	0.69917	0.0291884	0.806016	0.00653225	0.707991	0.0158306	Modellparzelle
4	B			11.5965	50.6277	0.718032	0.023622	0.817952	0.00567509	0.706936	0.017755	Modellparzelle
4	B			11.5964	50.6277	0.713536	0.028738	0.816811	0.00504299	0.715083	0.0174319	Modellparzelle
4	B			11.5966	50.6277	0.69749	0.0372791	0.806954	0.00655303	0.696256	0.0174886	Modellparzelle
4	B			11.5965	50.6277	0.712276	0.026077	0.818542	0.0044211	0.704866	0.0192919	Modellparzelle
4	B			11.5964	50.6277	0.718475	0.0189317	0.818689	0.00529623	0.718099	0.0180015	Modellparzelle
4	B			11.5966	50.6277	0.712384	0.0239041	0.805988	0.00707626	0.682721	0.0183536	Modellparzelle
4	B			11.5965	50.6277	0.706328	0.0323786	0.817321	0.00532349	0.698316	0.0194566	Modellparzelle
4	B			11.5964	50.6277	0.720289	0.0188213	0.816742	0.00507563	0.720992	0.0167342	Modellparzelle
4	B			11.5966	50.6277	0.706915	0.0251342	0.806372	0.00734487	0.68125	0.0235084	Modellparzelle
4	B			11.5965	50.6277	0.702709	0.0324509	0.812495	0.00673814	0.686024	0.0243752	Modellparzelle
4	B			11.5964	50.6277	0.712383	0.0280798	0.814852	0.00654675	0.708919	0.0171329	Modellparzelle
4	B			11.5966	50.6277	0.685457	0.0559963	0.804279	0.00688614	0.689073	0.0263159	Modellparzelle
4	B			11.5965	50.6277	0.698307	0.041155	0.804619	0.013714	0.679241	0.0291218	Modellparzelle
4	B			11.5964	50.6277	0.716957	0.0200114	0.813246	0.00501966	0.694792	0.0222446	Modellparzelle
4	B			11.5966	50.6277	0.670992	0.0635787	0.79664	0.0083399	0.678235	0.0307119	Modellparzelle
4	B			11.5965	50.6277	0.683485	0.0518505	0.803828	0.00847542	0.654025	0.0440092	Modellparzelle
4	B			11.5964	50.6277	0.71875	0.0202756	0.813136	0.00543083	0.698189	0.0207993	Modellparzelle
4	B			11.5966	50.6276	0.652671	0.0869121	0.797852	0.00860653	0.673511	0.0316281	Modellparzelle
4	B			11.5965	50.6276	0.674693	0.064388	0.807861	0.00903261	0.650339	0.0487446	Modellparzelle
4	B			11.5964	50.6277	0.714576	0.0264349	0.809607	0.00630168	0.694629	0.0190147	Modellparzelle
4	B			11.5966	50.6276	0.627411	0.0957791	0.789375	0.0103035	0.658562	0.0288595	Modellparzelle
4	B			11.5965	50.6276	0.661473	0.0680358	0.803506	0.0131044	0.652375	0.0432498	Modellparzelle
4	B			11.5964	50.6276	0.711207	0.0228507	0.806494	0.00794296	0.688186	0.0205282	Modellparzelle
4	B			11.5965	50.628	0.717509	0.0203146	0.819257	0.00635719	0.721718	0.0215799	Modellparzelle
4	B			11.5966	50.628	0.722819	0.0155287	0.81777	0.00823509	0.728337	0.0204534	Modellparzelle
4	B			11.5967	50.628	0.716626	0.0293405	0.823373	0.0054158	0.730464	0.0234182	Modellparzelle
4	B			11.5965	50.628	0.713581	0.0218184	0.817618	0.00675055	0.714818	0.0259055	Modellparzelle
4	B			11.5966	50.628	0.726344	0.0120633	0.819281	0.00585419	0.723154	0.0241671	Modellparzelle
4	B			11.5967	50.628	0.720434	0.020504	0.824606	0.00512278	0.717635	0.0225616	Modellparzelle
4	B			11.5965	50.628	0.71952	0.0186416	0.817198	0.00683127	0.70253	0.0276153	Modellparzelle
4	B			11.5966	50.628	0.724588	0.0165415	0.819373	0.00591199	0.711596	0.0293492	Modellparzelle
4	B			11.5967	50.628	0.725509	0.0211213	0.824043	0.00502331	0.71879	0.0188247	Modellparzelle
4	B			11.5965	50.628	0.717225	0.0175354	0.821238	0.00557217	0.710311	0.0239263	Modellparzelle
4	B			11.5966	50.628	0.725907	0.0164215	0.822314	0.00493813	0.713776	0.020543	Modellparzelle
4	B			11.5967	50.628	0.722214	0.0205245	0.821271	0.00499971	0.719749	0.0206165	Modellparzelle
4	B			11.5965	50.628	0.718902	0.0191018	0.821832	0.00525348	0.715421	0.0217962	Modellparzelle
4	B			11.5966	50.628	0.715998	0.0247224	0.817476	0.00594046	0.690516	0.02599	Modellparzelle
4	B			11.5967	50.628	0.721529	0.0177504	0.821153	0.00619086	0.715734	0.0289385	Modellparzelle
4	B			11.5965	50.628	0.716652	0.0196912	0.82142	0.00615364	0.709555	0.0227073	Modellparzelle
4	B			11.5966	50.628	0.720769	0.0192794	0.816417	0.00762231	0.688633	0.0304783	Modellparzelle
4	B			11.5967	50.628	0.723748	0.0183832	0.818874	0.00708194	0.709537	0.0236962	Modellparzelle
4	B			11.5965	50.6281	0.717559	0.0204681	0.819885	0.00686353	0.707828	0.0200479	Modellparzelle
4	B			11.5966	50.628	0.721181	0.0162716	0.819707	0.00533396	0.703736	0.01947	Modellparzelle
4	B			11.5967	50.628	0.724769	0.0188326	0.819885	0.00683355	0.711556	0.0207209	Modellparzelle
4	B			11.5965	50.6281	0.714297	0.0274841	0.820625	0.00568727	0.692586	0.0289867	Modellparzelle
4	B			11.5966	50.6281	0.71298	0.024221	0.819267	0.00623623	0.697885	0.0242944	Modellparzelle
4	B			11.5967	50.6281	0.721917	0.0180389	0.819588	0.00607423	0.717118	0.0202555	Modellparzelle
4	B			11.5965	50.6281	0.708193	0.0234213	0.822947	0.00651836	0.705809	0.0221847	Modellparzelle
4	B			11.5966	50.6281	0.718212	0.0270529	0.820953	0.00620258	0.701218	0.0228258	Modellparzelle
4	B			11.5967	50.6281	0.716901	0.0260581	0.821052	0.00711839	0.716985	0.0204174	Modellparzelle
4	B			11.5965	50.6281	0.720522	0.0218144	0.823192	0.00680805	0.711686	0.0292498	Modellparzelle
4	B			11.5966	50.6281	0.721211	0.0218368	0.821772	0.00552167	0.711322	0.0246962	Modellparzelle
4	B			11.5967	50.6281	0.720041	0.022457	0.820687	0.00627558	0.707598	0.0227011	Modellparzelle
4	B			11.5965	50.6281	0.724432	0.0171587	0.822861	0.00697286	0.713643	0.02448	Modellparzelle
4	B			11.5966	50.6281	0.723362	0.0182931	0.819792	0.00551783	0.703518	0.0243945	Modellparzelle
4	B			11.5967	50.6281	0.712647	0.0313098	0.820818	0.00640715	0.691542	0.0237769	Modellparzelle
4	B			11.5965	50.6281	0.726747	0.0168767	0.824847	0.00558197	0.709647	0.0272753	Modellparzelle
4	B			11.5966	50.6281	0.717734	0.0262091	0.819225	0.00717208	0.701217	0.0237397	Modellparzelle
4	B			11.5967	50.6281	0.708334	0.0338596	0.821324	0.00650814	0.685821	0.0232944	Modellparzelle
4	B			11.5965	50.6281	0.727514	0.0146894	0.823071	0.00705641	0.710149	0.0216956	Modellparzelle
4	B			11.5966	50.6281	0.72074	0.0181076	0.819186	0.00558066	0.704648	0.0244271	Modellparzelle
4	B			11.5967	50.6281	0.714621	0.0352907	0.821428	0.0052995	0.687662	0.0191182	Modellparzelle
4	B			11.5965	50.6281	0.722276	0.0164531	0.822373	0.00659061	0.714644	0.0264426	Modellparzelle
4	B			11.5966	50.6281	0.727582	0.0158451	0.821571	0.00507727	0.715236	0.0212438	Modellparzelle
4	B			11.5967	50.6281	0.718449	0.0272303	0.820062	0.00568185	0.681523	0.0263764	Modellparzelle
4	B			11.5965	50.6282	0.716722	0.0241764	0.820849	0.00735019	0.694356	0.0230609	Modellparzelle
4	B			11.5966	50.6282	0.725279	0.0138003	0.819263	0.0055776	0.724668	0.0228763	Modellparzelle
4	B			11.5967	50.6281	0.713732	0.0251179	0.814055	0.0119334	0.679954	0.0353649	Modellparzelle
4	B			11.5965	50.6282	0.722963	0.0157472	0.82189	0.00625212	0.707031	0.0276287	Modellparzelle
4	B			11.5966	50.6282	0.719158	0.0237524	0.820828	0.00559192	0.732993	0.0171715	Modellparzelle
4	B			11.5967	50.6282	0.714227	0.0354317	0.816738	0.00616712	0.685979	0.024701	Modellparzelle
4	B			11.5965	50.6282	0.720706	0.0252701	0.822399	0.00628163	0.711577	0.0233607	Modellparzelle
4	B			11.5966	50.6282	0.716346	0.0186992	0.820768	0.00572921	0.72242	0.0265997	Modellparzelle
4	B			11.5967	50.6282	0.728412	0.0155151	0.819004	0.00517648	0.690063	0.024008	Modellparzelle
4	B			11.5965	50.6282	0.726384	0.0162525	0.823573	0.0054631	0.708704	0.0247879	Modellparzelle
4	B			11.5966	50.6282	0.712772	0.034916	0.820169	0.00600662	0.724447	0.0271635	Modellparzelle
4	B			11.5967	50.6282	0.725141	0.0143155	0.818509	0.00576164	0.698915	0.0159661	Modellparzelle
4	B			11.5965	50.6282	0.724842	0.0138958	0.826048	0.00533401	0.721801	0.0174569	Modellparzelle
4	B			11.5966	50.6282	0.718344	0.0291331	0.819077	0.00545669	0.726884	0.0235674	Modellparzelle
4	B			11.5967	50.6282	0.727498	0.0141565	0.81905	0.00693889	0.700117	0.0217238	Modellparzelle
4	B			11.5965	50.6282	0.723036	0.025398	0.822378	0.00526818	0.723622	0.0166895	Modellparzelle
4	B			11.5966	50.6282	0.719482	0.0288625	0.820343	0.00535014	0.728533	0.0202482	Modellparzelle
4	B			11.5968	50.6282	0.716887	0.0360106	0.820964	0.00581823	0.706822	0.0210426	Modellparzelle
4	B			11.5965	50.6282	0.728249	0.0137362	0.821461	0.00662938	0.722128	0.0278675	Modellparzelle
4	B			11.5966	50.6282	0.71782	0.027789	0.821263	0.00496271	0.73708	0.019	Modellparzelle
4	B			11.5968	50.6282	0.720043	0.0260745	0.821443	0.00619862	0.699677	0.0226054	Modellparzelle
4	B			11.5965	50.6283	0.72413	0.023425	0.819616	0.00666848	0.716181	0.0272696	Modellparzelle
4	B			11.5967	50.6282	0.723229	0.0186985	0.822761	0.00526405	0.734715	0.0174403	Modellparzelle
4	B			11.5968	50.6282	0.729632	0.014527	0.817524	0.00685753	0.713649	0.0181053	Modellparzelle
4	B			11.5965	50.6283	0.726419	0.0130298	0.822928	0.00529146	0.725112	0.0162388	Modellparzelle
4	B			11.5967	50.6283	0.717186	0.0269651	0.819398	0.00513818	0.730039	0.0225138	Modellparzelle
4	B			11.5968	50.6283	0.718294	0.0252456	0.821543	0.00542885	0.709157	0.0197897	Modellparzelle
4	B			11.5966	50.6283	0.720973	0.0190499	0.82023	0.00508118	0.727464	0.0173818	Modellparzelle
4	B			11.5967	50.6283	0.719333	0.0165652	0.81483	0.00572843	0.722711	0.0220971	Modellparzelle
4	B			11.5968	50.6283	0.72996	0.0142588	0.821819	0.0056564	0.71513	0.0215961	Modellparzelle
4	B			11.5966	50.6283	0.720611	0.0187055	0.816983	0.00579935	0.711356	0.0227421	Modellparzelle
4	B			11.5967	50.6283	0.717839	0.0169064	0.813053	0.00824839	0.724652	0.0210184	Modellparzelle
4	B			11.5968	50.6283	0.7255	0.0194503	0.822528	0.0064135	0.71481	0.0217089	Modellparzelle
4	B			11.5966	50.6283	0.712852	0.019074	0.81734	0.0065399	0.713399	0.0198456	Modellparzelle
4	B			11.5967	50.6283	0.715215	0.0176163	0.814848	0.00833519	0.733098	0.0189793	Modellparzelle
4	B			11.5968	50.6283	0.723202	0.0278867	0.822848	0.00513797	0.719788	0.0182819	Modellparzelle
4	B			11.5966	50.6283	0.717099	0.0183085	0.817026	0.00542365	0.713382	0.0201105	Modellparzelle
4	B			11.5967	50.6283	0.720755	0.0204256	0.818905	0.00704365	0.732642	0.0133105	Modellparzelle
4	B			11.5968	50.6283	0.723623	0.0178119	0.823533	0.00513338	0.73004	0.0127103	Modellparzelle
4	B			11.5966	50.6283	0.713933	0.0321757	0.814113	0.00685612	0.70118	0.0291063	Modellparzelle
4	B			11.5967	50.6283	0.720763	0.0184352	0.817932	0.00625193	0.721034	0.0330229	Modellparzelle
4	B			11.5968	50.6283	0.724531	0.0207143	0.822691	0.00632065	0.723405	0.0243641	Modellparzelle
4	B			11.5966	50.6283	0.720863	0.0167214	0.816952	0.00510934	0.726074	0.0200491	Modellparzelle
4	B			11.5967	50.6283	0.724395	0.0143343	0.817538	0.00636131	0.717777	0.0213212	Modellparzelle
4	B			11.5968	50.6283	0.727723	0.0212852	0.82591	0.00574372	0.714545	0.0227338	Modellparzelle
4	B			11.5966	50.6284	0.724252	0.0165836	0.816686	0.00557144	0.727953	0.0145138	Modellparzelle
4	B			11.5967	50.6284	0.721395	0.0250238	0.818026	0.00632266	0.714962	0.022353	Modellparzelle
4	B			11.5968	50.6283	0.715762	0.0299436	0.825404	0.00717203	0.708689	0.0290755	Modellparzelle
4	B			11.5966	50.6284	0.725812	0.0142724	0.814768	0.00545486	0.708243	0.025331	Modellparzelle
4	B			11.5967	50.6284	0.726334	0.0122405	0.821097	0.00640795	0.725308	0.0182738	Modellparzelle
4	B			11.5968	50.6284	0.726598	0.0182976	0.827245	0.00531998	0.716437	0.0236022	Modellparzelle
4	B			11.5966	50.6284	0.726169	0.0186385	0.815647	0.00609011	0.712997	0.0206609	Modellparzelle
4	B			11.5967	50.6284	0.725954	0.0162923	0.823355	0.00490102	0.722954	0.0247394	Modellparzelle
4	B			11.5968	50.6284	0.728565	0.016589	0.827016	0.00559933	0.710789	0.0216952	Modellparzelle
4	B			11.5966	50.6284	0.7248	0.0192551	0.814325	0.0076249	0.714996	0.0206912	Modellparzelle
4	B			11.5967	50.6284	0.722671	0.0194143	0.821158	0.00639609	0.715299	0.0246816	Modellparzelle
4	B			11.5968	50.6284	0.712815	0.042704	0.825305	0.00645485	0.708557	0.0230591	Modellparzelle
4	B			11.5966	50.6284	0.717414	0.0181124	0.815741	0.00723759	0.718495	0.0216156	Modellparzelle
4	B			11.5967	50.6284	0.726446	0.0169891	0.825072	0.00574595	0.712611	0.0310431	Modellparzelle
4	B			11.5968	50.6284	0.71753	0.0293627	0.828739	0.00506449	0.713092	0.0205233	Modellparzelle
4	B			11.5966	50.6284	0.720771	0.0161721	0.816246	0.00673829	0.71669	0.0283037	Modellparzelle
4	B			11.5967	50.6284	0.725301	0.0206482	0.825223	0.00597265	0.717574	0.0277833	Modellparzelle
4	B			11.5968	50.6284	0.724668	0.0232337	0.827734	0.00516047	0.715707	0.0170418	Modellparzelle
4	B			11.5966	50.6284	0.720079	0.0128031	0.816232	0.00626471	0.718378	0.0256855	Modellparzelle
4	B			11.5967	50.6284	0.730255	0.00973933	0.82642	0.0048099	0.715644	0.0277412	Modellparzelle
4	B			11.5968	50.6284	0.723636	0.0235307	0.825955	0.00561979	0.715288	0.0188883	Modellparzelle
4	B			11.5966	50.6285	0.722552	0.0123003	0.819017	0.00580515	0.720505	0.0256944	Modellparzelle
4	B			11.5967	50.6284	0.727893	0.0108833	0.826049	0.00445158	0.722496	0.0197158	Modellparzelle
4	B			11.5968	50.6284	0.719075	0.0219489	0.822959	0.00616837	0.716195	0.0172756	Modellparzelle
4	B			11.5966	50.6285	0.719118	0.0190033	0.818691	0.00658534	0.716937	0.0243071	Modellparzelle
4	B			11.5967	50.6285	0.721951	0.0119636	0.823888	0.00395206	0.720891	0.0226284	Modellparzelle
4	B			11.5968	50.6285	0.718162	0.016739	0.822032	0.00814667	0.712002	0.0255628	Modellparzelle
4	B			11.5966	50.6285	0.718473	0.0158479	0.820122	0.00531348	0.717678	0.0184621	Modellparzelle
4	B			11.5967	50.6285	0.721823	0.0148698	0.822689	0.00525985	0.718377	0.0331508	Modellparzelle
4	B			11.5968	50.6285	0.726418	0.0108389	0.823832	0.0062488	0.703108	0.0240413	Modellparzelle
4	B			11.5966	50.6285	0.722454	0.0132666	0.819244	0.00756911	0.717078	0.0211009	Modellparzelle
4	B			11.5967	50.6285	0.724428	0.0120697	0.822573	0.00612167	0.722207	0.019157	Modellparzelle
4	B			11.5968	50.6285	0.720075	0.0183349	0.824644	0.00694807	0.705198	0.0222003	Modellparzelle
4	B			11.5966	50.6285	0.725966	0.012606	0.817398	0.00532968	0.704402	0.0244421	Modellparzelle
4	B			11.5967	50.6285	0.721223	0.0146306	0.822204	0.00479659	0.715731	0.0181095	Modellparzelle
4	B			11.5968	50.6285	0.7179	0.0202096	0.824268	0.00537461	0.707301	0.0192707	Modellparzelle
4	B			11.5966	50.6285	0.720923	0.0219877	0.819878	0.00686348	0.706935	0.0221279	Modellparzelle
4	B			11.5967	50.6285	0.716873	0.0176271	0.819207	0.00541528	0.698506	0.0263558	Modellparzelle
4	B			11.5968	50.6285	0.720274	0.0237677	0.824901	0.00475088	0.714395	0.0220347	Modellparzelle
4	B			11.5966	50.6285	0.717089	0.0334755	0.82134	0.00620864	0.717227	0.0217908	Modellparzelle
4	B			11.5967	50.6285	0.720587	0.0195281	0.821245	0.00525199	0.706039	0.0194417	Modellparzelle
4	B			11.5968	50.6285	0.722712	0.0133498	0.820663	0.00701263	0.697946	0.0244766	Modellparzelle
4	B			11.5966	50.6286	0.718234	0.0208665	0.821921	0.00527298	0.716422	0.0205596	Modellparzelle
4	B			11.5967	50.6285	0.71986	0.0143743	0.820122	0.00578214	0.693953	0.0268233	Modellparzelle
4	B			11.5968	50.6285	0.714205	0.0212627	0.822203	0.00547022	0.69694	0.0229989	Modellparzelle
4	B			11.5966	50.6286	0.716462	0.0147346	0.819808	0.00585551	0.716338	0.0173561	Modellparzelle
4	B			11.5967	50.6286	0.719822	0.0133444	0.821843	0.00542456	0.702752	0.0220493	Modellparzelle
4	B			11.5968	50.6285	0.725935	0.0121683	0.822964	0.00583807	0.700733	0.0219819	Modellparzelle
4	B			11.5966	50.6286	0.712902	0.0236678	0.819619	0.00570349	0.711028	0.0263504	Modellparzelle
4	B			11.5967	50.6286	0.724466	0.0113946	0.823562	0.00475736	0.708436	0.0201914	Modellparzelle
4	B			11.5968	50.6286	0.719294	0.0164823	0.822104	0.00552213	0.702792	0.0195435	Modellparzelle
4	B			11.5966	50.6286	0.716412	0.017307	0.822343	0.00564282	0.722535	0.0217759	Modellparzelle
4	B			11.5967	50.6286	0.719806	0.0183924	0.822804	0.00499308	0.712603	0.0158579	Modellparzelle
4	B			11.5968	50.6286	0.720748	0.0183282	0.821337	0.00523063	0.703154	0.0207306	Modellparzelle
4	B			11.5966	50.6286	0.719225	0.0140119	0.82283	0.00576157	0.717467	0.0237336	Modellparzelle
4	B			11.5967	50.6286	0.720027	0.0137119	0.822437	0.00539116	0.700931	0.0161272	Modellparzelle
4	B			11.5968	50.6286	0.71638	0.0234252	0.823643	0.00603488	0.712003	0.0205816	Modellparzelle
4	B			11.5966	50.6286	0.717853	0.0173798	0.822126	0.0061142	0.717799	0.0194436	Modellparzelle
4	B			11.5967	50.6286	0.711749	0.0235475	0.821417	0.0061262	0.708011	0.0187502	Modellparzelle
4	B			11.5968	50.6286	0.715966	0.0230675	0.82266	0.00735924	0.717764	0.0215713	Modellparzelle
4	B			11.5966	50.6286	0.710778	0.0312286	0.821372	0.00527768	0.703128	0.0164171	Modellparzelle
4	B			11.5967	50.6286	0.720013	0.0142848	0.822178	0.00500683	0.706695	0.017753	Modellparzelle
4	B			11.5968	50.6286	0.723327	0.0128967	0.823577	0.0053817	0.716819	0.0201077	Modellparzelle
4	B			11.5966	50.6286	0.724097	0.0170101	0.822919	0.00579311	0.69372	0.0262829	Modellparzelle
4	B			11.5967	50.6286	0.719213	0.0135462	0.821522	0.00573857	0.708444	0.023196	Modellparzelle
4	B			11.5968	50.6286	0.719964	0.0169635	0.821935	0.00696329	0.713711	0.0218265	Modellparzelle
4	B			11.5966	50.6287	0.72138	0.0155882	0.82407	0.00520521	0.714404	0.0217048	Modellparzelle
4	B			11.5967	50.6286	0.724161	0.0139796	0.822888	0.00521371	0.707605	0.0161332	Modellparzelle
4	B			11.5968	50.6286	0.72819	0.0115297	0.82495	0.00616731	0.704334	0.0267472	Modellparzelle
4	B			11.5966	50.6287	0.71795	0.022779	0.826076	0.00587492	0.722891	0.0188874	Modellparzelle
4	B			11.5967	50.6287	0.726553	0.0102891	0.824643	0.00542737	0.715098	0.0225117	Modellparzelle
4	B			11.5968	50.6287	0.72763	0.0166286	0.827123	0.00501866	0.705964	0.0245501	Modellparzelle
4	B			11.5966	50.6287	0.727283	0.0145553	0.824454	0.00651358	0.715175	0.0238338	Modellparzelle
4	B			11.5967	50.6287	0.73153	0.00933346	0.826184	0.00481937	0.723787	0.0174887	Modellparzelle
4	B			11.5968	50.6287	0.720677	0.0226034	0.825015	0.00491512	0.706229	0.0215587	Modellparzelle
4	B			11.5966	50.6287	0.7329	0.00903806	0.826475	0.00529037	0.708359	0.0211193	Modellparzelle
4	B			11.5967	50.6287	0.729047	0.0137036	0.825369	0.00527107	0.711452	0.0221338	Modellparzelle
4	B			11.5968	50.6287	0.724071	0.0188557	0.821806	0.00514764	0.707117	0.0184781	Modellparzelle
4	B			11.5966	50.6287	0.728263	0.0145829	0.826971	0.00573154	0.712535	0.0222763	Modellparzelle
4	B			11.5967	50.6287	0.725597	0.0133903	0.823574	0.00662721	0.704933	0.0270692	Modellparzelle
4	B			11.5968	50.6287	0.722669	0.0175982	0.818984	0.00668202	0.690863	0.0281065	Modellparzelle
4	B			11.5966	50.6287	0.720368	0.023728	0.826074	0.00575754	0.693895	0.0253745	Modellparzelle
4	B			11.5967	50.6287	0.723435	0.0183142	0.821506	0.00614355	0.680745	0.0266258	Modellparzelle
4	B			11.5968	50.6287	0.702955	0.039479	0.818766	0.00650681	0.695941	0.0265461	Modellparzelle
4	B			11.5966	50.6287	0.726655	0.0159628	0.826833	0.00630428	0.69841	0.0199714	Modellparzelle
4	B			11.5967	50.6287	0.72119	0.0200397	0.81731	0.00971055	0.704407	0.0277664	Modellparzelle
4	B			11.5968	50.6287	0.713845	0.0269031	0.817165	0.00631589	0.693548	0.0283131	Modellparzelle
4	B			11.5966	50.6288	0.720195	0.0213431	0.8267	0.00623302	0.69366	0.0261967	Modellparzelle
4	B			11.5967	50.6287	0.718607	0.0172407	0.818438	0.00960005	0.705792	0.0226436	Modellparzelle
4	B			11.5968	50.6287	0.71181	0.0225195	0.817148	0.00688955	0.686155	0.0242343	Modellparzelle
4	B			11.5966	50.6288	0.728564	0.0187214	0.827401	0.00550158	0.701233	0.0304774	Modellparzelle
4	B			11.5967	50.6288	0.722482	0.0166811	0.822285	0.00521818	0.703848	0.0232252	Modellparzelle
4	B			11.5968	50.6287	0.715895	0.0206861	0.816634	0.00668247	0.680797	0.0279779	Modellparzelle
4	B			11.5966	50.6288	0.727535	0.0144623	0.828387	0.00551352	0.715641	0.0252764	Modellparzelle
4	B			11.5967	50.6288	0.714878	0.0188164	0.822433	0.00808887	0.69392	0.0209224	Modellparzelle
4	B			11.5968	50.6288	0.717282	0.0147108	0.817514	0.00623924	0.689794	0.0188759	Modellparzelle
4	B			11.5966	50.6288	0.730543	0.0160532	0.82553	0.0073121	0.708139	0.0242632	Modellparzelle
4	B			11.5967	50.6288	0.722476	0.018034	0.821917	0.00578673	0.690527	0.0197439	Modellparzelle
4	B			11.5968	50.6288	0.709494	0.0256973	0.816323	0.00564564	0.680135	0.0270558	Modellparzelle
4	B			11.5966	50.6288	0.725124	0.0252369	0.82463	0.00747185	0.714201	0.0259063	Modellparzelle
4	B			11.5967	50.6288	0.722888	0.0195251	0.821403	0.00645902	0.698828	0.025751	Modellparzelle
4	B			11.5968	50.6288	0.713888	0.0202361	0.819264	0.00694539	0.69194	0.0257341	Modellparzelle
4	B			11.5966	50.6288	0.725314	0.0125243	0.824222	0.00625432	0.724183	0.015575	Modellparzelle
4	B			11.5967	50.6288	0.723943	0.0199148	0.821251	0.00545055	0.696333	0.0223706	Modellparzelle
4	B			11.5968	50.6288	0.716986	0.0178006	0.819136	0.00689765	0.706747	0.020201	Modellparzelle
4	B			11.5966	50.6288	0.726848	0.0148706	0.818297	0.00769289	0.711903	0.0222551	Modellparzelle
4	B			11.5967	50.6288	0.729607	0.0138703	0.819107	0.00786472	0.687174	0.0300182	Modellparzelle
4	B			11.5968	50.6288	0.712897	0.0264882	0.82079	0.00621353	0.711861	0.0236677	Modellparzelle
4	B			11.5966	50.6288	0.719067	0.0245412	0.819808	0.00571912	0.699402	0.0275305	Modellparzelle
4	B			11.5967	50.6288	0.730363	0.0159403	0.821086	0.00798435	0.684489	0.0356201	Modellparzelle
4	B			11.5968	50.6288	0.718587	0.0250791	0.82417	0.00570211	0.702028	0.0210388	Modellparzelle
4	B			11.5966	50.6289	0.716558	0.0252522	0.820594	0.00601523	0.713141	0.0217813	Modellparzelle
4	B			11.5967	50.6289	0.727787	0.0110519	0.822228	0.00594642	0.691298	0.0265176	Modellparzelle
4	B			11.5968	50.6288	0.710531	0.0290849	0.823824	0.00687449	0.712219	0.023206	Modellparzelle
4	B			11.5966	50.6289	0.70718	0.0259323	0.819583	0.00631562	0.716032	0.0288058	Modellparzelle
4	B			11.5967	50.6289	0.7194	0.0234974	0.821481	0.00590082	0.697796	0.0283108	Modellparzelle
4	B			11.5968	50.6289	0.723936	0.0179822	0.822092	0.00524805	0.708125	0.0234132	Modellparzelle
4	B			11.5966	50.6289	0.706154	0.0282802	0.819846	0.00619869	0.706683	0.0289291	Modellparzelle
4	B			11.5967	50.6289	0.722514	0.0162694	0.816629	0.00623148	0.699228	0.0242844	Modellparzelle
4	B			11.5968	50.6289	0.722532	0.0199667	0.822347	0.0057688	0.709564	0.0224205	Modellparzelle
4	B			11.5966	50.6289	0.710688	0.0294592	0.819369	0.00595632	0.710514	0.0240277	Modellparzelle
4	B			11.5967	50.6289	0.71239	0.0299954	0.813546	0.00642531	0.692281	0.0248033	Modellparzelle
4	B			11.5968	50.6289	0.715894	0.0261835	0.82025	0.00612227	0.698219	0.0239275	Modellparzelle
4	B			11.5966	50.6289	0.716998	0.0213431	0.819014	0.00524714	0.705117	0.0185005	Modellparzelle
4	B			11.5967	50.6289	0.710733	0.0427556	0.810627	0.00654589	0.689756	0.0235838	Modellparzelle
4	B			11.5968	50.6289	0.722312	0.0173017	0.820294	0.00550408	0.702233	0.0188567	Modellparzelle
4	B			11.5966	50.6289	0.709927	0.0249833	0.817404	0.00596717	0.698011	0.0197555	Modellparzelle
4	B			11.5967	50.6289	0.721702	0.0169079	0.816173	0.00559153	0.711739	0.0175929	Modellparzelle
4	B			11.5968	50.6289	0.72125	0.0180388	0.820802	0.00577614	0.708126	0.0190349	Modellparzelle
4	B			11.5966	50.6289	0.711271	0.0331542	0.815344	0.00893122	0.701235	0.0243891	Modellparzelle
4	B			11.5967	50.6289	0.722014	0.0230616	0.81796	0.00600788	0.701155	0.0285052	Modellparzelle
4	B			11.5968	50.6289	0.725321	0.0145674	0.823617	0.00545861	0.714267	0.0184275	Modellparzelle
4	B			11.5966	50.629	0.714946	0.0234486	0.815877	0.00663019	0.703268	0.0227721	Modellparzelle
4	B			11.5967	50.6289	0.71947	0.0197867	0.817291	0.0076861	0.708203	0.0288433	Modellparzelle
4	B			11.5968	50.6289	0.723235	0.0185163	0.822692	0.00519237	0.70715	0.0202661	Modellparzelle
4	B			11.5966	50.629	0.709211	0.0232535	0.811132	0.00757007	0.692499	0.0270863	Modellparzelle
4	B			11.5967	50.629	0.72331	0.0243908	0.813487	0.00779866	0.707923	0.0214236	Modellparzelle
4	B			11.5968	50.629	0.728446	0.0141602	0.821419	0.00572098	0.708753	0.0212101	Modellparzelle
4	B			11.5966	50.629	0.707767	0.0300839	0.812821	0.0069717	0.686907	0.0296298	Modellparzelle
4	B			11.5967	50.629	0.731258	0.0143809	0.81545	0.00698652	0.704459	0.0279683	Modellparzelle
4	B			11.5968	50.629	0.725555	0.0181265	0.821719	0.00550202	0.70632	0.0220301	Modellparzelle
4	B			11.5966	50.629	0.715321	0.034547	0.81723	0.0070822	0.692975	0.0260196	Modellparzelle
4	B			11.5967	50.629	0.723871	0.0239541	0.818754	0.00645946	0.709524	0.0191838	Modellparzelle
4	B			11.5968	50.629	0.721379	0.022938	0.823978	0.00618151	0.714971	0.0247511	Modellparzelle
4	B			11.5966	50.629	0.718153	0.0332514	0.817965	0.00778341	0.699449	0.0203747	Modellparzelle
4	B			11.5967	50.629	0.726998	0.0164067	0.819902	0.00659045	0.704273	0.0207272	Modellparzelle
4	B			11.5968	50.629	0.715926	0.030132	0.824849	0.0057853	0.719731	0.0161801	Modellparzelle
4	B			11.5966	50.629	0.730414	0.0151092	0.819934	0.00555983	0.699074	0.0338527	Modellparzelle
4	B			11.5967	50.629	0.719179	0.0198382	0.819519	0.00495184	0.688314	0.0229378	Modellparzelle
4	B			11.5968	50.629	0.714279	0.0353684	0.820963	0.00686733	0.722044	0.0183198	Modellparzelle
4	B			11.5966	50.629	0.726799	0.016854	0.820302	0.00627592	0.703568	0.0298108	Modellparzelle
4	B			11.5967	50.629	0.720035	0.0227068	0.817449	0.00876686	0.67584	0.0286047	Modellparzelle
4	B			11.5968	50.629	0.723603	0.0186859	0.818203	0.00847604	0.714741	0.0190728	Modellparzelle
4	B			11.5966	50.6291	0.728028	0.0176031	0.819836	0.00662686	0.697876	0.0267284	Modellparzelle
4	B			11.5967	50.629	0.719877	0.0201796	0.818155	0.00826816	0.681594	0.0259718	Modellparzelle
4	B			11.5968	50.629	0.723312	0.0184337	0.819483	0.00753487	0.71028	0.0217752	Modellparzelle
4	B			11.5966	50.6291	0.718944	0.0407136	0.819409	0.00645939	0.690153	0.0251546	Modellparzelle
4	B			11.5967	50.6291	0.718997	0.0224495	0.820463	0.00596798	0.687226	0.0222526	Modellparzelle
4	B			11.5968	50.629	0.725242	0.0192314	0.822506	0.00536537	0.711948	0.0248291	Modellparzelle
4	B			11.5966	50.6291	0.710449	0.0328758	0.817478	0.00688924	0.682292	0.0293437	Modellparzelle
4	B			11.5967	50.6291	0.715193	0.0266054	0.820529	0.00733718	0.678347	0.0270383	Modellparzelle
4	B			11.5968	50.6291	0.721519	0.0202758	0.821653	0.0064184	0.701604	0.0205227	Modellparzelle
4	B			11.5966	50.6291	0.711706	0.0272852	0.818249	0.00564126	0.671358	0.0240854	Modellparzelle
4	B			11.5967	50.6291	0.717721	0.0202152	0.822834	0.00682607	0.69245	0.021338	Modellparzelle
4	B			11.5968	50.6291	0.715753	0.0286669	0.823328	0.00598504	0.720067	0.0194793	Modellparzelle
4	B			11.5966	50.6291	0.699398	0.0454694	0.8159	0.00690032	0.662629	0.0340076	Modellparzelle
4	B			11.5967	50.6291	0.707811	0.0262862	0.819512	0.00883925	0.688211	0.0283039	Modellparzelle
4	B			11.5968	50.6291	0.706518	0.0378105	0.821625	0.005692	0.713834	0.0217853	Modellparzelle
4	B			11.5966	50.6291	0.70649	0.0296733	0.818798	0.00554338	0.662081	0.0325657	Modellparzelle
4	B			11.5967	50.6291	0.704338	0.038134	0.81498	0.00863142	0.691756	0.0305904	Modellparzelle
4	B			11.5968	50.6291	0.694315	0.0435704	0.817065	0.00599803	0.697343	0.0244687	Modellparzelle
6	B			11.5963	50.628	0.719281	0.0197322	0.803703	0.00937676	0.671574	0.0321181	Modellparzelle
6	B			11.5962	50.628	0.66079	0.045991	0.785493	0.0140006	0.659832	0.0238528	Modellparzelle
6	B			11.5961	50.628	0.687214	0.0293626	0.793045	0.0132041	0.673491	0.0249677	Modellparzelle
6	B			11.5963	50.6279	0.719965	0.0178938	0.802171	0.00912684	0.671588	0.0308405	Modellparzelle
6	B			11.5962	50.6279	0.658958	0.0566066	0.786998	0.0098236	0.665555	0.0236464	Modellparzelle
6	B			11.5961	50.628	0.694754	0.0278146	0.793186	0.0174499	0.672891	0.0268338	Modellparzelle
6	B			11.5963	50.6279	0.722165	0.0208211	0.797954	0.00810856	0.673427	0.0329751	Modellparzelle
6	B			11.5962	50.6279	0.659653	0.0666543	0.790918	0.012395	0.672209	0.0237215	Modellparzelle
6	B			11.5961	50.6279	0.693474	0.0236415	0.794379	0.0171114	0.667663	0.0269233	Modellparzelle
6	B			11.5963	50.6279	0.722472	0.0221621	0.799757	0.0083336	0.661783	0.0307896	Modellparzelle
6	B			11.5962	50.6279	0.674397	0.0623914	0.800219	0.0105446	0.672225	0.0299521	Modellparzelle
6	B			11.5961	50.6279	0.687186	0.0388709	0.79626	0.0137609	0.675589	0.0190956	Modellparzelle
6	B			11.5963	50.6279	0.722839	0.0192911	0.794951	0.017901	0.677974	0.0291588	Modellparzelle
6	B			11.5962	50.6279	0.708282	0.0255724	0.803592	0.0134316	0.671898	0.0323354	Modellparzelle
6	B			11.5961	50.6279	0.694301	0.0294529	0.799144	0.0135345	0.673483	0.0238355	Modellparzelle
6	B			11.5963	50.6279	0.72351	0.0163359	0.800611	0.0104696	0.677986	0.0248588	Modellparzelle
6	B			11.5962	50.6279	0.711154	0.0227343	0.801738	0.0151768	0.691527	0.0212901	Modellparzelle
6	B			11.5961	50.6279	0.699616	0.0262038	0.800047	0.0152677	0.686085	0.0193022	Modellparzelle
6	B			11.5963	50.6279	0.725203	0.0147384	0.793758	0.0211999	0.685238	0.0392682	Modellparzelle
6	B			11.5962	50.6279	0.71178	0.0267576	0.803183	0.0113427	0.678393	0.0387704	Modellparzelle
6	B			11.5961	50.6279	0.706911	0.0210226	0.805563	0.0097936	0.682553	0.0226897	Modellparzelle
6	B			11.5963	50.6279	0.728124	0.0141071	0.788	0.0319313	0.688561	0.0304575	Modellparzelle
6	B			11.5962	50.6279	0.688057	0.0414726	0.808105	0.00924003	0.692382	0.0268695	Modellparzelle
6	B			11.5961	50.6279	0.695645	0.0315417	0.806239	0.0067404	0.687699	0.0235161	Modellparzelle
6	B			11.5963	50.6278	0.727641	0.0143658	0.804854	0.0137039	0.70037	0.0222823	Modellparzelle
6	B			11.5962	50.6279	0.684636	0.0502728	0.803357	0.0115537	0.693654	0.0215887	Modellparzelle
6	B			11.5961	50.6279	0.706729	0.022893	0.806435	0.00862798	0.682963	0.0237293	Modellparzelle
6	B			11.5963	50.6278	0.729363	0.0145947	0.805583	0.0126541	0.704191	0.0214712	Modellparzelle
6	B			11.5962	50.6278	0.689676	0.0484652	0.804133	0.0111792	0.701663	0.0271541	Modellparzelle
6	B			11.5961	50.6278	0.70447	0.0340696	0.809792	0.00840137	0.682917	0.021408	Modellparzelle
6	B			11.5963	50.6278	0.722237	0.0147127	0.808399	0.00989178	0.697838	0.0200027	Modellparzelle
6	B			11.5962	50.6278	0.696885	0.0441358	0.809448	0.00769899	0.70103	0.0197471	Modellparzelle
6	B			11.596	50.6278	0.711352	0.0175113	0.810748	0.00896199	0.668738	0.0248212	Modellparzelle
6	B			11.5963	50.6278	0.720797	0.017344	0.808192	0.0111713	0.690691	0.023524	Modellparzelle
6	B			11.5961	50.6278	0.707897	0.037252	0.813898	0.00622622	0.709177	0.0180769	Modellparzelle
6	B			11.596	50.6278	0.705296	0.0296163	0.808547	0.00970173	0.661477	0.0291563	Modellparzelle
6	B			11.5963	50.6278	0.718237	0.0226158	0.81303	0.00650248	0.682579	0.0218825	Modellparzelle
6	B			11.5961	50.6278	0.705547	0.032956	0.814394	0.00762658	0.709957	0.0217631	Modellparzelle
6	B			11.596	50.6278	0.689364	0.0326941	0.801722	0.00761509	0.653177	0.0265604	Modellparzelle
6	B			11.5962	50.6278	0.713601	0.0292987	0.81047	0.0189914	0.67824	0.0225908	Modellparzelle
6	B			11.5961	50.6278	0.693121	0.0402278	0.813983	0.00903361	0.700439	0.0326146	Modellparzelle
6	B			11.596	50.6278	0.69282	0.0364357	0.804011	0.00829669	0.668907	0.024632	Modellparzelle
6	B			11.5962	50.6278	0.70989	0.033371	0.818376	0.00608851	0.683759	0.025266	Modellparzelle
6	B			11.5961	50.6278	0.680456	0.0680052	0.816369	0.0072368	0.711175	0.0176077	Modellparzelle
6	B			11.596	50.6278	0.703596	0.0244454	0.807546	0.00764631	0.671168	0.0240527	Modellparzelle
6	B			11.5962	50.6278	0.720771	0.0190945	0.816551	0.00487083	0.68653	0.0245271	Modellparzelle
6	B			11.5961	50.6278	0.70711	0.0284772	0.811995	0.00942962	0.701194	0.0190062	Modellparzelle
6	B			11.596	50.6278	0.69439	0.0342017	0.803983	0.00871375	0.661054	0.0252008	Modellparzelle
6	B			11.5962	50.6277	0.72344	0.0206622	0.813535	0.00603391	0.675213	0.0224474	Modellparzelle
6	B			11.5961	50.6277	0.709115	0.0315127	0.811695	0.0090019	0.697753	0.0218206	Modellparzelle
6	B			11.596	50.6278	0.694686	0.031896	0.799613	0.00837314	0.661763	0.0305697	Modellparzelle
6	B			11.5962	50.6277	0.721476	0.0221657	0.810476	0.00557282	0.67443	0.0166929	Modellparzelle
6	B			11.5961	50.6277	0.708625	0.0362451	0.812199	0.00835783	0.689504	0.0213908	Modellparzelle
6	B			11.596	50.6277	0.697086	0.0259478	0.80001	0.0075676	0.661176	0.0217059	Modellparzelle
6	B			11.5962	50.6277	0.714865	0.0336203	0.811477	0.0060999	0.680716	0.0203786	Modellparzelle
6	B			11.5961	50.6277	0.711032	0.024387	0.811591	0.00952492	0.687765	0.0197589	Modellparzelle
6	B			11.596	50.6277	0.683079	0.0360273	0.79754	0.00872093	0.6557	0.0238909	Modellparzelle
6	B			11.5962	50.6277	0.707559	0.0383025	0.811853	0.00675192	0.678449	0.0233941	Modellparzelle
6	B			11.5961	50.6277	0.707205	0.0256882	0.810659	0.0108756	0.683999	0.0258442	Modellparzelle
6	B			11.596	50.6277	0.677247	0.0389174	0.793808	0.00832373	0.646159	0.0231967	Modellparzelle
6	B			11.5962	50.6277	0.705777	0.0457527	0.806334	0.0119516	0.665894	0.0304178	Modellparzelle
6	B			11.5961	50.6277	0.691016	0.0468273	0.808097	0.0100461	0.67661	0.0194967	Modellparzelle
6	B			11.596	50.6277	0.680315	0.035121	0.795086	0.00716481	0.642727	0.0258793	Modellparzelle
6	B			11.5962	50.6277	0.707894	0.0290723	0.810516	0.00610614	0.68078	0.0203505	Modellparzelle
6	B			11.5961	50.6277	0.687605	0.0543889	0.802712	0.0110323	0.67023	0.018614	Modellparzelle
6	B			11.596	50.6277	0.674066	0.0435684	0.79597	0.0105268	0.637343	0.0316256	Modellparzelle
6	B			11.5962	50.6277	0.716043	0.0310482	0.811559	0.00517093	0.66799	0.0200499	Modellparzelle
6	B			11.5961	50.6277	0.693523	0.0402105	0.804143	0.0100525	0.664936	0.0257186	Modellparzelle
6	B			11.596	50.6277	0.678844	0.0384381	0.794808	0.0149469	0.636707	0.0265553	Modellparzelle
6	B			11.5961	50.628	0.682069	0.0283541	0.792971	0.0135351	0.67032	0.0248049	Modellparzelle
6	B			11.5962	50.628	0.646511	0.0725596	0.788172	0.0139479	0.666569	0.0303724	Modellparzelle
6	B			11.5963	50.628	0.717154	0.0226171	0.80687	0.0102656	0.672825	0.0424318	Modellparzelle
6	B			11.5961	50.628	0.692395	0.0244053	0.794735	0.0102587	0.67725	0.0246533	Modellparzelle
6	B			11.5962	50.628	0.671047	0.0451195	0.800935	0.00914136	0.676195	0.0238081	Modellparzelle
6	B			11.5963	50.628	0.71299	0.0274382	0.805759	0.00930121	0.679199	0.0397104	Modellparzelle
6	B			11.5961	50.628	0.695018	0.0227231	0.793986	0.0146999	0.681402	0.0237858	Modellparzelle
6	B			11.5962	50.628	0.681101	0.056962	0.801366	0.00974866	0.677759	0.025814	Modellparzelle
6	B			11.5963	50.628	0.713924	0.0237401	0.802878	0.00902082	0.66902	0.0340397	Modellparzelle
6	B			11.5961	50.628	0.690695	0.0329084	0.797867	0.0118988	0.686587	0.0237505	Modellparzelle
6	B			11.5962	50.628	0.683179	0.0399179	0.805141	0.00740899	0.68466	0.0285521	Modellparzelle
6	B			11.5963	50.628	0.704044	0.0313086	0.798852	0.0141376	0.673954	0.0437858	Modellparzelle
6	B			11.5961	50.628	0.699346	0.0241494	0.800486	0.00818657	0.674079	0.0201448	Modellparzelle
6	B			11.5962	50.628	0.664735	0.0639795	0.807458	0.00816101	0.690231	0.0249206	Modellparzelle
6	B			11.5963	50.628	0.702526	0.0410764	0.806139	0.00930587	0.669541	0.0368669	Modellparzelle
6	B			11.5961	50.628	0.682055	0.0324515	0.797473	0.0093923	0.66723	0.0225903	Modellparzelle
6	B			11.5962	50.628	0.674318	0.0547487	0.809964	0.00848783	0.700395	0.0223584	Modellparzelle
6	B			11.5963	50.628	0.725646	0.0157321	0.812377	0.00729669	0.668666	0.030466	Modellparzelle
6	B			11.5961	50.6281	0.675001	0.0381348	0.801838	0.00867107	0.679824	0.0198283	Modellparzelle
6	B			11.5962	50.6281	0.660231	0.100291	0.810401	0.00744239	0.71078	0.019813	Modellparzelle
6	B			11.5963	50.628	0.724655	0.0190198	0.815122	0.00778738	0.690004	0.0314818	Modellparzelle
6	B			11.5961	50.6281	0.668581	0.0456964	0.800459	0.00887637	0.677091	0.0258627	Modellparzelle
6	B			11.5962	50.6281	0.673867	0.0640681	0.810413	0.006933	0.700083	0.0228422	Modellparzelle
6	B			11.5963	50.6281	0.721211	0.0182657	0.816013	0.00713954	0.691885	0.0257216	Modellparzelle
6	B			11.5961	50.6281	0.67228	0.0458967	0.805277	0.0115483	0.686127	0.0248274	Modellparzelle
6	B			11.5962	50.6281	0.690588	0.0494199	0.81335	0.00932792	0.709475	0.0208138	Modellparzelle
6	B			11.5963	50.6281	0.709155	0.0324784	0.81758	0.0062967	0.686731	0.0262082	Modellparzelle
6	B			11.5961	50.6281	0.685819	0.0360795	0.811219	0.00857953	0.707243	0.0207607	Modellparzelle
6	B			11.5962	50.6281	0.711612	0.0184455	0.816716	0.00999595	0.710158	0.026326	Modellparzelle
6	B			11.5963	50.6281	0.712772	0.0172191	0.815069	0.00649902	0.685201	0.0193504	Modellparzelle
6	B			11.5961	50.6281	0.694839	0.0360969	0.809469	0.00822207	0.712329	0.0207126	Modellparzelle
6	B			11.5962	50.6281	0.712489	0.0216567	0.820017	0.00881011	0.708861	0.0245766	Modellparzelle
6	B			11.5963	50.6281	0.709334	0.026151	0.813941	0.00674279	0.688123	0.0208839	Modellparzelle
6	B			11.5961	50.6281	0.710119	0.0210169	0.810655	0.00793322	0.702972	0.0193158	Modellparzelle
6	B			11.5962	50.6281	0.702879	0.0339479	0.821098	0.00668746	0.710504	0.0241521	Modellparzelle
6	B			11.5963	50.6281	0.711094	0.0241004	0.815385	0.00595269	0.700313	0.0181318	Modellparzelle
6	B			11.5961	50.6281	0.702515	0.0291926	0.811586	0.00811151	0.697331	0.0193452	Modellparzelle
6	B			11.5962	50.6281	0.699334	0.0284795	0.818643	0.00716883	0.71736	0.0233574	Modellparzelle
6	B			11.5963	50.6281	0.711979	0.0236934	0.816658	0.00670641	0.703049	0.0207099	Modellparzelle
6	B			11.5961	50.6282	0.679756	0.0480331	0.808706	0.00877106	0.691719	0.0216793	Modellparzelle
6	B			11.5962	50.6281	0.700113	0.0193864	0.81663	0.00815085	0.720059	0.0177193	Modellparzelle
6	B			11.5964	50.6281	0.712826	0.0274126	0.817059	0.00739078	0.691429	0.0210262	Modellparzelle
6	B			11.5961	50.6282	0.680319	0.0474308	0.811356	0.011279	0.683984	0.0239387	Modellparzelle
6	B			11.5963	50.6282	0.686204	0.0360955	0.813994	0.00849578	0.723109	0.0184417	Modellparzelle
6	B			11.5964	50.6281	0.722273	0.0229943	0.819237	0.0053045	0.693318	0.023188	Modellparzelle
6	B			11.5961	50.6282	0.670879	0.0535137	0.804691	0.0144333	0.685811	0.0234674	Modellparzelle
6	B			11.5963	50.6282	0.687255	0.047371	0.812485	0.010921	0.706777	0.0223917	Modellparzelle
6	B			11.5964	50.6282	0.719977	0.0180896	0.817243	0.00659015	0.714866	0.0247155	Modellparzelle
6	B			11.5962	50.6282	0.670276	0.0470397	0.802657	0.0170936	0.68396	0.0200608	Modellparzelle
6	B			11.5963	50.6282	0.708978	0.030821	0.815517	0.0132992	0.72311	0.0216731	Modellparzelle
6	B			11.5964	50.6282	0.715338	0.0265151	0.816746	0.00592036	0.720379	0.0206521	Modellparzelle
6	B			11.5962	50.6282	0.692032	0.0398309	0.806805	0.0112854	0.694152	0.0190378	Modellparzelle
6	B			11.5963	50.6282	0.704107	0.0374019	0.814464	0.00928317	0.714321	0.0198402	Modellparzelle
6	B			11.5964	50.6282	0.718429	0.0226928	0.814697	0.00647578	0.704616	0.0271136	Modellparzelle
6	B			11.5962	50.6282	0.703653	0.0283848	0.808584	0.0157088	0.701662	0.0280113	Modellparzelle
6	B			11.5963	50.6282	0.697344	0.033804	0.81363	0.00841068	0.713699	0.0190206	Modellparzelle
6	B			11.5964	50.6282	0.717151	0.0203035	0.814074	0.00570898	0.707827	0.0184917	Modellparzelle
6	B			11.5962	50.6282	0.705516	0.0376211	0.808454	0.0122559	0.685378	0.028774	Modellparzelle
6	B			11.5963	50.6282	0.680559	0.0526617	0.809394	0.00894095	0.704412	0.0205705	Modellparzelle
6	B			11.5964	50.6282	0.717059	0.0162427	0.812191	0.00510736	0.703335	0.0176283	Modellparzelle
6	B			11.5962	50.6282	0.699434	0.0307422	0.812264	0.0113747	0.702504	0.0215932	Modellparzelle
6	B			11.5963	50.6282	0.677526	0.0550132	0.811731	0.0078313	0.71461	0.0216578	Modellparzelle
6	B			11.5964	50.6282	0.718596	0.0157713	0.812523	0.00677551	0.705856	0.0230883	Modellparzelle
6	B			11.5962	50.6283	0.697525	0.0343787	0.812446	0.0110951	0.706599	0.0201093	Modellparzelle
6	B			11.5963	50.6283	0.687094	0.0460368	0.811561	0.00811112	0.714849	0.0213762	Modellparzelle
6	B			11.5964	50.6282	0.723696	0.014595	0.814283	0.00799173	0.706594	0.0274737	Modellparzelle
6	B			11.5962	50.6283	0.692979	0.0307858	0.811728	0.00793402	0.709659	0.0211102	Modellparzelle
6	B			11.5963	50.6283	0.693595	0.0396131	0.810056	0.0087473	0.707833	0.0189485	Modellparzelle
6	B			11.5964	50.6283	0.728375	0.0094794	0.817109	0.00636452	0.704414	0.0267992	Modellparzelle
6	B			11.5962	50.6283	0.706146	0.0193445	0.805076	0.0071131	0.700197	0.0141742	Modellparzelle
6	B			11.5963	50.6283	0.71088	0.0248603	0.809896	0.010069	0.703094	0.0183139	Modellparzelle
6	B			11.5964	50.6283	0.731885	0.0119579	0.814142	0.00653958	0.694807	0.02937	Modellparzelle
6	B			11.5962	50.6283	0.695309	0.0305761	0.803387	0.00605961	0.699531	0.0149199	Modellparzelle
6	B			11.5963	50.6283	0.717791	0.0237749	0.811725	0.00950789	0.712452	0.0224219	Modellparzelle
6	B			11.5964	50.6283	0.728257	0.0158924	0.818379	0.0069679	0.707918	0.034948	Modellparzelle
6	B			11.5962	50.6283	0.71006	0.0229709	0.805913	0.00815745	0.70033	0.015254	Modellparzelle
6	B			11.5963	50.6283	0.724688	0.0140526	0.813955	0.00815307	0.71248	0.0196988	Modellparzelle
6	B			11.5964	50.6283	0.731255	0.0137618	0.822049	0.00570393	0.70138	0.0267517	Modellparzelle
6	B			11.5962	50.6283	0.717489	0.016641	0.811872	0.00596576	0.697723	0.0201167	Modellparzelle
6	B			11.5963	50.6283	0.721188	0.0261083	0.815869	0.00658466	0.704065	0.0305786	Modellparzelle
6	B			11.5964	50.6283	0.729129	0.0230611	0.820539	0.0064541	0.705192	0.0301156	Modellparzelle
6	B			11.5962	50.6283	0.722533	0.0161236	0.815719	0.005578	0.690826	0.0229181	Modellparzelle
6	B			11.5963	50.6283	0.716676	0.0256419	0.817679	0.00695927	0.701263	0.0237631	Modellparzelle
6	B			11.5964	50.6283	0.724058	0.022865	0.820022	0.00653069	0.697597	0.0306095	Modellparzelle
6	B			11.5962	50.6284	0.719172	0.0171263	0.820839	0.00686716	0.701769	0.026103	Modellparzelle
6	B			11.5963	50.6283	0.719058	0.024233	0.817588	0.00837562	0.71072	0.0175568	Modellparzelle
6	B			11.5964	50.6283	0.730603	0.0100686	0.820523	0.00582674	0.701712	0.0263996	Modellparzelle
6	B			11.5962	50.6284	0.696431	0.0365432	0.817849	0.0107119	0.707703	0.0236453	Modellparzelle
6	B			11.5963	50.6284	0.724692	0.0179838	0.819265	0.00760832	0.71198	0.0241174	Modellparzelle
6	B			11.5964	50.6283	0.734858	0.00932963	0.820966	0.00640392	0.698294	0.025015	Modellparzelle
6	B			11.5962	50.6284	0.715827	0.0238829	0.819568	0.00887037	0.706473	0.0209785	Modellparzelle
6	B			11.5963	50.6284	0.726595	0.0145499	0.821018	0.00662997	0.718214	0.021567	Modellparzelle
6	B			11.5964	50.6284	0.731085	0.013071	0.821487	0.00508073	0.702501	0.0292619	Modellparzelle
6	B			11.5962	50.6284	0.704799	0.0366747	0.81994	0.00771924	0.702479	0.0182755	Modellparzelle
6	B			11.5963	50.6284	0.721235	0.0164452	0.821064	0.0071999	0.713307	0.0212551	Modellparzelle
6	B			11.5964	50.6284	0.725727	0.013923	0.82	0.00516226	0.700895	0.020624	Modellparzelle
6	B			11.5962	50.6284	0.710554	0.0252823	0.818811	0.00621361	0.720347	0.0205164	Modellparzelle
6	B			11.5963	50.6284	0.713365	0.0204269	0.819751	0.00674755	0.722676	0.0228834	Modellparzelle
6	B			11.5964	50.6284	0.728917	0.0114333	0.817706	0.00668304	0.699399	0.0245627	Modellparzelle
6	B			11.5962	50.6284	0.712446	0.0192214	0.81883	0.00574255	0.712199	0.0172039	Modellparzelle
6	B			11.5963	50.6284	0.71167	0.0256072	0.818185	0.00707125	0.721365	0.0326878	Modellparzelle
6	B			11.5964	50.6284	0.723976	0.0165803	0.817974	0.00778871	0.703542	0.037076	Modellparzelle
6	B			11.5962	50.6284	0.708937	0.0216965	0.816604	0.00598975	0.713925	0.0212795	Modellparzelle
6	B			11.5963	50.6284	0.713327	0.029301	0.819909	0.00686541	0.724318	0.0263129	Modellparzelle
6	B			11.5964	50.6284	0.718505	0.0238914	0.817828	0.00633421	0.694295	0.0369295	Modellparzelle
6	B			11.5962	50.6284	0.715244	0.0218992	0.815026	0.00687866	0.706058	0.0182264	Modellparzelle
6	B			11.5963	50.6284	0.716334	0.0145489	0.819857	0.00658622	0.720136	0.0209593	Modellparzelle
6	B			11.5964	50.6284	0.72472	0.0152937	0.819331	0.00519284	0.705066	0.0332724	Modellparzelle
6	B			11.5962	50.6285	0.712704	0.0201839	0.81342	0.00570353	0.70538	0.0205207	Modellparzelle
6	B			11.5963	50.6285	0.71743	0.0157298	0.820335	0.00617688	0.717624	0.022385	Modellparzelle
6	B			11.5964	50.6284	0.724354	0.0134054	0.815521	0.00691162	0.713154	0.030855	Modellparzelle
6	B			11.5962	50.6285	0.709122	0.0217524	0.813801	0.00582912	0.696028	0.0286894	Modellparzelle
6	B			11.5963	50.6285	0.714426	0.0213829	0.819047	0.0061713	0.717369	0.0301416	Modellparzelle
6	B			11.5964	50.6285	0.728338	0.0109389	0.814546	0.00781356	0.707506	0.0311007	Modellparzelle
6	B			11.5962	50.6285	0.705133	0.0255646	0.811607	0.00671015	0.690411	0.0240534	Modellparzelle
6	B			11.5963	50.6285	0.720157	0.0156483	0.818137	0.00677989	0.719702	0.023317	Modellparzelle
6	B			11.5964	50.6285	0.725346	0.0132992	0.81333	0.00755757	0.701646	0.0294883	Modellparzelle
6	B			11.5962	50.6285	0.709388	0.0220244	0.808612	0.00727482	0.676518	0.0231788	Modellparzelle
6	B			11.5963	50.6285	0.717848	0.0131938	0.815555	0.00769232	0.713782	0.0315485	Modellparzelle
6	B			11.5964	50.6285	0.728691	0.0103412	0.814012	0.00829144	0.696704	0.0296093	Modellparzelle
6	B			11.5962	50.6285	0.707429	0.0279466	0.80581	0.00686272	0.673429	0.023126	Modellparzelle
6	B			11.5963	50.6285	0.713988	0.0307363	0.814823	0.00610407	0.72127	0.0231747	Modellparzelle
6	B			11.5964	50.6285	0.730968	0.0105983	0.818985	0.00718346	0.71057	0.0282394	Modellparzelle
6	B			11.5962	50.6285	0.717993	0.0216864	0.806521	0.00653812	0.663767	0.0207436	Modellparzelle
6	B			11.5963	50.6285	0.718607	0.0214476	0.813294	0.00764839	0.710152	0.0217016	Modellparzelle
6	B			11.5964	50.6285	0.729693	0.0131521	0.820528	0.00598788	0.709591	0.0226902	Modellparzelle
6	B			11.5962	50.6285	0.717041	0.016875	0.809924	0.00597659	0.680152	0.0175814	Modellparzelle
6	B			11.5963	50.6285	0.722004	0.0209935	0.818813	0.00760502	0.717576	0.0219722	Modellparzelle
6	B			11.5964	50.6285	0.733608	0.00841499	0.822045	0.00537582	0.714394	0.0265256	Modellparzelle
6	B			11.5962	50.6286	0.717872	0.0159088	0.81316	0.00616344	0.69349	0.0158419	Modellparzelle
6	B			11.5963	50.6285	0.722051	0.0238103	0.820508	0.00656679	0.714713	0.0261389	Modellparzelle
6	B			11.5964	50.6285	0.727079	0.0224902	0.821702	0.00469938	0.702938	0.0269954	Modellparzelle
6	B			11.5962	50.6286	0.717368	0.0179275	0.815885	0.00472648	0.694069	0.0240896	Modellparzelle
6	B			11.5963	50.6286	0.719657	0.0235225	0.819256	0.00574386	0.716447	0.0212655	Modellparzelle
6	B			11.5964	50.6286	0.730362	0.00974661	0.821325	0.00475511	0.716253	0.0183498	Modellparzelle
6	B			11.5962	50.6286	0.719044	0.0173301	0.812887	0.00976993	0.676563	0.0388985	Modellparzelle
6	B			11.5963	50.6286	0.7179	0.0278071	0.818549	0.00589482	0.726354	0.0224758	Modellparzelle
6	B			11.5964	50.6286	0.727374	0.0116297	0.818902	0.00672244	0.703065	0.0273143	Modellparzelle
6	B			11.5962	50.6286	0.719109	0.0238618	0.81391	0.00638408	0.677269	0.0209145	Modellparzelle
6	B			11.5963	50.6286	0.722803	0.0150424	0.816408	0.00838512	0.712677	0.0278484	Modellparzelle
6	B			11.5964	50.6286	0.729581	0.0102902	0.819543	0.00549134	0.693241	0.0312649	Modellparzelle
6	B			11.5962	50.6286	0.715647	0.0225156	0.817769	0.00588427	0.694919	0.0237006	Modellparzelle
6	B			11.5963	50.6286	0.720421	0.0172556	0.819212	0.00657296	0.718833	0.0198882	Modellparzelle
6	B			11.5964	50.6286	0.730536	0.0110623	0.816886	0.00679145	0.697349	0.0254468	Modellparzelle
6	B			11.5962	50.6286	0.711669	0.0281895	0.819862	0.00686698	0.699082	0.0173025	Modellparzelle
6	B			11.5963	50.6286	0.723864	0.0142557	0.818497	0.00578722	0.720857	0.0169321	Modellparzelle
6	B			11.5964	50.6286	0.726463	0.0105423	0.816991	0.00606955	0.696163	0.0282957	Modellparzelle
6	B			11.5962	50.6286	0.719672	0.0189057	0.822594	0.00619345	0.695114	0.0222316	Modellparzelle
6	B			11.5963	50.6286	0.717962	0.0235609	0.816534	0.00452514	0.714041	0.0152544	Modellparzelle
6	B			11.5964	50.6286	0.723793	0.0148916	0.815415	0.00633038	0.694671	0.0244893	Modellparzelle
6	B			11.5962	50.6287	0.716458	0.027553	0.819916	0.00890272	0.694198	0.026455	Modellparzelle
6	B			11.5963	50.6286	0.717864	0.0187208	0.818925	0.00515457	0.711427	0.0178776	Modellparzelle
6	B			11.5964	50.6286	0.727922	0.0110652	0.815432	0.00669455	0.708841	0.0240586	Modellparzelle
6	B			11.5962	50.6287	0.719484	0.020735	0.818841	0.00561165	0.685762	0.023985	Modellparzelle
6	B			11.5963	50.6287	0.71105	0.0274025	0.8178	0.00635256	0.717574	0.0205313	Modellparzelle
6	B			11.5964	50.6286	0.724868	0.0101288	0.815316	0.00682371	0.708283	0.0242377	Modellparzelle
6	B			11.5962	50.6287	0.714993	0.0197829	0.816888	0.00749176	0.674062	0.0225621	Modellparzelle
6	B			11.5963	50.6287	0.703776	0.0450983	0.819046	0.00792998	0.727462	0.0175758	Modellparzelle
6	B			11.5964	50.6287	0.718053	0.0170633	0.816497	0.0101421	0.704468	0.0207496	Modellparzelle
6	B			11.5962	50.6287	0.711196	0.0217174	0.818695	0.00646479	0.6747	0.0289708	Modellparzelle
6	B			11.5963	50.6287	0.709997	0.0289506	0.819321	0.00826363	0.720265	0.024971	Modellparzelle
6	B			11.5964	50.6287	0.718156	0.0151208	0.822358	0.00591418	0.699871	0.0183511	Modellparzelle
6	B			11.5962	50.6287	0.702808	0.028762	0.816657	0.00601091	0.676932	0.0313872	Modellparzelle
6	B			11.5963	50.6287	0.691726	0.0408059	0.819566	0.00652926	0.715763	0.0269707	Modellparzelle
6	B			11.5964	50.6287	0.720369	0.0172639	0.824635	0.00508359	0.699812	0.0237777	Modellparzelle
6	B			11.5962	50.6287	0.71361	0.0211651	0.819355	0.00584746	0.674001	0.033538	Modellparzelle
6	B			11.5963	50.6287	0.668652	0.0605943	0.816913	0.00726851	0.698927	0.0288657	Modellparzelle
6	B			11.5964	50.6287	0.723946	0.0138923	0.821896	0.0056845	0.698328	0.0293266	Modellparzelle
6	B			11.5962	50.6287	0.720647	0.0128783	0.821366	0.00707768	0.685512	0.0328371	Modellparzelle
6	B			11.5963	50.6287	0.68943	0.0493808	0.814446	0.0072729	0.686469	0.0305299	Modellparzelle
6	B			11.5964	50.6287	0.729073	0.00998074	0.820957	0.00451351	0.697598	0.0279897	Modellparzelle
6	B			11.5962	50.6287	0.709809	0.019645	0.822562	0.00630041	0.698956	0.0256443	Modellparzelle
6	B			11.5963	50.6287	0.685561	0.0481964	0.815444	0.00776719	0.689865	0.0211889	Modellparzelle
6	B			11.5964	50.6287	0.730171	0.0116616	0.821587	0.00523468	0.695773	0.0288934	Modellparzelle
6	B			11.5962	50.6288	0.707501	0.0193732	0.81905	0.00734457	0.693769	0.0232528	Modellparzelle
6	B			11.5963	50.6287	0.696331	0.0323385	0.815436	0.007481	0.684896	0.0278985	Modellparzelle
6	B			11.5964	50.6287	0.734553	0.0130835	0.823484	0.00548267	0.696799	0.022599	Modellparzelle
6	B			11.5962	50.6288	0.705803	0.0232628	0.817333	0.00743447	0.701355	0.0169057	Modellparzelle
6	B			11.5963	50.6288	0.697221	0.0403507	0.815031	0.0073605	0.686432	0.026424	Modellparzelle
6	B			11.5964	50.6288	0.73033	0.0190087	0.823038	0.00609105	0.709372	0.0220322	Modellparzelle
6	B			11.5962	50.6288	0.713591	0.0168042	0.819884	0.0058018	0.704748	0.0262511	Modellparzelle
6	B			11.5963	50.6288	0.708884	0.0257576	0.816208	0.00821978	0.693598	0.0234033	Modellparzelle
6	B			11.5964	50.6288	0.735581	0.0107338	0.82272	0.00697353	0.701949	0.0297224	Modellparzelle
6	B			11.5962	50.6288	0.715067	0.0198275	0.824685	0.00597798	0.700455	0.0309635	Modellparzelle
6	B			11.5963	50.6288	0.71166	0.0368736	0.815113	0.00579945	0.686393	0.0199299	Modellparzelle
6	B			11.5964	50.6288	0.736427	0.00854284	0.818342	0.0106266	0.7124	0.0232247	Modellparzelle
6	B			11.5962	50.6288	0.713678	0.01616	0.826511	0.00558466	0.720325	0.0281919	Modellparzelle
6	B			11.5963	50.6288	0.70722	0.0242657	0.815929	0.00498317	0.691163	0.0275979	Modellparzelle
6	B			11.5964	50.6288	0.734805	0.00911667	0.813928	0.00698228	0.689979	0.0281986	Modellparzelle
6	B			11.5962	50.6288	0.715476	0.022415	0.821232	0.00601292	0.700622	0.0243586	Modellparzelle
6	B			11.5963	50.6288	0.707789	0.0446384	0.816064	0.00719597	0.692771	0.0214241	Modellparzelle
6	B			11.5964	50.6288	0.732686	0.0131917	0.815458	0.00609123	0.683581	0.0344493	Modellparzelle
6	B			11.5962	50.6288	0.722223	0.0114092	0.823767	0.00582926	0.713977	0.019276	Modellparzelle
6	B			11.5963	50.6288	0.71895	0.0259777	0.820848	0.0054764	0.707265	0.0167612	Modellparzelle
6	B			11.5964	50.6288	0.731629	0.0152852	0.815609	0.00545642	0.689016	0.0267391	Modellparzelle
6	B			11.5962	50.6289	0.725183	0.0152035	0.823984	0.00593473	0.698217	0.0273968	Modellparzelle
6	B			11.5963	50.6288	0.71421	0.0283195	0.821897	0.00482277	0.705308	0.0201685	Modellparzelle
6	B			11.5964	50.6288	0.726654	0.0171064	0.816287	0.00626871	0.692472	0.0276527	Modellparzelle
6	B			11.5962	50.6289	0.722045	0.0138616	0.824743	0.00588415	0.702983	0.0303125	Modellparzelle
6	B			11.5963	50.6289	0.706723	0.0480738	0.819724	0.00655712	0.706042	0.0169002	Modellparzelle
6	B			11.5964	50.6288	0.729952	0.013132	0.818531	0.00561241	0.700005	0.0193875	Modellparzelle
6	B			11.5962	50.6289	0.714713	0.0305027	0.821382	0.00554741	0.701884	0.0356255	Modellparzelle
6	B			11.5963	50.6289	0.706522	0.0371216	0.820499	0.00519627	0.716396	0.0222435	Modellparzelle
6	B			11.5964	50.6289	0.730081	0.018109	0.818304	0.00525255	0.686687	0.0225933	Modellparzelle
6	B			11.5962	50.6289	0.718791	0.014177	0.819573	0.00576364	0.70461	0.0233826	Modellparzelle
6	B			11.5963	50.6289	0.708587	0.0280042	0.819385	0.00575442	0.713688	0.0198133	Modellparzelle
6	B			11.5964	50.6289	0.727921	0.014824	0.820683	0.0047392	0.70036	0.0197443	Modellparzelle
6	B			11.5962	50.6289	0.717826	0.0146291	0.81965	0.00636376	0.715735	0.0185067	Modellparzelle
6	B			11.5963	50.6289	0.713771	0.0207521	0.819701	0.00600983	0.709118	0.0225819	Modellparzelle
6	B			11.5964	50.6289	0.726261	0.0202437	0.820066	0.00570027	0.692075	0.0217189	Modellparzelle
6	B			11.5962	50.6289	0.717813	0.0153772	0.817806	0.00599629	0.716065	0.0250019	Modellparzelle
6	B			11.5963	50.6289	0.714216	0.0229206	0.821281	0.00617285	0.708023	0.0174086	Modellparzelle
6	B			11.5964	50.6289	0.716965	0.0293313	0.820079	0.00555784	0.693916	0.0204217	Modellparzelle
6	B			11.5962	50.6289	0.702882	0.0333633	0.815671	0.00723341	0.716542	0.0218718	Modellparzelle
6	B			11.5963	50.6289	0.711957	0.0220617	0.820599	0.00487999	0.715044	0.0164511	Modellparzelle
6	B			11.5964	50.6289	0.710401	0.0438968	0.820302	0.00474315	0.711897	0.0208933	Modellparzelle
6	B			11.5962	50.6289	0.685262	0.0393861	0.81605	0.00872576	0.722597	0.0160337	Modellparzelle
6	B			11.5963	50.6289	0.699108	0.0425296	0.820229	0.00646951	0.723768	0.0188548	Modellparzelle
6	B			11.5964	50.6289	0.722953	0.012234	0.820164	0.00547077	0.722293	0.0136482	Modellparzelle
6	B			11.5962	50.629	0.615128	0.0734028	0.805592	0.0143527	0.713076	0.0179766	Modellparzelle
6	B			11.5963	50.629	0.688833	0.0578199	0.821763	0.0053153	0.730189	0.0155505	Modellparzelle
6	B			11.5964	50.6289	0.712198	0.034279	0.82062	0.006377	0.726639	0.0166505	Modellparzelle
6	B			11.5962	50.629	0.537963	0.104791	0.779434	0.0171768	0.707991	0.0205339	Modellparzelle
6	B			11.5963	50.629	0.665475	0.0612012	0.816162	0.00950029	0.72623	0.0172572	Modellparzelle
6	B			11.5964	50.629	0.711787	0.0334876	0.8183	0.00695563	0.720632	0.0224705	Modellparzelle
6	B			11.5962	50.629	0.450853	0.149103	0.756729	0.0330409	0.713122	0.0441196	Modellparzelle
6	B			11.5963	50.629	0.643026	0.0700216	0.808962	0.0145065	0.727734	0.0152793	Modellparzelle
6	B			11.5964	50.629	0.709221	0.0321939	0.81529	0.00713891	0.724707	0.0170597	Modellparzelle
6	B			11.5962	50.629	0.371434	0.165603	0.730648	0.0461553	0.730549	0.046788	Modellparzelle
6	B			11.5963	50.629	0.657457	0.057774	0.803905	0.0232907	0.718612	0.0190111	Modellparzelle
6	B			11.5964	50.629	0.701086	0.052692	0.815413	0.00812106	0.721793	0.0146378	Modellparzelle
6	B			11.5962	50.629	0.248661	0.145624	0.694561	0.0682218	0.766333	0.046165	Modellparzelle
6	B			11.5963	50.629	0.686411	0.0389585	0.809511	0.0168545	0.706986	0.0204896	Modellparzelle
6	B			11.5964	50.629	0.724221	0.0193396	0.820445	0.00456498	0.712583	0.0251522	Modellparzelle
6	B			11.5962	50.629	0.361603	0.143782	0.685342	0.0573574	0.751869	0.0554905	Modellparzelle
6	B			11.5963	50.629	0.691407	0.0474171	0.807941	0.0235234	0.717634	0.0210855	Modellparzelle
6	B			11.5964	50.629	0.728606	0.022595	0.822693	0.00541076	0.699786	0.0262333	Modellparzelle
6	B			11.5962	50.629	0.561215	0.104059	0.715827	0.0302994	0.70475	0.0658978	Modellparzelle
6	B			11.5963	50.629	0.684371	0.0425869	0.797449	0.0389883	0.705123	0.0221396	Modellparzelle
6	B			11.5964	50.629	0.736579	0.0220522	0.824425	0.00494403	0.707772	0.0205075	Modellparzelle
6	B			11.5962	50.6291	0.66519	0.0470162	0.746672	0.0338593	0.684188	0.0349521	Modellparzelle
6	B			11.5963	50.629	0.685287	0.0422495	0.807034	0.0273315	0.694062	0.0227895	Modellparzelle
6	B			11.5964	50.629	0.731603	0.0195326	0.821792	0.00552583	0.696308	0.0238565	Modellparzelle
6	B			11.5962	50.6291	0.687336	0.0433287	0.780946	0.0205988	0.6755	0.0271247	Modellparzelle
6	B			11.5963	50.6291	0.68966	0.0405317	0.812743	0.0101989	0.681692	0.0228623	Modellparzelle
6	B			11.5964	50.6291	0.735038	0.0124834	0.821152	0.00591547	0.691691	0.0256715	Modellparzelle
6	B			11.5962	50.6291	0.681927	0.0439438	0.800396	0.0113521	0.672079	0.0217269	Modellparzelle
6	B			11.5963	50.6291	0.685499	0.0507706	0.814256	0.0075757	0.669174	0.0282441	Modellparzelle
6	B			11.5964	50.6291	0.72832	0.0153871	0.818873	0.00585516	0.690204	0.031035	Modellparzelle
6	B			11.5962	50.6291	0.667024	0.05102	0.801633	0.00959187	0.683741	0.0269855	Modellparzelle
6	B			11.5963	50.6291	0.661933	0.0643159	0.808422	0.00800145	0.646984	0.0262108	Modellparzelle
6	B			11.5964	50.6291	0.717643	0.0242693	0.816844	0.00504511	0.698473	0.0207098	Modellparzelle
6	B			11.5962	50.6291	0.683089	0.0646077	0.802961	0.0120769	0.705637	0.0169804	Modellparzelle
6	B			11.5963	50.6291	0.65652	0.0755802	0.81031	0.00822579	0.655222	0.0299185	Modellparzelle
6	B			11.5964	50.6291	0.715895	0.0281858	0.813224	0.00786209	0.67574	0.0374257	Modellparzelle
6	B			11.5962	50.6291	0.689192	0.0562713	0.808726	0.0130843	0.69316	0.0269411	Modellparzelle
6	B			11.5963	50.6291	0.67246	0.0694199	0.816251	0.00559033	0.667273	0.0350195	Modellparzelle
6	B			11.5964	50.6291	0.715521	0.0206307	0.818626	0.00664265	0.678284	0.0331847	Modellparzelle
6	B			11.5962	50.6291	0.695067	0.0405616	0.818248	0.00787193	0.707526	0.0186943	Modellparzelle
6	B			11.5963	50.6291	0.656282	0.0822682	0.816909	0.00699398	0.666072	0.0448654	Modellparzelle
6	B			11.5964	50.6291	0.714623	0.02243	0.817883	0.00769512	0.679728	0.03621	Modellparzelle
6	B			11.5962	50.6292	0.656573	0.088888	0.818282	0.00780214	0.707853	0.0190345	Modellparzelle
6	B			11.5963	50.6291	0.678213	0.0559057	0.819886	0.00736242	0.672492	0.0365652	Modellparzelle
6	B			11.5964	50.6291	0.705371	0.031713	0.815984	0.00776297	0.677797	0.0361906	Modellparzelle
1	B			11.5958	50.6277	0.680749	0.045456	0.802055	0.00617784	0.634534	0.0241802	Modellparzelle
1	B			11.5957	50.6277	0.685867	0.0440094	0.790142	0.0112164	0.639097	0.0313853	Modellparzelle
1	B			11.5956	50.6277	0.693866	0.0319246	0.797702	0.00686822	0.65615	0.0249919	Modellparzelle
1	B			11.5956	50.6277	0.697758	0.0279117	0.798742	0.00951323	0.664502	0.0302924	Modellparzelle
1	B			11.5957	50.6277	0.671109	0.0503517	0.795396	0.00924023	0.644138	0.0352238	Modellparzelle
1	B			11.5958	50.6277	0.678283	0.0522452	0.804633	0.00631836	0.647868	0.0229927	Modellparzelle
1	B			11.5956	50.6277	0.695481	0.0282306	0.801618	0.00703244	0.669361	0.0307773	Modellparzelle
1	B			11.5957	50.6277	0.638782	0.083136	0.792489	0.00823696	0.640004	0.0280046	Modellparzelle
1	B			11.5958	50.6277	0.669093	0.0551194	0.805753	0.00687905	0.658126	0.0200931	Modellparzelle
1	B			11.5956	50.6277	0.703872	0.0233472	0.799828	0.00804119	0.66687	0.0285169	Modellparzelle
1	B			11.5957	50.6277	0.636422	0.0675312	0.793212	0.00854324	0.640708	0.0304217	Modellparzelle
1	B			11.5958	50.6277	0.685719	0.0483279	0.807892	0.00600327	0.655008	0.0200189	Modellparzelle
1	B			11.5956	50.6278	0.705375	0.0210805	0.801408	0.00829851	0.670898	0.0281159	Modellparzelle
1	B			11.5957	50.6278	0.627391	0.0812352	0.793735	0.00702532	0.628097	0.0323635	Modellparzelle
1	B			11.5958	50.6277	0.698958	0.0321361	0.806079	0.0062799	0.659424	0.0241421	Modellparzelle
1	B			11.5956	50.6278	0.696691	0.0321698	0.797168	0.0083104	0.656124	0.0298866	Modellparzelle
1	B			11.5957	50.6278	0.637054	0.0856767	0.795037	0.00841221	0.620178	0.0435723	Modellparzelle
1	B			11.5959	50.6278	0.695477	0.03682	0.809846	0.00552703	0.665634	0.0224679	Modellparzelle
1	B			11.5956	50.6278	0.701198	0.0246112	0.794485	0.0105488	0.655745	0.0329221	Modellparzelle
1	B			11.5957	50.6278	0.658176	0.0707946	0.802153	0.00716291	0.643536	0.0300695	Modellparzelle
1	B			11.5959	50.6278	0.694547	0.0300753	0.809691	0.0059213	0.65977	0.0209581	Modellparzelle
1	B			11.5956	50.6278	0.695746	0.0267817	0.79392	0.0127444	0.655339	0.0340199	Modellparzelle
1	B			11.5958	50.6278	0.660999	0.0612996	0.80538	0.00757184	0.644184	0.027522	Modellparzelle
1	B			11.5959	50.6278	0.667274	0.0510287	0.807989	0.00626115	0.658722	0.0269447	Modellparzelle
1	B			11.5957	50.6278	0.698596	0.0294517	0.799318	0.012383	0.663576	0.0330156	Modellparzelle
1	B			11.5958	50.6278	0.617493	0.0840453	0.806171	0.00827144	0.644278	0.0206557	Modellparzelle
1	B			11.5959	50.6278	0.686169	0.0488871	0.805652	0.00723492	0.654429	0.0319612	Modellparzelle
1	B			11.5957	50.6278	0.704679	0.0278874	0.802171	0.00975681	0.668072	0.0327032	Modellparzelle
1	B			11.5958	50.6278	0.647691	0.0769006	0.806869	0.00617926	0.644597	0.0283701	Modellparzelle
1	B			11.5959	50.6278	0.691676	0.044252	0.808171	0.00668586	0.668135	0.0197612	Modellparzelle
1	B			11.5957	50.6278	0.700537	0.0391081	0.800824	0.010385	0.653741	0.0368746	Modellparzelle
1	B			11.5958	50.6278	0.631698	0.0749174	0.798992	0.00839411	0.638343	0.0363144	Modellparzelle
1	B			11.5959	50.6278	0.697059	0.0440468	0.811461	0.00542672	0.668101	0.0242329	Modellparzelle
1	B			11.5957	50.6279	0.699619	0.0318393	0.801514	0.00797491	0.655892	0.0385698	Modellparzelle
1	B			11.5958	50.6278	0.621853	0.0870354	0.795122	0.00777986	0.630538	0.0457146	Modellparzelle
1	B			11.5959	50.6278	0.704067	0.0351919	0.813386	0.00538863	0.687469	0.0263558	Modellparzelle
1	B			11.5957	50.6279	0.681245	0.0403122	0.800296	0.00753093	0.643371	0.0549259	Modellparzelle
1	B			11.5958	50.6279	0.588438	0.118726	0.790921	0.0112439	0.622636	0.0535689	Modellparzelle
1	B			11.5959	50.6279	0.709296	0.0302473	0.817033	0.00664372	0.700034	0.0257928	Modellparzelle
1	B			11.5957	50.6279	0.669227	0.0465328	0.798114	0.00759666	0.639408	0.0483302	Modellparzelle
1	B			11.5958	50.6279	0.614395	0.117684	0.79517	0.0120235	0.6086	0.0520357	Modellparzelle
1	B			11.5959	50.6279	0.719164	0.0213392	0.818389	0.00521833	0.699128	0.0269135	Modellparzelle
1	B			11.5957	50.6279	0.670453	0.0581437	0.78987	0.0107751	0.621541	0.0416123	Modellparzelle
1	B			11.5958	50.6279	0.618938	0.0873509	0.799939	0.00941675	0.615557	0.0510711	Modellparzelle
1	B			11.5959	50.6279	0.709554	0.0200102	0.814676	0.00590489	0.69958	0.0259098	Modellparzelle
1	B			11.5957	50.6279	0.67821	0.0582656	0.790734	0.0143049	0.622656	0.0448652	Modellparzelle
1	B			11.5958	50.6279	0.605976	0.0782941	0.800788	0.00694673	0.617646	0.0337443	Modellparzelle
1	B			11.5959	50.6279	0.68619	0.0441093	0.81073	0.00623413	0.685068	0.0224762	Modellparzelle
1	B			11.5957	50.6279	0.671092	0.054289	0.79292	0.0194394	0.624249	0.0382292	Modellparzelle
1	B			11.5958	50.6279	0.585916	0.102098	0.797082	0.00833239	0.610536	0.0481569	Modellparzelle
1	B			11.5959	50.6279	0.693544	0.0383452	0.810904	0.00648279	0.672903	0.0241386	Modellparzelle
1	B			11.5957	50.6279	0.666011	0.0671985	0.796501	0.0132503	0.635181	0.0502513	Modellparzelle
1	B			11.5958	50.6279	0.534624	0.127951	0.792168	0.0101103	0.597498	0.055489	Modellparzelle
1	B			11.5959	50.6279	0.694931	0.036979	0.808407	0.00621473	0.678937	0.0220392	Modellparzelle
1	B			11.5957	50.6279	0.647718	0.0830057	0.796609	0.0100548	0.630332	0.0519495	Modellparzelle
1	B			11.5958	50.6279	0.53497	0.118991	0.791039	0.0087282	0.585154	0.0505227	Modellparzelle
1	B			11.5959	50.6279	0.691059	0.0321508	0.808392	0.00623712	0.676398	0.0237246	Modellparzelle
1	B			11.5957	50.628	0.652771	0.0668294	0.796781	0.0101127	0.641347	0.0397679	Modellparzelle
1	B			11.5958	50.628	0.539811	0.128931	0.789442	0.0100564	0.582435	0.0531991	Modellparzelle
1	B			11.5959	50.6279	0.674669	0.0512296	0.808082	0.00617984	0.676274	0.0190809	Modellparzelle
1	B			11.5957	50.628	0.627117	0.0864527	0.792791	0.00896917	0.639765	0.040728	Modellparzelle
1	B			11.5958	50.628	0.59882	0.0730391	0.791582	0.00796863	0.603863	0.0419153	Modellparzelle
1	B			11.5959	50.628	0.675057	0.0450705	0.808324	0.006761	0.672113	0.0243503	Modellparzelle
1	B			11.5957	50.628	0.624308	0.0802407	0.788149	0.0115915	0.653881	0.0284227	Modellparzelle
1	B			11.5958	50.628	0.552926	0.100194	0.792137	0.00715634	0.615063	0.0345823	Modellparzelle
1	B			11.5959	50.628	0.675336	0.0368944	0.80719	0.00684146	0.66095	0.0282022	Modellparzelle
1	B			11.5957	50.628	0.632379	0.0939473	0.781893	0.0196671	0.66556	0.021192	Modellparzelle
1	B			11.5958	50.628	0.499382	0.130993	0.783618	0.0113571	0.588735	0.0541244	Modellparzelle
1	B			11.5959	50.628	0.670758	0.0438573	0.802385	0.00806556	0.660228	0.0240387	Modellparzelle
1	B			11.5957	50.628	0.6478	0.057471	0.761489	0.0277604	0.653246	0.0213127	Modellparzelle
1	B			11.5958	50.628	0.428426	0.167854	0.760396	0.0209996	0.593169	0.0427187	Modellparzelle
1	B			11.5959	50.628	0.664064	0.05531	0.801623	0.00821437	0.659548	0.0225507	Modellparzelle
1	B			11.5957	50.628	0.616517	0.0648369	0.723512	0.034903	0.627459	0.0274679	Modellparzelle
1	B			11.5958	50.628	0.38483	0.148104	0.688699	0.0468938	0.593933	0.0392674	Modellparzelle
1	B			11.5959	50.628	0.632559	0.0854805	0.798971	0.00965284	0.650896	0.0290246	Modellparzelle
1	B			11.5957	50.628	0.641493	0.0610221	0.729982	0.0478633	0.617246	0.0397166	Modellparzelle
1	B			11.5958	50.628	0.42007	0.149115	0.726395	0.0359003	0.587697	0.0507007	Modellparzelle
1	B			11.5959	50.628	0.6663	0.0555715	0.801085	0.0112762	0.636445	0.0310425	Modellparzelle
1	B			11.5957	50.6281	0.649321	0.0761907	0.785584	0.0196066	0.649156	0.038218	Modellparzelle
1	B			11.5958	50.628	0.477537	0.144325	0.775969	0.0180291	0.595018	0.0420495	Modellparzelle
1	B			11.5959	50.628	0.674231	0.0477357	0.808546	0.00788778	0.651526	0.0223307	Modellparzelle
1	B			11.5957	50.6281	0.648151	0.0734441	0.799707	0.0144801	0.662478	0.0339911	Modellparzelle
1	B			11.5958	50.6281	0.505776	0.13139	0.793164	0.0110334	0.590854	0.0437351	Modellparzelle
1	B			11.5959	50.628	0.679653	0.0428583	0.812034	0.00684783	0.668313	0.0246109	Modellparzelle
1	B			11.5957	50.6281	0.670106	0.0462294	0.804691	0.00808746	0.676136	0.0256919	Modellparzelle
1	B			11.5958	50.6281	0.560512	0.105618	0.797999	0.0103785	0.591243	0.0427584	Modellparzelle
1	B			11.596	50.6281	0.664305	0.0580205	0.812573	0.00653543	0.661723	0.0249828	Modellparzelle
1	B			11.5957	50.6281	0.664627	0.0691882	0.804477	0.0105004	0.6752	0.0221183	Modellparzelle
1	B			11.5958	50.6281	0.602064	0.0817332	0.8004	0.00971518	0.608805	0.0466951	Modellparzelle
1	B			11.596	50.6281	0.648905	0.090302	0.811883	0.00454135	0.648291	0.0263814	Modellparzelle
1	B			11.5957	50.6281	0.693709	0.0421015	0.809415	0.00724156	0.666427	0.0354706	Modellparzelle
1	B			11.5959	50.6281	0.565827	0.109736	0.806983	0.00738285	0.616638	0.0462458	Modellparzelle
1	B			11.596	50.6281	0.664545	0.0558684	0.814113	0.00542952	0.663113	0.023198	Modellparzelle
1	B			11.5958	50.6281	0.69665	0.0533164	0.816144	0.00634883	0.67674	0.0293398	Modellparzelle
1	B			11.5959	50.6281	0.52651	0.138567	0.804889	0.00902101	0.606277	0.0493104	Modellparzelle
1	B			11.596	50.6281	0.671205	0.041722	0.815543	0.00583831	0.670611	0.025174	Modellparzelle
1	B			11.5958	50.6281	0.689888	0.0680717	0.820343	0.00622039	0.67896	0.0219901	Modellparzelle
1	B			11.5959	50.6281	0.523956	0.144492	0.790314	0.0239764	0.622939	0.0392067	Modellparzelle
1	B			11.596	50.6281	0.662859	0.0524797	0.817588	0.00533557	0.679893	0.0269216	Modellparzelle
1	B			11.5958	50.6281	0.693459	0.0709821	0.823445	0.00685142	0.676893	0.0318162	Modellparzelle
1	B			11.5959	50.6281	0.509773	0.162131	0.795726	0.0185695	0.626339	0.0343667	Modellparzelle
1	B			11.596	50.6281	0.652775	0.0524261	0.819214	0.00564342	0.678852	0.0221589	Modellparzelle
1	B			11.5958	50.6282	0.68947	0.0662725	0.821392	0.00634133	0.675831	0.0374705	Modellparzelle
1	B			11.5959	50.6282	0.508648	0.152783	0.80516	0.00939805	0.623045	0.0334038	Modellparzelle
1	B			11.596	50.6281	0.654866	0.0671002	0.815135	0.00847698	0.668932	0.0263902	Modellparzelle
1	B			11.5958	50.6282	0.701801	0.0511705	0.821932	0.00650555	0.691713	0.0348635	Modellparzelle
1	B			11.5959	50.6282	0.507677	0.14703	0.809928	0.00916814	0.631878	0.0339388	Modellparzelle
1	B			11.596	50.6282	0.659348	0.0521043	0.818797	0.00620686	0.683938	0.0236061	Modellparzelle
1	B			11.5958	50.6282	0.708172	0.0369534	0.823582	0.00595946	0.687348	0.0299813	Modellparzelle
1	B			11.5959	50.6282	0.448645	0.149442	0.804532	0.0122758	0.637404	0.0374967	Modellparzelle
1	B			11.596	50.6282	0.663357	0.0563921	0.818068	0.00638824	0.687818	0.0176013	Modellparzelle
1	B			11.5958	50.6282	0.699204	0.0512167	0.823728	0.00612572	0.671082	0.027	Modellparzelle
1	B			11.5959	50.6282	0.378425	0.173506	0.79278	0.0246134	0.62563	0.0424595	Modellparzelle
1	B			11.596	50.6282	0.657557	0.057847	0.816751	0.00658165	0.676124	0.0276414	Modellparzelle
1	B			11.5958	50.6282	0.714849	0.0398195	0.827062	0.00537687	0.675895	0.030276	Modellparzelle
1	B			11.5959	50.6282	0.310637	0.212124	0.749058	0.0649365	0.606924	0.0531373	Modellparzelle
1	B			11.596	50.6282	0.669112	0.0634175	0.818791	0.00814665	0.668364	0.0276126	Modellparzelle
1	B			11.5958	50.6282	0.687388	0.0736009	0.826767	0.00649756	0.671188	0.0322244	Modellparzelle
1	B			11.5959	50.6282	0.331126	0.203029	0.704682	0.106802	0.607	0.0664458	Modellparzelle
1	B			11.596	50.6282	0.687362	0.0451702	0.820836	0.0067884	0.668498	0.0264955	Modellparzelle
1	B			11.5958	50.6282	0.695797	0.0516757	0.826787	0.00528297	0.674093	0.0243914	Modellparzelle
1	B			11.5959	50.6282	0.363724	0.220988	0.686805	0.13309	0.581116	0.0831215	Modellparzelle
1	B			11.596	50.6282	0.685505	0.0461063	0.823668	0.00646557	0.683196	0.0228562	Modellparzelle
1	B			11.5958	50.6283	0.692	0.0604723	0.823796	0.00605343	0.670131	0.0263773	Modellparzelle
1	B			11.5959	50.6282	0.445874	0.1922	0.759276	0.0754404	0.588476	0.065871	Modellparzelle
1	B			11.596	50.6282	0.698305	0.0326686	0.826526	0.005896	0.688559	0.0299887	Modellparzelle
1	B			11.5958	50.6283	0.684618	0.0627873	0.821185	0.00690148	0.658094	0.0273447	Modellparzelle
1	B			11.5959	50.6283	0.448504	0.183232	0.767061	0.061769	0.595596	0.0486017	Modellparzelle
1	B			11.596	50.6282	0.683988	0.0475395	0.82463	0.00687941	0.682538	0.0313321	Modellparzelle
1	B			11.5958	50.6283	0.680708	0.0844514	0.820504	0.00600032	0.660483	0.0279207	Modellparzelle
1	B			11.5959	50.6283	0.445884	0.149231	0.782406	0.0373367	0.595265	0.0482466	Modellparzelle
1	B			11.596	50.6283	0.666415	0.0719157	0.82125	0.00682552	0.68193	0.0246704	Modellparzelle
1	B			11.5958	50.6283	0.688107	0.0654561	0.820618	0.00591223	0.648663	0.0309332	Modellparzelle
1	B			11.5959	50.6283	0.410948	0.153379	0.78921	0.0225787	0.579287	0.053679	Modellparzelle
1	B			11.596	50.6283	0.65817	0.071166	0.816524	0.00895014	0.665772	0.0349476	Modellparzelle
1	B			11.5958	50.6283	0.686895	0.0590083	0.820695	0.00612525	0.654213	0.0291426	Modellparzelle
1	B			11.5959	50.6283	0.380045	0.148591	0.775238	0.0320147	0.569958	0.045042	Modellparzelle
1	B			11.596	50.6283	0.667963	0.0644637	0.810973	0.0162635	0.653762	0.0283282	Modellparzelle
1	B			11.5958	50.6283	0.6945	0.0503488	0.822532	0.00725958	0.659831	0.0204691	Modellparzelle
1	B			11.5959	50.6283	0.45692	0.136257	0.792567	0.018686	0.571652	0.0391028	Modellparzelle
1	B			11.596	50.6283	0.686973	0.0506996	0.8154	0.0122681	0.671271	0.0270846	Modellparzelle
1	B			11.5958	50.6283	0.702682	0.0434979	0.823622	0.00712763	0.670072	0.0227418	Modellparzelle
1	B			11.5959	50.6283	0.583391	0.106926	0.808004	0.00872277	0.583298	0.0282833	Modellparzelle
1	B			11.596	50.6283	0.690204	0.0548663	0.820519	0.00716618	0.677806	0.0368229	Modellparzelle
1	B			11.5958	50.6283	0.710323	0.0326151	0.821336	0.00593569	0.664652	0.0198997	Modellparzelle
1	B			11.5959	50.6283	0.661726	0.0653465	0.814867	0.00699766	0.600957	0.0373061	Modellparzelle
1	B			11.596	50.6283	0.693171	0.0354227	0.818663	0.00497138	0.663963	0.0508917	Modellparzelle
1	B			11.5958	50.6284	0.713401	0.0216569	0.819512	0.0056844	0.677118	0.020221	Modellparzelle
1	B			11.5959	50.6284	0.689592	0.0475118	0.82022	0.00888437	0.628154	0.0319685	Modellparzelle
1	B			11.596	50.6283	0.698819	0.0242363	0.817133	0.00493806	0.657658	0.0365714	Modellparzelle
1	B			11.5958	50.6284	0.706195	0.0295794	0.818466	0.00637641	0.684389	0.0224019	Modellparzelle
1	B			11.5959	50.6284	0.688559	0.055892	0.822037	0.00564737	0.638628	0.0286059	Modellparzelle
1	B			11.596	50.6284	0.691264	0.0448319	0.814878	0.00610287	0.656264	0.0327128	Modellparzelle
1	B			11.5958	50.6284	0.71464	0.0210462	0.819711	0.00750675	0.69333	0.0236973	Modellparzelle
1	B			11.5959	50.6284	0.694321	0.0370585	0.820372	0.00583867	0.657123	0.0276563	Modellparzelle
1	B			11.596	50.6284	0.69094	0.0430678	0.811558	0.00555642	0.656576	0.0353766	Modellparzelle
1	B			11.5958	50.6284	0.717695	0.0235101	0.818023	0.00804866	0.700657	0.019126	Modellparzelle
1	B			11.5959	50.6284	0.695622	0.0329477	0.818372	0.00784169	0.657397	0.0366532	Modellparzelle
1	B			11.596	50.6284	0.692884	0.0397505	0.810949	0.0086381	0.653374	0.0322497	Modellparzelle
1	B			11.5958	50.6284	0.713639	0.026675	0.818671	0.00620754	0.708985	0.0182919	Modellparzelle
1	B			11.5959	50.6284	0.694795	0.0261434	0.808712	0.00788908	0.650559	0.0334931	Modellparzelle
1	B			11.596	50.6284	0.706665	0.0365091	0.813089	0.00841382	0.650786	0.0254859	Modellparzelle
1	B			11.5958	50.6284	0.717823	0.0250942	0.817494	0.00677752	0.693368	0.0220817	Modellparzelle
1	B			11.5959	50.6284	0.669069	0.0627203	0.806087	0.00668298	0.643027	0.0332558	Modellparzelle
1	B			11.596	50.6284	0.712382	0.0230709	0.817011	0.00611679	0.657442	0.0278928	Modellparzelle
1	B			11.5958	50.6284	0.7194	0.0270878	0.819669	0.00567048	0.699472	0.0198311	Modellparzelle
1	B			11.5959	50.6284	0.644167	0.0710199	0.809183	0.00581337	0.639498	0.0362884	Modellparzelle
1	B			11.596	50.6284	0.707942	0.0279315	0.816016	0.00618499	0.661688	0.0277435	Modellparzelle
1	B			11.5958	50.6285	0.714102	0.0289297	0.82041	0.00598764	0.702748	0.0274406	Modellparzelle
1	B			11.5959	50.6284	0.669578	0.0538754	0.809914	0.00594689	0.641564	0.0258639	Modellparzelle
1	B			11.596	50.6284	0.706113	0.035105	0.814987	0.0059227	0.676509	0.0234896	Modellparzelle
1	B			11.5958	50.6285	0.706694	0.03445	0.819486	0.0061697	0.716089	0.0239352	Modellparzelle
1	B			11.5959	50.6285	0.68017	0.0514694	0.806342	0.0101128	0.639441	0.0303955	Modellparzelle
1	B			11.596	50.6284	0.709472	0.0389168	0.81493	0.00535986	0.668565	0.0291309	Modellparzelle
1	B			11.5958	50.6285	0.701148	0.0466948	0.816013	0.00780376	0.708209	0.0254775	Modellparzelle
1	B			11.5959	50.6285	0.68375	0.0413888	0.80621	0.00843756	0.628307	0.0417168	Modellparzelle
1	B			11.596	50.6285	0.710311	0.0266919	0.816339	0.00682391	0.680426	0.0205105	Modellparzelle
1	B			11.5958	50.6285	0.700073	0.0499406	0.815442	0.00831624	0.699495	0.0348726	Modellparzelle
1	B			11.5959	50.6285	0.693306	0.0269609	0.802799	0.00896385	0.606994	0.0336135	Modellparzelle
1	B			11.596	50.6285	0.701925	0.0362326	0.819807	0.00719336	0.67643	0.0319686	Modellparzelle
1	B			11.5958	50.6285	0.701153	0.0419149	0.807423	0.0173242	0.693963	0.0402732	Modellparzelle
1	B			11.5959	50.6285	0.667704	0.0524058	0.802648	0.00735678	0.602805	0.0402091	Modellparzelle
1	B			11.596	50.6285	0.691531	0.0532353	0.818219	0.00593872	0.687182	0.0329349	Modellparzelle
1	B			11.5958	50.6285	0.698001	0.0431728	0.808124	0.014371	0.691368	0.0304312	Modellparzelle
1	B			11.5959	50.6285	0.667561	0.0482634	0.803711	0.00751605	0.604974	0.0511674	Modellparzelle
1	B			11.596	50.6285	0.704413	0.0457198	0.813553	0.00634417	0.684355	0.0219875	Modellparzelle
1	B			11.5958	50.6285	0.69564	0.0519384	0.81576	0.00778108	0.702349	0.0283558	Modellparzelle
1	B			11.5959	50.6285	0.671664	0.0454798	0.803313	0.00738039	0.621722	0.0333026	Modellparzelle
1	B			11.596	50.6285	0.695733	0.054174	0.81213	0.00771134	0.687388	0.0265001	Modellparzelle
1	B			11.5958	50.6285	0.708081	0.0368184	0.817922	0.0092246	0.693971	0.0317878	Modellparzelle
1	B			11.5959	50.6285	0.66382	0.0732115	0.80635	0.0079448	0.641986	0.0369898	Modellparzelle
1	B			11.5961	50.6285	0.701876	0.0364368	0.814283	0.00809608	0.67776	0.0349877	Modellparzelle
1	B			11.5958	50.6286	0.700904	0.0380611	0.819084	0.0087177	0.697103	0.0333816	Modellparzelle
1	B			11.5959	50.6286	0.683315	0.0432484	0.807942	0.0069309	0.639103	0.0465717	Modellparzelle
1	B			11.5961	50.6285	0.685652	0.0566667	0.813033	0.00688291	0.67461	0.0284341	Modellparzelle
1	B			11.5958	50.6286	0.70719	0.0296432	0.819885	0.00917922	0.689873	0.0332973	Modellparzelle
1	B			11.5959	50.6286	0.697008	0.0304407	0.809285	0.00658618	0.632435	0.0329819	Modellparzelle
1	B			11.5961	50.6286	0.704267	0.0491169	0.809751	0.00746244	0.658576	0.0387071	Modellparzelle
1	B			11.5958	50.6286	0.709016	0.0284943	0.821001	0.00878247	0.681049	0.0449948	Modellparzelle
1	B			11.596	50.6286	0.708281	0.0218768	0.811909	0.00711114	0.655463	0.037695	Modellparzelle
1	B			11.5961	50.6286	0.708296	0.0280337	0.815857	0.00548846	0.674606	0.0266452	Modellparzelle
1	B			11.5958	50.6286	0.708094	0.0382701	0.820105	0.00854698	0.676956	0.0462614	Modellparzelle
1	B			11.596	50.6286	0.704415	0.033713	0.814332	0.00757836	0.662174	0.029658	Modellparzelle
1	B			11.5961	50.6286	0.711433	0.0327669	0.817825	0.00645278	0.673341	0.0210133	Modellparzelle
1	B			11.5958	50.6286	0.705459	0.0290744	0.818886	0.00856006	0.67586	0.0314056	Modellparzelle
1	B			11.596	50.6286	0.709741	0.0265368	0.817114	0.00690479	0.656354	0.0294281	Modellparzelle
1	B			11.5961	50.6286	0.710819	0.0265021	0.81961	0.00601649	0.68478	0.0221507	Modellparzelle
1	B			11.5958	50.6286	0.710137	0.0279408	0.8215	0.00675122	0.685211	0.0255233	Modellparzelle
1	B			11.596	50.6286	0.708819	0.0210182	0.816495	0.00656077	0.659133	0.0372402	Modellparzelle
1	B			11.5961	50.6286	0.707628	0.0303016	0.820936	0.00456937	0.684245	0.0196173	Modellparzelle
1	B			11.5958	50.6286	0.712872	0.0250116	0.818235	0.00785142	0.666419	0.0282869	Modellparzelle
1	B			11.596	50.6286	0.702466	0.0326461	0.813754	0.00882852	0.653968	0.0430836	Modellparzelle
1	B			11.5961	50.6286	0.701854	0.0386751	0.82098	0.00503051	0.677173	0.0303287	Modellparzelle
1	B			11.5959	50.6287	0.706263	0.0264926	0.818454	0.00946261	0.677417	0.0328394	Modellparzelle
1	B			11.596	50.6286	0.705248	0.0275807	0.813575	0.00833238	0.657039	0.037551	Modellparzelle
1	B			11.5961	50.6286	0.707925	0.0473088	0.821296	0.00644345	0.674023	0.0355705	Modellparzelle
1	B			11.5959	50.6287	0.709358	0.0275238	0.817124	0.00866399	0.69097	0.0251003	Modellparzelle
1	B			11.596	50.6287	0.712691	0.0249014	0.814655	0.00976257	0.666345	0.0405515	Modellparzelle
1	B			11.5961	50.6287	0.711949	0.0344726	0.821565	0.00588547	0.703441	0.0230474	Modellparzelle
1	B			11.5959	50.6287	0.706771	0.0264255	0.81445	0.00849863	0.693044	0.0286794	Modellparzelle
1	B			11.596	50.6287	0.70504	0.0389972	0.818778	0.00608095	0.681914	0.0277869	Modellparzelle
1	B			11.5961	50.6287	0.715537	0.0258855	0.822711	0.00528005	0.711882	0.0197732	Modellparzelle
1	B			11.5959	50.6287	0.706626	0.0244103	0.817135	0.00664133	0.700893	0.0219799	Modellparzelle
1	B			11.596	50.6287	0.715498	0.0239318	0.815196	0.00643628	0.667385	0.0238113	Modellparzelle
1	B			11.5961	50.6287	0.706317	0.0408716	0.822499	0.00645544	0.697971	0.0211603	Modellparzelle
1	B			11.5959	50.6287	0.707915	0.0325784	0.817894	0.00696733	0.700293	0.0255393	Modellparzelle
1	B			11.596	50.6287	0.699724	0.0459387	0.815532	0.00755362	0.673815	0.0227898	Modellparzelle
1	B			11.5961	50.6287	0.711414	0.022221	0.818971	0.00767253	0.693355	0.025761	Modellparzelle
1	B			11.5959	50.6287	0.715272	0.022256	0.821418	0.00693286	0.707035	0.0211039	Modellparzelle
1	B			11.596	50.6287	0.705975	0.0268936	0.813607	0.00706791	0.682664	0.0273472	Modellparzelle
1	B			11.5961	50.6287	0.718717	0.0168635	0.817704	0.00909152	0.696168	0.0234413	Modellparzelle
1	B			11.5959	50.6287	0.708624	0.0256108	0.819527	0.00631777	0.703519	0.0275828	Modellparzelle
1	B			11.596	50.6287	0.709046	0.0277063	0.81218	0.00817563	0.676903	0.0352251	Modellparzelle
1	B			11.5961	50.6287	0.717783	0.0224101	0.822398	0.00515385	0.704609	0.0207301	Modellparzelle
1	B			11.5959	50.6288	0.715542	0.0228781	0.818088	0.00672283	0.704893	0.0201815	Modellparzelle
1	B			11.596	50.6287	0.703054	0.0384982	0.809513	0.00965224	0.670147	0.0342704	Modellparzelle
1	B			11.5961	50.6287	0.72275	0.0179188	0.821585	0.0067175	0.695384	0.0218861	Modellparzelle
1	B			11.5959	50.6288	0.708896	0.0243764	0.816926	0.00800837	0.685895	0.0326691	Modellparzelle
1	B			11.596	50.6288	0.685664	0.0583352	0.810559	0.010734	0.674223	0.0258541	Modellparzelle
1	B			11.5961	50.6287	0.718595	0.0172464	0.822348	0.00511984	0.698968	0.0219454	Modellparzelle
1	B			11.5959	50.6288	0.710533	0.0322757	0.818846	0.00594003	0.683167	0.0228961	Modellparzelle
1	B			11.596	50.6288	0.68969	0.0564497	0.806409	0.0143127	0.675547	0.0278785	Modellparzelle
1	B			11.5961	50.6288	0.718109	0.0183933	0.818263	0.00636254	0.68798	0.0315871	Modellparzelle
1	B			11.5959	50.6288	0.712421	0.0225198	0.815674	0.00734104	0.686189	0.020586	Modellparzelle
1	B			11.596	50.6288	0.707104	0.024903	0.814892	0.00620328	0.691073	0.0207379	Modellparzelle
1	B			11.5961	50.6288	0.718737	0.0181745	0.81754	0.00946092	0.700599	0.018535	Modellparzelle
1	B			11.5959	50.6288	0.696242	0.0333852	0.812477	0.00761986	0.685769	0.0240566	Modellparzelle
1	B			11.596	50.6288	0.701927	0.0286208	0.808384	0.00764372	0.679542	0.0209522	Modellparzelle
1	B			11.5961	50.6288	0.72206	0.0137741	0.81584	0.0105702	0.689076	0.0220118	Modellparzelle
1	B			11.5959	50.6288	0.695515	0.0315317	0.812903	0.00654026	0.681735	0.0247124	Modellparzelle
1	B			11.596	50.6288	0.708999	0.0280238	0.810185	0.00715017	0.687465	0.0202228	Modellparzelle
1	B			11.5961	50.6288	0.717424	0.0221069	0.822805	0.00537229	0.704084	0.0181146	Modellparzelle
1	B			11.5959	50.6288	0.693896	0.0305882	0.810848	0.00653754	0.675482	0.031891	Modellparzelle
1	B			11.596	50.6288	0.708041	0.0267745	0.809327	0.00816888	0.679109	0.0268998	Modellparzelle
1	B			11.5961	50.6288	0.717969	0.0158406	0.819505	0.00542192	0.70664	0.0205115	Modellparzelle
1	B			11.5959	50.6288	0.686775	0.0393005	0.806917	0.00854676	0.662638	0.0333114	Modellparzelle
1	B			11.596	50.6288	0.69179	0.0607713	0.806662	0.0083984	0.67468	0.0296039	Modellparzelle
1	B			11.5961	50.6288	0.713007	0.0259155	0.818754	0.00611815	0.713033	0.0198728	Modellparzelle
1	B			11.5959	50.6289	0.69079	0.0384383	0.805458	0.0101257	0.670938	0.0279471	Modellparzelle
1	B			11.596	50.6288	0.700636	0.0282645	0.804525	0.0108494	0.682794	0.0347063	Modellparzelle
1	B			11.5961	50.6288	0.718549	0.0195028	0.819749	0.00579373	0.715705	0.0281468	Modellparzelle
1	B			11.5959	50.6289	0.695028	0.0368381	0.807602	0.00678294	0.673655	0.0207211	Modellparzelle
1	B			11.596	50.6289	0.684694	0.0522121	0.8082	0.00863511	0.688961	0.0259639	Modellparzelle
1	B			11.5961	50.6289	0.718809	0.0167926	0.821193	0.00676091	0.721622	0.0214601	Modellparzelle
1	B			11.5959	50.6289	0.69773	0.0260487	0.807085	0.00691643	0.675764	0.024817	Modellparzelle
1	B			11.596	50.6289	0.690067	0.038093	0.809128	0.00797448	0.685292	0.0232808	Modellparzelle
1	B			11.5961	50.6289	0.724368	0.0146186	0.8204	0.0062148	0.718971	0.0245621	Modellparzelle
1	B			11.5959	50.6289	0.698743	0.0311033	0.808638	0.00869291	0.693013	0.0265442	Modellparzelle
1	B			11.596	50.6289	0.701461	0.024893	0.807414	0.0093907	0.68835	0.0295885	Modellparzelle
1	B			11.5961	50.6289	0.717826	0.0164494	0.822847	0.00614174	0.724579	0.0307556	Modellparzelle
1	B			11.5959	50.6289	0.695229	0.0513017	0.814819	0.0069374	0.713843	0.0306853	Modellparzelle
1	B			11.596	50.6289	0.68442	0.0420559	0.808784	0.00911701	0.688129	0.0263986	Modellparzelle
1	B			11.5961	50.6289	0.718818	0.0191294	0.824482	0.00717055	0.735286	0.023392	Modellparzelle
1	B			11.5959	50.6289	0.716878	0.0220582	0.819697	0.00671657	0.731043	0.0218124	Modellparzelle
1	B			11.596	50.6289	0.683455	0.0521419	0.810387	0.0104938	0.686541	0.0290615	Modellparzelle
1	B			11.5961	50.6289	0.719522	0.019146	0.824171	0.00701083	0.732818	0.0197984	Modellparzelle
1	B			11.5959	50.6289	0.717984	0.0279148	0.822154	0.00642655	0.738806	0.021978	Modellparzelle
1	B			11.596	50.6289	0.675355	0.0628336	0.812913	0.00927905	0.704771	0.026356	Modellparzelle
1	B			11.5961	50.6289	0.699652	0.0474484	0.823636	0.00779639	0.729532	0.0216978	Modellparzelle
1	B			11.5959	50.629	0.727585	0.0236036	0.822496	0.00600049	0.735723	0.0236277	Modellparzelle
1	B			11.596	50.6289	0.65303	0.0659626	0.814015	0.00803899	0.71899	0.0195225	Modellparzelle
1	B			11.5961	50.6289	0.696408	0.0424857	0.824342	0.00712266	0.737423	0.0168746	Modellparzelle
1	B			11.5959	50.629	0.726078	0.017554	0.824446	0.00565379	0.739588	0.020654	Modellparzelle
1	B			11.596	50.629	0.645346	0.104402	0.818414	0.00726765	0.731381	0.0216192	Modellparzelle
1	B			11.5961	50.6289	0.666359	0.0438193	0.824215	0.00679654	0.747663	0.015396	Modellparzelle
1	B			11.5959	50.629	0.730334	0.0169755	0.824263	0.00665169	0.736098	0.0217749	Modellparzelle
1	B			11.596	50.629	0.667417	0.0650616	0.820571	0.00601403	0.734322	0.0169379	Modellparzelle
1	B			11.5961	50.629	0.605599	0.0870231	0.821535	0.00637215	0.7514	0.0212204	Modellparzelle
1	B			11.5959	50.629	0.730061	0.0173672	0.824261	0.00775409	0.731851	0.021008	Modellparzelle
1	B			11.596	50.629	0.610385	0.152138	0.818164	0.00811912	0.738263	0.0328066	Modellparzelle
1	B			11.5961	50.629	0.5523	0.109424	0.815612	0.00632366	0.758291	0.0228634	Modellparzelle
1	B			11.5959	50.629	0.736686	0.0120753	0.824677	0.00674236	0.725223	0.0247779	Modellparzelle
1	B			11.596	50.629	0.563313	0.202422	0.817923	0.00978915	0.748522	0.0343918	Modellparzelle
1	B			11.5961	50.629	0.575856	0.138773	0.810799	0.00824083	0.746719	0.0269219	Modellparzelle
1	B			11.5959	50.629	0.729223	0.0198616	0.82486	0.00745093	0.733216	0.0231691	Modellparzelle
1	B			11.596	50.629	0.527045	0.226364	0.816226	0.0115979	0.746789	0.0386458	Modellparzelle
1	B			11.5961	50.629	0.583234	0.150709	0.812484	0.0106228	0.737342	0.0251993	Modellparzelle
1	B			11.5959	50.629	0.735309	0.0126932	0.824279	0.00750542	0.738455	0.019777	Modellparzelle
1	B			11.596	50.629	0.472958	0.264044	0.813397	0.0156161	0.741737	0.0444701	Modellparzelle
1	B			11.5961	50.629	0.631788	0.114273	0.815098	0.0119809	0.734283	0.0238966	Modellparzelle
1	B			11.5959	50.6291	0.733459	0.0129107	0.821629	0.00728147	0.72648	0.0277503	Modellparzelle
1	B			11.596	50.629	0.607687	0.153326	0.815162	0.0157056	0.725149	0.03184	Modellparzelle
1	B			11.5961	50.629	0.634503	0.0845717	0.812275	0.0112985	0.73039	0.0252805	Modellparzelle
1	B			11.5959	50.6291	0.729117	0.0183206	0.821853	0.00689601	0.73399	0.0196912	Modellparzelle
1	B			11.596	50.6291	0.678359	0.0808935	0.823287	0.00844218	0.737121	0.0190489	Modellparzelle
1	B			11.5961	50.629	0.647991	0.0926044	0.806517	0.023947	0.713612	0.0407493	Modellparzelle
1	B			11.5959	50.6291	0.728749	0.0165624	0.820467	0.00719356	0.731999	0.0258656	Modellparzelle
1	B			11.596	50.6291	0.659114	0.112084	0.822986	0.00679099	0.738394	0.0227844	Modellparzelle
1	B			11.5961	50.6291	0.664578	0.0556263	0.80087	0.0301609	0.700548	0.0478871	Modellparzelle
1	B			11.5959	50.6291	0.732914	0.0166347	0.821891	0.00672482	0.726269	0.0262194	Modellparzelle
1	B			11.596	50.6291	0.657062	0.0982134	0.818813	0.00654591	0.736344	0.0201982	Modellparzelle
1	B			11.5961	50.6291	0.667673	0.0624092	0.808897	0.0107089	0.718486	0.023772	Modellparzelle
1	B			11.5959	50.6291	0.72846	0.0215241	0.819351	0.00793609	0.70655	0.0396784	Modellparzelle
1	B			11.596	50.6291	0.667484	0.111806	0.815506	0.0143099	0.720855	0.0230678	Modellparzelle
1	B			11.5961	50.6291	0.650877	0.0903986	0.802779	0.00848781	0.720638	0.0225137	Modellparzelle
1	B			11.5959	50.6291	0.731054	0.0173298	0.82035	0.00702959	0.723142	0.0238327	Modellparzelle
1	B			11.596	50.6291	0.665988	0.0978172	0.809281	0.0163216	0.713092	0.023708	Modellparzelle
1	B			11.5961	50.6291	0.675611	0.0594065	0.791539	0.0126359	0.719974	0.0220134	Modellparzelle
1	B			11.5959	50.6291	0.725929	0.0180305	0.818312	0.00841293	0.721163	0.0265446	Modellparzelle
1	B			11.596	50.6291	0.684299	0.06903	0.811639	0.013226	0.707986	0.0291596	Modellparzelle
1	B			11.5961	50.6291	0.654629	0.0944988	0.78351	0.0180862	0.714603	0.0259192	Modellparzelle
1	B			11.5959	50.6291	0.716022	0.0239471	0.818862	0.00721494	0.722203	0.0268038	Modellparzelle
1	B			11.596	50.6291	0.682758	0.0879564	0.814161	0.00972611	0.686871	0.0347368	Modellparzelle
1	B			11.5961	50.6291	0.695331	0.0506366	0.799205	0.0175385	0.724212	0.0229441	Modellparzelle
1	B			11.5958	50.6292	0.70277	0.0365579	0.817452	0.0064153	0.714042	0.0287979	Modellparzelle
1	B			11.596	50.6292	0.703497	0.0522455	0.814884	0.010064	0.689128	0.0369301	Modellparzelle
1	B			11.5961	50.6291	0.695694	0.0552077	0.818355	0.00808836	0.722424	0.0289533	Modellparzelle
1	B			11.5958	50.6292	0.702762	0.0285198	0.816112	0.00649438	0.707581	0.0314038	Modellparzelle
1	B			11.596	50.6292	0.715001	0.0328743	0.818196	0.00660976	0.695586	0.0260114	Modellparzelle
1	B			11.5961	50.6292	0.669331	0.0835583	0.819051	0.00737124	0.718616	0.034751	Modellparzelle
1	B			11.5958	50.6292	0.692404	0.0457967	0.814496	0.00793675	0.702668	0.0371761	Modellparzelle
1	B			11.596	50.6292	0.719617	0.0259637	0.818681	0.00673273	0.701982	0.0253072	Modellparzelle
1	B			11.5961	50.6292	0.679869	0.0623864	0.82001	0.00665598	0.723497	0.0223247	Modellparzelle
5	A			11.5951	50.6279	0.721709	0.0195656	0.819412	0.00508041	0.709915	0.0227063	Modellparzelle
5	A			11.595	50.6279	0.712906	0.0290079	0.814495	0.00587732	0.707956	0.0205384	Modellparzelle
5	A			11.5949	50.6279	0.689679	0.0486035	0.810409	0.00672406	0.710383	0.0184788	Modellparzelle
5	A			11.5951	50.6279	0.718379	0.0359904	0.8177	0.00619706	0.710044	0.0204465	Modellparzelle
5	A			11.595	50.6279	0.707067	0.029313	0.814117	0.00564348	0.705211	0.018529	Modellparzelle
5	A			11.5949	50.6279	0.695032	0.0425518	0.811686	0.00608827	0.712607	0.0208515	Modellparzelle
5	A			11.5951	50.6279	0.719738	0.0154866	0.815428	0.005999	0.706903	0.018864	Modellparzelle
5	A			11.595	50.6279	0.704803	0.0267129	0.814232	0.00680221	0.704688	0.019349	Modellparzelle
5	A			11.5949	50.6279	0.707103	0.028525	0.814201	0.00603748	0.708531	0.0204831	Modellparzelle
5	A			11.5951	50.6279	0.719342	0.0154297	0.814427	0.00566603	0.711819	0.0194377	Modellparzelle
5	A			11.595	50.6279	0.715515	0.0296828	0.815755	0.00583383	0.693758	0.0240253	Modellparzelle
5	A			11.5949	50.6279	0.709481	0.0288521	0.81502	0.00682844	0.704573	0.0176299	Modellparzelle
5	A			11.5951	50.6279	0.721206	0.0160892	0.814023	0.00763374	0.702653	0.0319638	Modellparzelle
5	A			11.595	50.6279	0.719302	0.0197236	0.817538	0.00588654	0.705332	0.0200816	Modellparzelle
5	A			11.5949	50.6279	0.69741	0.0451136	0.814501	0.00655878	0.706011	0.0166253	Modellparzelle
5	A			11.5951	50.6278	0.718188	0.0193143	0.815065	0.00609853	0.698391	0.0278878	Modellparzelle
5	A			11.595	50.6279	0.717994	0.0206199	0.819302	0.00589082	0.700008	0.0235341	Modellparzelle
5	A			11.5949	50.6279	0.700977	0.0376564	0.813271	0.00690419	0.708018	0.0222354	Modellparzelle
5	A			11.5951	50.6278	0.725244	0.0137714	0.818246	0.00556803	0.713271	0.0249707	Modellparzelle
5	A			11.595	50.6278	0.720958	0.0232253	0.819024	0.00504141	0.701344	0.0227464	Modellparzelle
5	A			11.5949	50.6279	0.705364	0.031306	0.810972	0.00641878	0.706586	0.0184981	Modellparzelle
5	A			11.5951	50.6278	0.724927	0.0194824	0.820668	0.00517406	0.723096	0.0278005	Modellparzelle
5	A			11.595	50.6278	0.715171	0.0185656	0.817622	0.00542848	0.714798	0.018296	Modellparzelle
5	A			11.5949	50.6278	0.709775	0.0288548	0.812421	0.00613936	0.701766	0.0198565	Modellparzelle
5	A			11.5951	50.6278	0.727086	0.0188088	0.820606	0.00616331	0.712105	0.0247982	Modellparzelle
5	A			11.595	50.6278	0.710337	0.0255005	0.815941	0.00585751	0.728952	0.0160826	Modellparzelle
5	A			11.5949	50.6278	0.717341	0.016537	0.813442	0.00501338	0.711789	0.0197838	Modellparzelle
5	A			11.5951	50.6278	0.733987	0.0125676	0.822812	0.00486672	0.700892	0.0253621	Modellparzelle
5	A			11.595	50.6278	0.712297	0.0240335	0.814428	0.00518483	0.708086	0.025283	Modellparzelle
5	A			11.5949	50.6278	0.716005	0.0230111	0.815673	0.00569648	0.721581	0.0167395	Modellparzelle
5	A			11.5951	50.6278	0.735124	0.0121295	0.824178	0.00582736	0.707993	0.0290824	Modellparzelle
5	A			11.595	50.6278	0.716724	0.0170811	0.814288	0.0054921	0.707752	0.0211452	Modellparzelle
5	A			11.5949	50.6278	0.718357	0.0189782	0.813464	0.0063587	0.710306	0.0218338	Modellparzelle
5	A			11.5951	50.6278	0.728473	0.0146481	0.821678	0.00650304	0.721049	0.02289	Modellparzelle
5	A			11.595	50.6278	0.706181	0.0364139	0.815785	0.0050453	0.710575	0.0192029	Modellparzelle
5	A			11.5949	50.6278	0.702671	0.0338776	0.81295	0.00706972	0.720795	0.018527	Modellparzelle
5	A			11.5951	50.6278	0.723555	0.0167726	0.815702	0.00669991	0.722257	0.028198	Modellparzelle
5	A			11.595	50.6278	0.71577	0.0312296	0.812664	0.00566067	0.693142	0.0234354	Modellparzelle
5	A			11.5949	50.6278	0.692754	0.0322453	0.807612	0.00685078	0.720432	0.0171299	Modellparzelle
5	A			11.5949	50.6279	0.688122	0.0409083	0.810548	0.00590479	0.71669	0.0209814	Modellparzelle
5	A			11.595	50.6279	0.715983	0.0238137	0.817588	0.00534487	0.71486	0.0214394	Modellparzelle
5	A			11.5951	50.6279	0.722069	0.0130439	0.816735	0.00651315	0.701354	0.0247348	Modellparzelle
5	A			11.5949	50.628	0.693897	0.0429272	0.80834	0.0068751	0.720749	0.0214432	Modellparzelle
5	A			11.595	50.628	0.709628	0.0242418	0.817612	0.00592874	0.71235	0.0210151	Modellparzelle
5	A			11.5951	50.6279	0.716093	0.0163575	0.814075	0.00632366	0.715624	0.0231842	Modellparzelle
5	A			11.5949	50.628	0.701309	0.0333999	0.808412	0.00764057	0.697823	0.0307793	Modellparzelle
5	A			11.595	50.628	0.711618	0.0297022	0.819301	0.00557595	0.716965	0.0220914	Modellparzelle
5	A			11.5952	50.628	0.711194	0.0201113	0.812979	0.00540211	0.717474	0.0195202	Modellparzelle
5	A			11.5949	50.628	0.698612	0.0365129	0.809743	0.00936527	0.708514	0.023591	Modellparzelle
5	A			11.595	50.628	0.69907	0.0412387	0.817336	0.00541255	0.722836	0.0167731	Modellparzelle
5	A			11.5952	50.628	0.709382	0.0265367	0.814949	0.00516876	0.720326	0.0202706	Modellparzelle
5	A			11.5949	50.628	0.699938	0.0445021	0.813275	0.0076076	0.706123	0.0284792	Modellparzelle
5	A			11.5951	50.628	0.678842	0.0674289	0.811765	0.00668516	0.719374	0.0236456	Modellparzelle
5	A			11.5952	50.628	0.707845	0.031081	0.812522	0.00616255	0.711719	0.0255692	Modellparzelle
5	A			11.595	50.628	0.699231	0.032219	0.812531	0.00588195	0.711923	0.0227805	Modellparzelle
5	A			11.5951	50.628	0.692095	0.042678	0.812704	0.00556464	0.726159	0.018039	Modellparzelle
5	A			11.5952	50.628	0.715526	0.0184218	0.815235	0.00520669	0.716479	0.0172974	Modellparzelle
5	A			11.595	50.628	0.698385	0.0350955	0.810638	0.00607497	0.712911	0.0272569	Modellparzelle
5	A			11.5951	50.628	0.692415	0.0590269	0.814461	0.00621348	0.723373	0.019692	Modellparzelle
5	A			11.5952	50.628	0.71279	0.0271326	0.815166	0.00552549	0.720103	0.0187106	Modellparzelle
5	A			11.595	50.628	0.691614	0.0397752	0.809598	0.0069188	0.716135	0.0222265	Modellparzelle
5	A			11.5951	50.628	0.710084	0.0345411	0.815365	0.00667659	0.715339	0.0252859	Modellparzelle
5	A			11.5952	50.628	0.720579	0.0152903	0.814059	0.00612917	0.723008	0.0133741	Modellparzelle
5	A			11.595	50.6281	0.689913	0.0452934	0.806774	0.00694348	0.714763	0.021118	Modellparzelle
5	A			11.5951	50.628	0.706872	0.0391704	0.817053	0.00607554	0.717512	0.0241377	Modellparzelle
5	A			11.5952	50.628	0.718057	0.020202	0.813973	0.00569761	0.712703	0.0192358	Modellparzelle
5	A			11.595	50.6281	0.692896	0.0420809	0.808842	0.00715034	0.722964	0.0270254	Modellparzelle
5	A			11.5951	50.6281	0.720133	0.0257734	0.819114	0.00681932	0.723906	0.0179698	Modellparzelle
5	A			11.5952	50.628	0.709643	0.0266256	0.811395	0.00608561	0.711156	0.0163343	Modellparzelle
5	A			11.595	50.6281	0.693293	0.0439269	0.809262	0.00664856	0.726144	0.0156263	Modellparzelle
5	A			11.5951	50.6281	0.71899	0.029277	0.819288	0.00555408	0.727746	0.0234049	Modellparzelle
5	A			11.5952	50.6281	0.722074	0.0160926	0.814596	0.00591091	0.713123	0.0196311	Modellparzelle
5	A			11.595	50.6281	0.700576	0.0346904	0.812359	0.00678538	0.721761	0.025792	Modellparzelle
5	A			11.5951	50.6281	0.71018	0.0287728	0.816968	0.00619481	0.721306	0.0248015	Modellparzelle
5	A			11.5952	50.6281	0.722875	0.0165552	0.812964	0.00556938	0.699484	0.021501	Modellparzelle
5	A			11.595	50.6281	0.720904	0.0132352	0.815605	0.00524326	0.725033	0.0214215	Modellparzelle
5	A			11.5951	50.6281	0.703636	0.0358264	0.81595	0.0056814	0.72369	0.0186867	Modellparzelle
5	A			11.5952	50.6281	0.720373	0.0174805	0.813348	0.00537649	0.707564	0.0190767	Modellparzelle
5	A			11.595	50.6281	0.717808	0.0219592	0.816861	0.00496949	0.715256	0.0220871	Modellparzelle
5	A			11.5951	50.6281	0.711224	0.0250072	0.814483	0.00737476	0.716021	0.0297861	Modellparzelle
5	A			11.5952	50.6281	0.717983	0.0192694	0.813036	0.00588465	0.727363	0.0167739	Modellparzelle
5	A			11.595	50.6281	0.714124	0.0226027	0.816008	0.00468456	0.718447	0.0241126	Modellparzelle
5	A			11.5951	50.6281	0.709918	0.0356991	0.812749	0.00705494	0.707726	0.0242788	Modellparzelle
5	A			11.5952	50.6281	0.717161	0.0154121	0.810438	0.00596641	0.73376	0.0172357	Modellparzelle
5	A			11.595	50.6281	0.71794	0.0179198	0.81749	0.00499031	0.719653	0.0255767	Modellparzelle
5	A			11.5951	50.6281	0.711094	0.0344762	0.811528	0.00698082	0.711644	0.026213	Modellparzelle
5	A			11.5952	50.6281	0.702327	0.0304107	0.808837	0.00664855	0.720928	0.0205927	Modellparzelle
5	A			11.595	50.6282	0.701795	0.0387566	0.814455	0.00733817	0.721134	0.0182451	Modellparzelle
5	A			11.5951	50.6281	0.710667	0.0264979	0.811976	0.00810447	0.699542	0.0285279	Modellparzelle
5	A			11.5952	50.6281	0.700478	0.0262026	0.809757	0.0064031	0.722638	0.0182262	Modellparzelle
5	A			11.595	50.6282	0.711289	0.0356181	0.815295	0.00873487	0.71642	0.0241381	Modellparzelle
5	A			11.5951	50.6282	0.706021	0.0229176	0.812355	0.0060495	0.7189	0.0184238	Modellparzelle
5	A			11.5952	50.6282	0.708648	0.0286494	0.811237	0.0062563	0.717931	0.0180447	Modellparzelle
5	A			11.595	50.6282	0.699645	0.0361387	0.815897	0.00593426	0.72943	0.0215507	Modellparzelle
5	A			11.5951	50.6282	0.71039	0.0169346	0.813363	0.005958	0.719963	0.0209137	Modellparzelle
5	A			11.5952	50.6282	0.715891	0.0186506	0.812481	0.00669735	0.703189	0.0246559	Modellparzelle
5	A			11.595	50.6282	0.706281	0.0210269	0.817174	0.00519175	0.738802	0.0174165	Modellparzelle
5	A			11.5951	50.6282	0.706516	0.0291582	0.813926	0.00489675	0.709175	0.0205848	Modellparzelle
5	A			11.5952	50.6282	0.721216	0.0253977	0.811264	0.00607726	0.697165	0.0267125	Modellparzelle
5	A			11.595	50.6282	0.692907	0.0399861	0.813514	0.00553958	0.739019	0.0120019	Modellparzelle
5	A			11.5951	50.6282	0.701099	0.0412276	0.814471	0.00545994	0.717696	0.0170433	Modellparzelle
5	A			11.5952	50.6282	0.716674	0.0175823	0.806682	0.00857547	0.692192	0.0335913	Modellparzelle
5	A			11.595	50.6282	0.690828	0.033939	0.813234	0.00581795	0.734182	0.0175821	Modellparzelle
5	A			11.5951	50.6282	0.70767	0.0267838	0.808836	0.0053436	0.695759	0.0322681	Modellparzelle
5	A			11.5952	50.6282	0.71862	0.0164742	0.807186	0.00573584	0.689594	0.026678	Modellparzelle
5	A			11.595	50.6282	0.685944	0.0361299	0.812705	0.00557027	0.74319	0.012347	Modellparzelle
5	A			11.5951	50.6282	0.711254	0.0207805	0.80884	0.00659773	0.701019	0.0325742	Modellparzelle
5	A			11.5952	50.6282	0.714285	0.0215913	0.80747	0.00678947	0.704408	0.0229573	Modellparzelle
5	A			11.595	50.6283	0.687792	0.0376652	0.811628	0.00665916	0.743369	0.0120605	Modellparzelle
5	A			11.5951	50.6282	0.7069	0.0202239	0.808002	0.00676267	0.697823	0.0257208	Modellparzelle
5	A			11.5952	50.6282	0.716456	0.0187741	0.812757	0.00804531	0.713435	0.0212887	Modellparzelle
5	A			11.595	50.6283	0.696725	0.0365541	0.813388	0.00544117	0.729322	0.0196147	Modellparzelle
5	A			11.5951	50.6283	0.707237	0.0241972	0.808174	0.0083834	0.697702	0.0236492	Modellparzelle
5	A			11.5952	50.6282	0.714119	0.0247659	0.812446	0.0061879	0.696859	0.0200758	Modellparzelle
5	A			11.595	50.6283	0.698832	0.0298964	0.812115	0.00546497	0.722263	0.0172287	Modellparzelle
5	A			11.5951	50.6283	0.699448	0.0299593	0.810242	0.00582313	0.703012	0.0232825	Modellparzelle
5	A			11.5952	50.6283	0.724593	0.0177588	0.811672	0.00508881	0.682282	0.0234034	Modellparzelle
5	A			11.595	50.6283	0.703498	0.0296737	0.813599	0.00614703	0.712172	0.0171509	Modellparzelle
5	A			11.5951	50.6283	0.691966	0.035878	0.810868	0.00542453	0.70966	0.0308769	Modellparzelle
5	A			11.5952	50.6283	0.724962	0.0199507	0.811072	0.00639403	0.682103	0.019439	Modellparzelle
5	A			11.595	50.6283	0.702045	0.0275409	0.815507	0.00717711	0.718105	0.0208243	Modellparzelle
5	A			11.5951	50.6283	0.707078	0.0274167	0.811202	0.00643474	0.703918	0.0311251	Modellparzelle
5	A			11.5952	50.6283	0.727597	0.0163164	0.813267	0.0057181	0.692399	0.0242743	Modellparzelle
5	A			11.595	50.6283	0.697978	0.0333441	0.814695	0.00811743	0.723552	0.0201858	Modellparzelle
5	A			11.5951	50.6283	0.713322	0.0408845	0.813254	0.00711179	0.70092	0.0361665	Modellparzelle
5	A			11.5952	50.6283	0.716524	0.0257089	0.809924	0.00521625	0.69652	0.0187523	Modellparzelle
5	A			11.595	50.6283	0.706274	0.0234457	0.816415	0.00804317	0.736565	0.0283915	Modellparzelle
5	A			11.5951	50.6283	0.723826	0.0266341	0.816141	0.00502515	0.701738	0.0286314	Modellparzelle
5	A			11.5953	50.6283	0.71268	0.0253073	0.81091	0.00660514	0.700837	0.0278376	Modellparzelle
5	A			11.595	50.6283	0.716635	0.0229988	0.817202	0.0065486	0.719216	0.0236296	Modellparzelle
5	A			11.5951	50.6283	0.718063	0.0254651	0.815823	0.00583786	0.700493	0.026371	Modellparzelle
5	A			11.5953	50.6283	0.71685	0.0152315	0.813622	0.00560725	0.715573	0.0206894	Modellparzelle
5	A			11.595	50.6284	0.709361	0.0369749	0.819289	0.00592195	0.710046	0.0258412	Modellparzelle
5	A			11.5952	50.6283	0.709048	0.0278772	0.815921	0.00523815	0.703708	0.0230991	Modellparzelle
5	A			11.5953	50.6283	0.716565	0.0155526	0.815282	0.005221	0.714455	0.0194016	Modellparzelle
5	A			11.5951	50.6284	0.728267	0.0174191	0.817002	0.0066229	0.705496	0.0332211	Modellparzelle
5	A			11.5952	50.6284	0.715868	0.0261381	0.815317	0.00551196	0.706235	0.0225246	Modellparzelle
5	A			11.5953	50.6284	0.716407	0.0158913	0.815211	0.00514547	0.712703	0.0184487	Modellparzelle
5	A			11.5951	50.6284	0.717	0.0232217	0.819728	0.00546288	0.718372	0.0210455	Modellparzelle
5	A			11.5952	50.6284	0.709394	0.036576	0.818196	0.00573284	0.718801	0.0236983	Modellparzelle
5	A			11.5953	50.6284	0.717922	0.0183005	0.814118	0.00587446	0.697545	0.0269114	Modellparzelle
5	A			11.5951	50.6284	0.718587	0.0188181	0.818165	0.00781602	0.720543	0.0245467	Modellparzelle
5	A			11.5952	50.6284	0.714439	0.0388818	0.817226	0.00632347	0.710102	0.0294117	Modellparzelle
5	A			11.5953	50.6284	0.71847	0.0263942	0.814691	0.00596362	0.692386	0.0265745	Modellparzelle
5	A			11.5951	50.6284	0.719699	0.0195138	0.819522	0.00561442	0.723875	0.022987	Modellparzelle
5	A			11.5952	50.6284	0.726668	0.0224943	0.818296	0.00653313	0.697695	0.0385597	Modellparzelle
5	A			11.5953	50.6284	0.725267	0.0190822	0.816941	0.0051172	0.70362	0.0243116	Modellparzelle
5	A			11.5951	50.6284	0.718059	0.0159438	0.818967	0.00565653	0.715107	0.0298994	Modellparzelle
5	A			11.5952	50.6284	0.726203	0.020384	0.817489	0.00775141	0.682235	0.0409049	Modellparzelle
5	A			11.5953	50.6284	0.72031	0.0220154	0.816569	0.00563536	0.69964	0.0266265	Modellparzelle
5	A			11.5951	50.6284	0.713492	0.0268327	0.816762	0.0120518	0.710437	0.0226408	Modellparzelle
5	A			11.5952	50.6284	0.732073	0.0166057	0.820997	0.0041298	0.680736	0.0303315	Modellparzelle
5	A			11.5953	50.6284	0.723729	0.017181	0.8197	0.00532979	0.709095	0.0218795	Modellparzelle
5	A			11.5951	50.6285	0.720544	0.0262652	0.820635	0.00649648	0.709011	0.0233297	Modellparzelle
5	A			11.5952	50.6284	0.734313	0.0136058	0.820642	0.00544496	0.674415	0.0267826	Modellparzelle
5	A			11.5953	50.6284	0.728384	0.00944929	0.821341	0.00570203	0.697053	0.0248274	Modellparzelle
5	A			11.5951	50.6285	0.730164	0.0123873	0.822741	0.00515327	0.714853	0.0266668	Modellparzelle
5	A			11.5952	50.6285	0.73176	0.0153644	0.822158	0.00552882	0.675829	0.04466	Modellparzelle
5	A			11.5953	50.6284	0.731628	0.00997175	0.819724	0.00585802	0.69751	0.02227	Modellparzelle
5	A			11.5951	50.6285	0.727614	0.0147954	0.819966	0.00580632	0.70075	0.0305714	Modellparzelle
5	A			11.5952	50.6285	0.72708	0.0321574	0.823408	0.00569503	0.671575	0.0422632	Modellparzelle
5	A			11.5953	50.6285	0.732033	0.00975734	0.819857	0.00545278	0.691038	0.0264417	Modellparzelle
5	A			11.5951	50.6285	0.724783	0.0219188	0.821966	0.00575734	0.692742	0.0204605	Modellparzelle
5	A			11.5952	50.6285	0.726724	0.0248193	0.819471	0.00689018	0.669611	0.0327947	Modellparzelle
5	A			11.5953	50.6285	0.730257	0.0127713	0.819839	0.00763045	0.689809	0.022447	Modellparzelle
5	A			11.5951	50.6285	0.724837	0.0180696	0.818415	0.00790239	0.688397	0.0215314	Modellparzelle
5	A			11.5952	50.6285	0.729274	0.0155076	0.821444	0.00558846	0.678787	0.0365846	Modellparzelle
5	A			11.5953	50.6285	0.729867	0.0144387	0.821255	0.00472531	0.680228	0.035031	Modellparzelle
5	A			11.5951	50.6285	0.71956	0.0209038	0.819505	0.00734123	0.69862	0.0291381	Modellparzelle
5	A			11.5952	50.6285	0.727612	0.0183445	0.81819	0.00648863	0.667706	0.0363371	Modellparzelle
5	A			11.5953	50.6285	0.727145	0.0178144	0.819432	0.00758406	0.681867	0.0334434	Modellparzelle
5	A			11.5951	50.6285	0.718243	0.0329439	0.819572	0.00612751	0.697685	0.0298774	Modellparzelle
5	A			11.5952	50.6285	0.722773	0.0225614	0.818457	0.00635199	0.671524	0.0332367	Modellparzelle
5	A			11.5953	50.6285	0.728512	0.0141736	0.822356	0.00616868	0.685287	0.0424232	Modellparzelle
5	A			11.5951	50.6285	0.721215	0.0258561	0.819718	0.00587498	0.7029	0.0273725	Modellparzelle
5	A			11.5952	50.6285	0.727393	0.0184198	0.820941	0.00581597	0.67644	0.0394056	Modellparzelle
5	A			11.5953	50.6285	0.727493	0.0216103	0.821718	0.00833944	0.676442	0.0420447	Modellparzelle
5	A			11.5951	50.6286	0.727155	0.0165571	0.816415	0.00650686	0.693897	0.0246801	Modellparzelle
5	A			11.5952	50.6285	0.726539	0.031214	0.822345	0.00567002	0.681379	0.0321573	Modellparzelle
5	A			11.5953	50.6285	0.72771	0.0226391	0.823626	0.00548774	0.687427	0.0371309	Modellparzelle
5	A			11.5951	50.6286	0.725016	0.017011	0.818192	0.0066732	0.696792	0.0199879	Modellparzelle
5	A			11.5952	50.6286	0.731131	0.0151777	0.82083	0.00539475	0.697371	0.0280795	Modellparzelle
5	A			11.5953	50.6286	0.723859	0.0316654	0.824776	0.00521271	0.687011	0.0350473	Modellparzelle
5	A			11.5951	50.6286	0.725502	0.0178754	0.816262	0.00732806	0.688152	0.0293141	Modellparzelle
5	A			11.5952	50.6286	0.734833	0.0160895	0.818645	0.00595753	0.678785	0.0322245	Modellparzelle
5	A			11.5953	50.6286	0.713007	0.0476857	0.822637	0.00483737	0.670751	0.0261288	Modellparzelle
5	A			11.5951	50.6286	0.725387	0.0209459	0.815987	0.00735872	0.675384	0.0278472	Modellparzelle
5	A			11.5952	50.6286	0.730569	0.029326	0.81838	0.00630327	0.687314	0.0404604	Modellparzelle
5	A			11.5953	50.6286	0.729795	0.021531	0.822897	0.00573656	0.671517	0.0395116	Modellparzelle
5	A			11.5951	50.6286	0.728763	0.0156752	0.819616	0.0059049	0.679924	0.0270297	Modellparzelle
[truncated: 6,101 more rows]
